# Supplementary material
Source: publisher figshare collection journal article supplement (https://gsajournals.figshare.com/ndownloader/files/33924839)
Supplement: Supplementary file 1 [file 33924839]

## Sheet: Cover
An interolog-based barley interactome as an integration framework for NLR immune signaling.
Valeria Velásquez-Zapata, J. Mitch Elmore, Greg Fuerst, Roger P. Wise
S1 Data. Predicted barley interactome (HvInt) and experimentally validated Arabidopsis interactome (AtInt).
Column	Details
Source	source node
Target	target node
Weight	weight given by expression distance correlation
Source description	source description
Target description	target description

## Sheet: HvInt
Source	Target	Weight	Source description	Target description
HORVU.MOREX.r2.3HG0232100	HORVU.MOREX.r2.UnG0630320	0.412672	50S ribosomal protein L15, putative, expressed	50S ribosomal protein L16
HORVU.MOREX.r2.6HG0491650	HORVU.MOREX.r2.UnG0630320	0.185358	LETM1 and EF-hand domain-containing protein 1, mitochondrial	50S ribosomal protein L16
HORVU.MOREX.r2.5HG0436100	HORVU.MOREX.r2.UnG0630320	0.317056	50S ribosomal protein L17	50S ribosomal protein L16
HORVU.MOREX.r2.6HG0497950	HORVU.MOREX.r2.1HG0000740	0.259404	Receptor-like kinase	Charged multivesicular body protein 5
HORVU.MOREX.r2.4HG0323930	HORVU.MOREX.r2.1HG0000740	0.828996	Receptor-like protein kinase	Charged multivesicular body protein 5
HORVU.MOREX.r2.3HG0264810	HORVU.MOREX.r2.1HG0000740	NA	Sugar transporter, putative	Charged multivesicular body protein 5
HORVU.MOREX.r2.2HG0150720	HORVU.MOREX.r2.1HG0000740	0.506401	Transporter-related family protein	Charged multivesicular body protein 5
HORVU.MOREX.r2.5HG0385110	HORVU.MOREX.r2.1HG0000740	0.864983	PRA1 family protein	Charged multivesicular body protein 5
HORVU.MOREX.r2.4HG0279340	HORVU.MOREX.r2.1HG0000740	0.307518	Plasma membrane ATPase	Charged multivesicular body protein 5
HORVU.MOREX.r2.2HG0079060	HORVU.MOREX.r2.1HG0000740	0.569072	Ethylene receptor	Charged multivesicular body protein 5
HORVU.MOREX.r2.4HG0333940	HORVU.MOREX.r2.1HG0000740	0.2705	ABC transporter G family member	Charged multivesicular body protein 5
HORVU.MOREX.r2.4HG0327430	HORVU.MOREX.r2.1HG0000740	0.714073	Transmembrane 9 superfamily member	Charged multivesicular body protein 5
HORVU.MOREX.r2.1HG0070350	HORVU.MOREX.r2.1HG0000740	0.289966	O-acyltransferase WSD1	Charged multivesicular body protein 5
HORVU.MOREX.r2.6HG0478620	HORVU.MOREX.r2.1HG0000740	0.773438	ADP,ATP carrier protein	Charged multivesicular body protein 5
HORVU.MOREX.r2.6HG0458700	HORVU.MOREX.r2.1HG0000740	0.42929	Phosphatidate cytidylyltransferase	Charged multivesicular body protein 5
HORVU.MOREX.r2.4HG0277550	HORVU.MOREX.r2.1HG0000740	0.178243	Potassium channel	Charged multivesicular body protein 5
HORVU.MOREX.r2.5HG0389750	HORVU.MOREX.r2.1HG0000740	0.476907	Vacuolar sorting-associated protein 32-like protein	Charged multivesicular body protein 5
HORVU.MOREX.r2.3HG0189240	HORVU.MOREX.r2.1HG0000740	0.298845	Peptide transporter	Charged multivesicular body protein 5
HORVU.MOREX.r2.2HG0088830	HORVU.MOREX.r2.1HG0000740	0.497644	Protein phosphatase 2C-like protein	Charged multivesicular body protein 5
HORVU.MOREX.r2.5HG0414270	HORVU.MOREX.r2.1HG0000740	0.260606	O-acyltransferase WSD1	Charged multivesicular body protein 5
HORVU.MOREX.r2.5HG0401680	HORVU.MOREX.r2.1HG0000740	0.112319	Transmembrane protein 45B	Charged multivesicular body protein 5
HORVU.MOREX.r2.5HG0384950	HORVU.MOREX.r2.1HG0000740	0.158027	Cation/H(+) antiporter	Charged multivesicular body protein 5
HORVU.MOREX.r2.4HG0329100	HORVU.MOREX.r2.1HG0000740	0.443858	Receptor-like kinase	Charged multivesicular body protein 5
HORVU.MOREX.r2.1HG0033010	HORVU.MOREX.r2.1HG0000740	0.14941	Long-chain-alcohol oxidase	Charged multivesicular body protein 5
HORVU.MOREX.r2.5HG0404510	HORVU.MOREX.r2.1HG0000740	0.469208	Protein kinase family protein	Charged multivesicular body protein 5
HORVU.MOREX.r2.7HG0542470	HORVU.MOREX.r2.1HG0000740	NA	O-acyltransferase WSD1	Charged multivesicular body protein 5
HORVU.MOREX.r2.3HG0232400	HORVU.MOREX.r2.1HG0000740	0.745922	O-acyltransferase WSD1	Charged multivesicular body protein 5
HORVU.MOREX.r2.7HG0530810	HORVU.MOREX.r2.1HG0000740	0.753074	Cellulose synthase-like protein	Charged multivesicular body protein 5
HORVU.MOREX.r2.1HG0060800	HORVU.MOREX.r2.1HG0000740	0.218076	Ring finger protein, putative	Charged multivesicular body protein 5
HORVU.MOREX.r2.7HG0555440	HORVU.MOREX.r2.1HG0000740	0.132804	Cytochrome P450	Charged multivesicular body protein 5
HORVU.MOREX.r2.6HG0484350	HORVU.MOREX.r2.1HG0000740	0.468448	Transcription factor GTE4	Charged multivesicular body protein 5
HORVU.MOREX.r2.7HG0537760	HORVU.MOREX.r2.1HG0000740	0.231723	NRT1/PTR family protein 2.2	Charged multivesicular body protein 5
HORVU.MOREX.r2.7HG0599010	HORVU.MOREX.r2.1HG0000740	0.597037	extracellular ligand-gated ion channel protein (DUF3537)	Charged multivesicular body protein 5
HORVU.MOREX.r2.3HG0273830	HORVU.MOREX.r2.1HG0000740	0.474972	Cytochrome P450	Charged multivesicular body protein 5
HORVU.MOREX.r2.7HG0599040	HORVU.MOREX.r2.1HG0000740	0.246797	Receptor-like protein kinase	Charged multivesicular body protein 5
HORVU.MOREX.r2.7HG0529500	HORVU.MOREX.r2.1HG0000740	0.229941	WAT1-related protein	Charged multivesicular body protein 5
HORVU.MOREX.r2.3HG0205390	HORVU.MOREX.r2.1HG0000740	0.344618	Gdt1-like protein chloroplastic-like	Charged multivesicular body protein 5
HORVU.MOREX.r2.7HG0599600	HORVU.MOREX.r2.1HG0000740	0.541124	Potassium transporter	Charged multivesicular body protein 5
HORVU.MOREX.r2.5HG0401690	HORVU.MOREX.r2.1HG0000740	0.67649	Transmembrane protein 45B	Charged multivesicular body protein 5
HORVU.MOREX.r2.6HG0476190	HORVU.MOREX.r2.1HG0000740	0.620969	Receptor-like protein kinase	Charged multivesicular body protein 5
HORVU.MOREX.r2.5HG0424850	HORVU.MOREX.r2.1HG0000740	0.335922	ABC transporter B family protein	Charged multivesicular body protein 5
HORVU.MOREX.r2.5HG0392570	HORVU.MOREX.r2.1HG0000740	0.292108	Receptor kinase, putative	Charged multivesicular body protein 5
HORVU.MOREX.r2.7HG0557110	HORVU.MOREX.r2.1HG0000740	0.657382	Potassium transporter	Charged multivesicular body protein 5
HORVU.MOREX.r2.6HG0479930	HORVU.MOREX.r2.1HG0000740	0.53287	ATP-binding cassette transporter subfamily A member	Charged multivesicular body protein 5
HORVU.MOREX.r2.6HG0450880	HORVU.MOREX.r2.1HG0000740	0.261857	RING finger protein	Charged multivesicular body protein 5
HORVU.MOREX.r2.5HG0418360	HORVU.MOREX.r2.1HG0000740	0.153488	O-acyltransferase WSD1	Charged multivesicular body protein 5
HORVU.MOREX.r2.7HG0557080	HORVU.MOREX.r2.1HG0000740	0.411009	NHL repeat-containing protein-like	Charged multivesicular body protein 5
HORVU.MOREX.r2.6HG0506560	HORVU.MOREX.r2.1HG0000740	NA	Ethylene receptor	Charged multivesicular body protein 5
HORVU.MOREX.r2.3HG0233190	HORVU.MOREX.r2.1HG0000740	0.755731	Protein kinase family protein	Charged multivesicular body protein 5
HORVU.MOREX.r2.2HG0080140	HORVU.MOREX.r2.1HG0000740	0.271336	Cytochrome P450 family protein	Charged multivesicular body protein 5
HORVU.MOREX.r2.7HG0612440	HORVU.MOREX.r2.1HG0000740	0.751169	LEM3 (Ligand-effect modulator 3)-like	Charged multivesicular body protein 5
HORVU.MOREX.r2.2HG0083720	HORVU.MOREX.r2.1HG0000740	0.830245	Sugar transporter, putative	Charged multivesicular body protein 5
HORVU.MOREX.r2.7HG0569910	HORVU.MOREX.r2.1HG0000740	0.227614	Ankyrin repeat-containing protein	Charged multivesicular body protein 5
HORVU.MOREX.r2.6HG0473200	HORVU.MOREX.r2.1HG0000740	0.128603	Receptor protein kinase, putative	Charged multivesicular body protein 5
HORVU.MOREX.r2.2HG0155090	HORVU.MOREX.r2.1HG0000740	0.244831	Cytochrome P450	Charged multivesicular body protein 5
HORVU.MOREX.r2.6HG0490460	HORVU.MOREX.r2.1HG0000740	NA	Cyclin family protein	Charged multivesicular body protein 5
HORVU.MOREX.r2.3HG0192310	HORVU.MOREX.r2.1HG0000740	0.137016	Major facilitator superfamily protein	Charged multivesicular body protein 5
HORVU.MOREX.r2.1HG0047070	HORVU.MOREX.r2.1HG0000740	0.427512	Signal peptidase I	Charged multivesicular body protein 5
HORVU.MOREX.r2.2HG0111520	HORVU.MOREX.r2.1HG0000740	0.735894	Sugar transporter, putative	Charged multivesicular body protein 5
HORVU.MOREX.r2.2HG0157420	HORVU.MOREX.r2.1HG0000740	NA	Peptide transporter	Charged multivesicular body protein 5
HORVU.MOREX.r2.1HG0070460	HORVU.MOREX.r2.1HG0000740	NA	Purine permease	Charged multivesicular body protein 5
HORVU.MOREX.r2.5HG0349640	HORVU.MOREX.r2.1HG0000740	NA	Cation/H(+) antiporter	Charged multivesicular body protein 5
HORVU.MOREX.r2.7HG0545260	HORVU.MOREX.r2.1HG0000740	0.120988	Cytochrome P450	Charged multivesicular body protein 5
HORVU.MOREX.r2.3HG0240030	HORVU.MOREX.r2.1HG0000740	0.552909	tobamovirus multiplication protein	Charged multivesicular body protein 5
HORVU.MOREX.r2.2HG0158800	HORVU.MOREX.r2.1HG0000740	0.334741	Potassium transporter	Charged multivesicular body protein 5
HORVU.MOREX.r2.1HG0020140	HORVU.MOREX.r2.1HG0000740	0.381647	Receptor-like kinase, putative	Charged multivesicular body protein 5
HORVU.MOREX.r2.2HG0148310	HORVU.MOREX.r2.1HG0000740	0.458869	Organic solute transporter-like	Charged multivesicular body protein 5
HORVU.MOREX.r2.6HG0449580	HORVU.MOREX.r2.1HG0000740	0.714045	WAT1-related protein	Charged multivesicular body protein 5
HORVU.MOREX.r2.2HG0171110	HORVU.MOREX.r2.1HG0000740	0.886995	Cyclic nucleotide-gated channel	Charged multivesicular body protein 5
HORVU.MOREX.r2.5HG0411330	HORVU.MOREX.r2.1HG0000740	0.36295	Flotillin-1	Charged multivesicular body protein 5
HORVU.MOREX.r2.1HG0051870	HORVU.MOREX.r2.1HG0000740	0.17275	Plasma membrane ATPase	Charged multivesicular body protein 5
HORVU.MOREX.r2.4HG0326810	HORVU.MOREX.r2.1HG0000740	0.292764	Ras-like protein	Charged multivesicular body protein 5
HORVU.MOREX.r2.4HG0339130	HORVU.MOREX.r2.1HG0000740	NA	Receptor-like protein kinase	Charged multivesicular body protein 5
HORVU.MOREX.r2.7HG0578670	HORVU.MOREX.r2.1HG0000740	0.132787	Sugar transporter, putative	Charged multivesicular body protein 5
HORVU.MOREX.r2.5HG0349820	HORVU.MOREX.r2.1HG0000740	0.460853	NRT1/PTR family protein 2.2	Charged multivesicular body protein 5
HORVU.MOREX.r2.3HG0195880	HORVU.MOREX.r2.1HG0000740	0.493928	PRA1 family protein	Charged multivesicular body protein 5
HORVU.MOREX.r2.7HG0583590	HORVU.MOREX.r2.1HG0000740	0.727037	Amino acid transporter, putative	Charged multivesicular body protein 5
HORVU.MOREX.r2.7HG0538280	HORVU.MOREX.r2.1HG0000740	0.472606	Cytochrome P450	Charged multivesicular body protein 5
HORVU.MOREX.r2.5HG0401210	HORVU.MOREX.r2.1HG0000740	0.863213	RING/FYVE/PHD zinc finger superfamily protein	Charged multivesicular body protein 5
HORVU.MOREX.r2.6HG0490260	HORVU.MOREX.r2.1HG0000740	NA	Cyclin family protein	Charged multivesicular body protein 5
HORVU.MOREX.r2.1HG0043560	HORVU.MOREX.r2.1HG0000740	0.427243	Magnesium transporter MRS2-like protein	Charged multivesicular body protein 5
HORVU.MOREX.r2.5HG0439340	HORVU.MOREX.r2.1HG0000740	0.145619	Cation/H(+) antiporter	Charged multivesicular body protein 5
HORVU.MOREX.r2.3HG0182640	HORVU.MOREX.r2.1HG0000740	NA	O-acyltransferase WSD1	Charged multivesicular body protein 5
HORVU.MOREX.r2.6HG0513560	HORVU.MOREX.r2.1HG0000740	NA	WAT1-related protein	Charged multivesicular body protein 5
HORVU.MOREX.r2.5HG0411430	HORVU.MOREX.r2.1HG0000740	0.36295	Flotillin-1	Charged multivesicular body protein 5
HORVU.MOREX.r2.7HG0606680	HORVU.MOREX.r2.1HG0000740	0.165592	glucuronoxylan 4-O-methyltransferase-like protein (DUF579)	Charged multivesicular body protein 5
HORVU.MOREX.r2.5HG0412170	HORVU.MOREX.r2.1HG0000740	0.454908	Ankyrin repeat-containing protein	Charged multivesicular body protein 5
HORVU.MOREX.r2.6HG0456210	HORVU.MOREX.r2.1HG0000740	0.215056	Protein DETOXIFICATION	Charged multivesicular body protein 5
HORVU.MOREX.r2.2HG0129100	HORVU.MOREX.r2.1HG0000740	0.10993	Dihydroflavonol 4-reductase/flavanone protein	Charged multivesicular body protein 5
HORVU.MOREX.r2.4HG0281500	HORVU.MOREX.r2.1HG0000740	NA	Protein kinase	Charged multivesicular body protein 5
HORVU.MOREX.r2.3HG0201110	HORVU.MOREX.r2.1HG0000740	0.26173	Receptor-like kinase, putative	Charged multivesicular body protein 5
HORVU.MOREX.r2.2HG0170120	HORVU.MOREX.r2.1HG0000740	0.29722	glucuronoxylan 4-O-methyltransferase-like protein (DUF579)	Charged multivesicular body protein 5
HORVU.MOREX.r2.3HG0206370	HORVU.MOREX.r2.1HG0000740	0.8503	Peroxisomal membrane 22 kDa (Mpv17/PMP22) family protein	Charged multivesicular body protein 5
HORVU.MOREX.r2.1HG0021280	HORVU.MOREX.r2.1HG0000740	0.426678	Phosphate translocator	Charged multivesicular body protein 5
HORVU.MOREX.r2.3HG0264820	HORVU.MOREX.r2.1HG0000740	0.400958	Sugar transporter, putative	Charged multivesicular body protein 5
HORVU.MOREX.r2.1HG0033820	HORVU.MOREX.r2.1HG0000740	0.379156	Transporter-related family protein	Charged multivesicular body protein 5
HORVU.MOREX.r2.2HG0138120	HORVU.MOREX.r2.1HG0000740	0.323141	Ring finger protein, putative	Charged multivesicular body protein 5
HORVU.MOREX.r2.2HG0149890	HORVU.MOREX.r2.1HG0000740	NA	Cytochrome P450 family protein, expressed	Charged multivesicular body protein 5
HORVU.MOREX.r2.3HG0244720	HORVU.MOREX.r2.1HG0000740	0.195062	Dihydroflavonol 4-reductase/flavanone protein	Charged multivesicular body protein 5
HORVU.MOREX.r2.4HG0281220	HORVU.MOREX.r2.1HG0000740	0.469381	Receptor-like kinase	Charged multivesicular body protein 5
HORVU.MOREX.r2.1HG0032950	HORVU.MOREX.r2.1HG0000740	0.38168	Long-chain-alcohol oxidase	Charged multivesicular body protein 5
HORVU.MOREX.r2.4HG0278220	HORVU.MOREX.r2.1HG0000740	0.426207	Guanine nucleotide-binding protein subunit beta	Charged multivesicular body protein 5
HORVU.MOREX.r2.6HG0459740	HORVU.MOREX.r2.1HG0000740	0.201063	Transmembrane protein, putative	Charged multivesicular body protein 5
HORVU.MOREX.r2.2HG0156810	HORVU.MOREX.r2.1HG0000740	0.554631	WD40 repeat-containing protein	Charged multivesicular body protein 5
HORVU.MOREX.r2.1HG0066220	HORVU.MOREX.r2.1HG0000740	0.29385	Myosin	Charged multivesicular body protein 5
HORVU.MOREX.r2.4HG0279230	HORVU.MOREX.r2.1HG0000740	0.521182	NRT1/PTR family protein 2.2	Charged multivesicular body protein 5
HORVU.MOREX.r2.6HG0508670	HORVU.MOREX.r2.1HG0000740	0.195385	Nicastrin	Charged multivesicular body protein 5
HORVU.MOREX.r2.2HG0151890	HORVU.MOREX.r2.1HG0000740	0.283599	ABC transporter G family member	Charged multivesicular body protein 5
HORVU.MOREX.r2.1HG0069800	HORVU.MOREX.r2.1HG0000740	0.182906	Protein DETOXIFICATION	Charged multivesicular body protein 5
HORVU.MOREX.r2.2HG0168500	HORVU.MOREX.r2.1HG0000740	0.289429	Plasma membrane ATPase	Charged multivesicular body protein 5
HORVU.MOREX.r2.6HG0502880	HORVU.MOREX.r2.1HG0000740	0.234115	Ubiquinol oxidase	Charged multivesicular body protein 5
HORVU.MOREX.r2.UnG0631660	HORVU.MOREX.r2.1HG0000740	0.36295	Flotillin-1	Charged multivesicular body protein 5
HORVU.MOREX.r2.5HG0424840	HORVU.MOREX.r2.1HG0000740	0.183846	ABC transporter B family protein	Charged multivesicular body protein 5
HORVU.MOREX.r2.3HG0266020	HORVU.MOREX.r2.1HG0000740	0.238089	Bax inhibitor-1 family protein	Charged multivesicular body protein 5
HORVU.MOREX.r2.3HG0257810	HORVU.MOREX.r2.1HG0000740	0.195755	ATP-binding ABC transporter	Charged multivesicular body protein 5
HORVU.MOREX.r2.4HG0347430	HORVU.MOREX.r2.1HG0000740	NA	Peptide transporter, putative	Charged multivesicular body protein 5
HORVU.MOREX.r2.1HG0034280	HORVU.MOREX.r2.1HG0000740	NA	Flotillin-1	Charged multivesicular body protein 5
HORVU.MOREX.r2.1HG0042180	HORVU.MOREX.r2.1HG0000740	0.327769	Sugar transporter, putative	Charged multivesicular body protein 5
HORVU.MOREX.r2.7HG0588100	HORVU.MOREX.r2.1HG0000740	0.655187	Glucan endo-1,3-beta-glucosidase, putative	Charged multivesicular body protein 5
HORVU.MOREX.r2.4HG0279410	HORVU.MOREX.r2.1HG0000740	NA	Serine/threonine-protein kinase	Charged multivesicular body protein 5
HORVU.MOREX.r2.7HG0558270	HORVU.MOREX.r2.1HG0000740	0.299769	Receptor-like protein kinase	Charged multivesicular body protein 5
HORVU.MOREX.r2.6HG0467940	HORVU.MOREX.r2.1HG0000740	0.268765	glucuronoxylan 4-O-methyltransferase-like protein (DUF579)	Charged multivesicular body protein 5
HORVU.MOREX.r2.7HG0529000	HORVU.MOREX.r2.1HG0000740	0.288351	WAT1-related protein	Charged multivesicular body protein 5
HORVU.MOREX.r2.4HG0281540	HORVU.MOREX.r2.1HG0000740	NA	Protein kinase	Charged multivesicular body protein 5
HORVU.MOREX.r2.5HG0429700	HORVU.MOREX.r2.1HG0000740	0.192562	Ring finger protein, putative	Charged multivesicular body protein 5
HORVU.MOREX.r2.5HG0390690	HORVU.MOREX.r2.1HG0000740	0.182101	Sugar transporter, putative	Charged multivesicular body protein 5
HORVU.MOREX.r2.5HG0419010	HORVU.MOREX.r2.1HG0000740	NA	Receptor kinase-like protein	Charged multivesicular body protein 5
HORVU.MOREX.r2.3HG0258980	HORVU.MOREX.r2.1HG0000740	0.277741	Auxin efflux carrier component	Charged multivesicular body protein 5
HORVU.MOREX.r2.3HG0202960	HORVU.MOREX.r2.1HG0000740	0.362354	Alkaline phytoceramidase (APHC)	Charged multivesicular body protein 5
HORVU.MOREX.r2.3HG0223950	HORVU.MOREX.r2.1HG0000740	0.24724	dihydroflavonol 4-reductase/flavanone protein	Charged multivesicular body protein 5
HORVU.MOREX.r2.6HG0512750	HORVU.MOREX.r2.1HG0000740	0.182791	Cyclic nucleotide gated channel	Charged multivesicular body protein 5
HORVU.MOREX.r2.6HG0507580	HORVU.MOREX.r2.1HG0000740	0.602887	NHL repeat-containing protein-like	Charged multivesicular body protein 5
HORVU.MOREX.r2.1HG0073410	HORVU.MOREX.r2.1HG0000740	0.306075	Cold acclimation protein	Charged multivesicular body protein 5
HORVU.MOREX.r2.1HG0070430	HORVU.MOREX.r2.1HG0000740	0.125607	Purine permease	Charged multivesicular body protein 5
HORVU.MOREX.r2.1HG0006050	HORVU.MOREX.r2.1HG0000740	0.170707	Cytochrome P450	Charged multivesicular body protein 5
HORVU.MOREX.r2.3HG0265990	HORVU.MOREX.r2.1HG0000740	0.100825	Bax inhibitor-1 family protein	Charged multivesicular body protein 5
HORVU.MOREX.r2.7HG0589750	HORVU.MOREX.r2.1HG0000740	0.269745	Receptor-like kinase, putative	Charged multivesicular body protein 5
HORVU.MOREX.r2.2HG0137930	HORVU.MOREX.r2.1HG0000740	NA	Aluminum-activated malate transporter	Charged multivesicular body protein 5
HORVU.MOREX.r2.7HG0584830	HORVU.MOREX.r2.1HG0000740	0.204563	Major facilitator superfamily domain-containing protein	Charged multivesicular body protein 5
HORVU.MOREX.r2.1HG0037240	HORVU.MOREX.r2.1HG0000740	0.548127	Ras family protein	Charged multivesicular body protein 5
HORVU.MOREX.r2.1HG0070410	HORVU.MOREX.r2.1HG0000740	NA	Purine permease	Charged multivesicular body protein 5
HORVU.MOREX.r2.6HG0500250	HORVU.MOREX.r2.1HG0000740	NA	Cytochrome P450 family protein	Charged multivesicular body protein 5
HORVU.MOREX.r2.3HG0234870	HORVU.MOREX.r2.1HG0000740	0.267047	RING/U-box superfamily protein	Charged multivesicular body protein 5
HORVU.MOREX.r2.2HG0155060	HORVU.MOREX.r2.1HG0000740	0.131635	Cytochrome P450 family protein	Charged multivesicular body protein 5
HORVU.MOREX.r2.3HG0254010	HORVU.MOREX.r2.1HG0000740	0.266133	PRA1 family protein	Charged multivesicular body protein 5
HORVU.MOREX.r2.5HG0401430	HORVU.MOREX.r2.1HG0000740	0.464485	Sulfate transporter 1	Charged multivesicular body protein 5
HORVU.MOREX.r2.2HG0160580	HORVU.MOREX.r2.1HG0000740	0.921965	Ubiquinol oxidase	Charged multivesicular body protein 5
HORVU.MOREX.r2.4HG0280520	HORVU.MOREX.r2.1HG0000740	0.567512	SNARE associated Golgi protein family	Charged multivesicular body protein 5
HORVU.MOREX.r2.3HG0183480	HORVU.MOREX.r2.1HG0000740	0.171941	O-acyltransferase WSD1	Charged multivesicular body protein 5
HORVU.MOREX.r2.3HG0188960	HORVU.MOREX.r2.1HG0000740	0.856952	Katanin p60 ATPase-containing subunit, putative	Charged multivesicular body protein 5
HORVU.MOREX.r2.4HG0328220	HORVU.MOREX.r2.1HG0000740	0.49407	Protein DETOXIFICATION	Charged multivesicular body protein 5
HORVU.MOREX.r2.7HG0602950	HORVU.MOREX.r2.1HG0000740	0.173431	Cytochrome P450	Charged multivesicular body protein 5
HORVU.MOREX.r2.1HG0021470	HORVU.MOREX.r2.1HG0000740	0.581364	RING/U-box superfamily protein	Charged multivesicular body protein 5
HORVU.MOREX.r2.4HG0344040	HORVU.MOREX.r2.1HG0000740	0.523499	Aquaporin-like protein	Charged multivesicular body protein 5
HORVU.MOREX.r2.3HG0187370	HORVU.MOREX.r2.1HG0000740	0.71583	Hexose transporter	Charged multivesicular body protein 5
HORVU.MOREX.r2.3HG0275770	HORVU.MOREX.r2.1HG0000740	0.734013	Plant cadmium resistance protein	Charged multivesicular body protein 5
HORVU.MOREX.r2.6HG0523500	HORVU.MOREX.r2.1HG0000740	0.162758	Ethylene receptor	Charged multivesicular body protein 5
HORVU.MOREX.r2.5HG0349490	HORVU.MOREX.r2.1HG0000740	NA	Sugar transporter, putative	Charged multivesicular body protein 5
HORVU.MOREX.r2.5HG0420070	HORVU.MOREX.r2.1HG0000740	0.181695	transmembrane protein	Charged multivesicular body protein 5
HORVU.MOREX.r2.3HG0247680	HORVU.MOREX.r2.1HG0000740	0.638055	Receptor-like kinase	Charged multivesicular body protein 5
HORVU.MOREX.r2.2HG0086230	HORVU.MOREX.r2.1HG0000740	0.255147	Aquaporin	Charged multivesicular body protein 5
HORVU.MOREX.r2.1HG0057670	HORVU.MOREX.r2.1HG0000740	0.911207	Plant cadmium resistance protein	Charged multivesicular body protein 5
HORVU.MOREX.r2.1HG0046920	HORVU.MOREX.r2.1HG0000740	0.37315	Cation/H(+) antiporter	Charged multivesicular body protein 5
HORVU.MOREX.r2.5HG0392210	HORVU.MOREX.r2.1HG0000740	0.230738	RING/U-box superfamily protein	Charged multivesicular body protein 5
HORVU.MOREX.r2.2HG0117130	HORVU.MOREX.r2.1HG0000740	0.679754	Potassium transporter	Charged multivesicular body protein 5
HORVU.MOREX.r2.6HG0476720	HORVU.MOREX.r2.1HG0000740	0.511529	Receptor-like protein kinase	Charged multivesicular body protein 5
HORVU.MOREX.r2.7HG0534930	HORVU.MOREX.r2.1HG0000740	NA	Sulfite exporter TauE/SafE family protein, putative	Charged multivesicular body protein 5
HORVU.MOREX.r2.5HG0423060	HORVU.MOREX.r2.1HG0000740	0.28297	LEM3 (Ligand-effect modulator 3)-like	Charged multivesicular body protein 5
HORVU.MOREX.r2.4HG0321710	HORVU.MOREX.r2.1HG0000740	0.632915	Ankyrin repeat-containing protein	Charged multivesicular body protein 5
HORVU.MOREX.r2.6HG0451800	HORVU.MOREX.r2.1HG0000740	0.245378	Receptor-like protein kinase	Charged multivesicular body protein 5
HORVU.MOREX.r2.4HG0339440	HORVU.MOREX.r2.1HG0000740	NA	Receptor kinase-like protein	Charged multivesicular body protein 5
HORVU.MOREX.r2.4HG0281530	HORVU.MOREX.r2.1HG0000740	0.325725	Protein kinase	Charged multivesicular body protein 5
HORVU.MOREX.r2.6HG0457460	HORVU.MOREX.r2.1HG0000740	NA	O-acyltransferase WSD1	Charged multivesicular body protein 5
HORVU.MOREX.r2.6HG0449480	HORVU.MOREX.r2.1HG0000740	0.217384	WAT1-related protein	Charged multivesicular body protein 5
HORVU.MOREX.r2.5HG0431340	HORVU.MOREX.r2.1HG0000740	0.636286	Bax inhibitor-1 family protein	Charged multivesicular body protein 5
HORVU.MOREX.r2.7HG0610610	HORVU.MOREX.r2.1HG0000740	0.173739	Dolichyl-diphosphooligosaccharide--protein glycosyltransferase subunit DAD1	Charged multivesicular body protein 5
HORVU.MOREX.r2.6HG0513500	HORVU.MOREX.r2.1HG0000740	NA	WAT1-related protein	Charged multivesicular body protein 5
HORVU.MOREX.r2.2HG0160590	HORVU.MOREX.r2.1HG0000740	0.9037	Ubiquinol oxidase	Charged multivesicular body protein 5
HORVU.MOREX.r2.3HG0206910	HORVU.MOREX.r2.1HG0000740	NA	Aquaporin-like protein	Charged multivesicular body protein 5
HORVU.MOREX.r2.4HG0281100	HORVU.MOREX.r2.1HG0000740	0.542361	Protein CASP	Charged multivesicular body protein 5
HORVU.MOREX.r2.5HG0445510	HORVU.MOREX.r2.1HG0000740	0.674693	Derlin	Charged multivesicular body protein 5
HORVU.MOREX.r2.3HG0266010	HORVU.MOREX.r2.1HG0000740	0.405018	Bax inhibitor-1 family protein	Charged multivesicular body protein 5
HORVU.MOREX.r2.1HG0023790	HORVU.MOREX.r2.1HG0000740	0.289546	PRA1 family protein	Charged multivesicular body protein 5
HORVU.MOREX.r2.6HG0506710	HORVU.MOREX.r2.1HG0000740	0.711975	Altered inheritance of mitochondria protein 32	Charged multivesicular body protein 5
HORVU.MOREX.r2.5HG0349810	HORVU.MOREX.r2.1HG0000740	0.250046	Plasma membrane ATPase	Charged multivesicular body protein 5
HORVU.MOREX.r2.7HG0548300	HORVU.MOREX.r2.1HG0000740	NA	Amino acid transporter, putative	Charged multivesicular body protein 5
HORVU.MOREX.r2.4HG0321420	HORVU.MOREX.r2.1HG0000740	0.175626	ABC transporter G family member	Charged multivesicular body protein 5
HORVU.MOREX.r2.3HG0232250	HORVU.MOREX.r2.1HG0000740	0.222779	Purine permease	Charged multivesicular body protein 5
HORVU.MOREX.r2.7HG0532120	HORVU.MOREX.r2.1HG0000740	0.298009	Cytochrome P450	Charged multivesicular body protein 5
HORVU.MOREX.r2.6HG0476220	HORVU.MOREX.r2.1HG0000740	0.890317	Receptor-like protein kinase	Charged multivesicular body protein 5
HORVU.MOREX.r2.1HG0046710	HORVU.MOREX.r2.1HG0000740	0.227459	ABC transporter G family member	Charged multivesicular body protein 5
HORVU.MOREX.r2.6HG0470280	HORVU.MOREX.r2.1HG0000740	0.195584	Flotillin-like protein 1	Charged multivesicular body protein 5
HORVU.MOREX.r2.7HG0613170	HORVU.MOREX.r2.1HG0000740	NA	WAT1-related protein	Charged multivesicular body protein 5
HORVU.MOREX.r2.2HG0157340	HORVU.MOREX.r2.1HG0000740	0.339107	Receptor-like kinase	Charged multivesicular body protein 5
HORVU.MOREX.r2.3HG0202690	HORVU.MOREX.r2.1HG0000740	0.625965	Alpha/beta-Hydrolases superfamily protein	Charged multivesicular body protein 5
HORVU.MOREX.r2.5HG0372200	HORVU.MOREX.r2.1HG0000740	0.210952	Transmembrane 19	Charged multivesicular body protein 5
HORVU.MOREX.r2.3HG0228420	HORVU.MOREX.r2.1HG0000740	0.836605	ADP,ATP carrier protein	Charged multivesicular body protein 5
HORVU.MOREX.r2.3HG0199080	HORVU.MOREX.r2.1HG0000740	0.289574	Transmembrane protein 19	Charged multivesicular body protein 5
HORVU.MOREX.r2.6HG0473310	HORVU.MOREX.r2.1HG0000740	0.945316	LEM3 (Ligand-effect modulator 3)-like	Charged multivesicular body protein 5
HORVU.MOREX.r2.7HG0550340	HORVU.MOREX.r2.1HG0000740	0.160361	WAT1-related protein	Charged multivesicular body protein 5
HORVU.MOREX.r2.2HG0147120	HORVU.MOREX.r2.1HG0000740	0.185948	Transporter	Charged multivesicular body protein 5
HORVU.MOREX.r2.1HG0039190	HORVU.MOREX.r2.1HG0000740	NA	Cyclin family protein	Charged multivesicular body protein 5
HORVU.MOREX.r2.5HG0424570	HORVU.MOREX.r2.1HG0000740	0.278241	Potassium channel	Charged multivesicular body protein 5
HORVU.MOREX.r2.4HG0343360	HORVU.MOREX.r2.1HG0000740	0.724362	Multidrug resistance protein ABC transporter family protein	Charged multivesicular body protein 5
HORVU.MOREX.r2.7HG0617870	HORVU.MOREX.r2.1HG0000740	0.13335	Er membrane protein complex subunit 7-like protein	Charged multivesicular body protein 5
HORVU.MOREX.r2.1HG0057800	HORVU.MOREX.r2.1HG0000740	0.824166	PRA1 family protein	Charged multivesicular body protein 5
HORVU.MOREX.r2.2HG0141910	HORVU.MOREX.r2.1HG0000740	0.35134	extracellular ligand-gated ion channel protein (DUF3537)	Charged multivesicular body protein 5
HORVU.MOREX.r2.6HG0491140	HORVU.MOREX.r2.1HG0000740	0.180952	Ergosterol biosynthetic protein 28	Charged multivesicular body protein 5
HORVU.MOREX.r2.1HG0077180	HORVU.MOREX.r2.1HG0000740	0.272408	dihydroflavonol 4-reductase/flavanone protein	Charged multivesicular body protein 5
HORVU.MOREX.r2.7HG0597660	HORVU.MOREX.r2.1HG0000740	0.667618	Charged multivesicular body protein	Charged multivesicular body protein 5
HORVU.MOREX.r2.7HG0562040	HORVU.MOREX.r2.1HG0000740	0.120273	Receptor protein kinase, putative	Charged multivesicular body protein 5
HORVU.MOREX.r2.6HG0490990	HORVU.MOREX.r2.1HG0000740	NA	Dihydroflavonol 4-reductase/flavanone protein	Charged multivesicular body protein 5
HORVU.MOREX.r2.6HG0518380	HORVU.MOREX.r2.1HG0000740	0.106848	Plasma membrane ATPase	Charged multivesicular body protein 5
HORVU.MOREX.r2.1HG0044330	HORVU.MOREX.r2.1HG0000740	0.554077	Altered inheritance of mitochondria protein 32	Charged multivesicular body protein 5
HORVU.MOREX.r2.7HG0538510	HORVU.MOREX.r2.1HG0000740	NA	WAT1-related protein	Charged multivesicular body protein 5
HORVU.MOREX.r2.4HG0285910	HORVU.MOREX.r2.1HG0000740	NA	Cyclin	Charged multivesicular body protein 5
HORVU.MOREX.r2.1HG0063620	HORVU.MOREX.r2.1HG0000740	0.828993	Phosphate transporter	Charged multivesicular body protein 5
HORVU.MOREX.r2.4HG0298100	HORVU.MOREX.r2.1HG0000740	0.348114	Proline transporter	Charged multivesicular body protein 5
HORVU.MOREX.r2.7HG0592090	HORVU.MOREX.r2.1HG0000740	0.191795	Cytochrome P450	Charged multivesicular body protein 5
HORVU.MOREX.r2.7HG0593780	HORVU.MOREX.r2.1HG0000740	0.817961	Transmembrane protein, putative	Charged multivesicular body protein 5
HORVU.MOREX.r2.4HG0348680	HORVU.MOREX.r2.1HG0000740	0.572473	Charged multivesicular body protein 3	Charged multivesicular body protein 5
HORVU.MOREX.r2.2HG0155110	HORVU.MOREX.r2.1HG0000740	0.395499	Cytochrome P450 family protein	Charged multivesicular body protein 5
HORVU.MOREX.r2.1HG0068840	HORVU.MOREX.r2.1HG0000740	0.717971	Protein kinase family protein	Charged multivesicular body protein 5
HORVU.MOREX.r2.5HG0422400	HORVU.MOREX.r2.1HG0000740	0.257948	Vacuolar protein sorting-associated 2-2-like protein	Charged multivesicular body protein 5
HORVU.MOREX.r2.6HG0516170	HORVU.MOREX.r2.1HG0000740	0.523291	RING/U-box superfamily protein	Charged multivesicular body protein 5
HORVU.MOREX.r2.5HG0405240	HORVU.MOREX.r2.1HG0000740	0.339745	Receptor protein kinase, putative	Charged multivesicular body protein 5
HORVU.MOREX.r2.6HG0513520	HORVU.MOREX.r2.1HG0000740	0.154685	WAT1-related protein	Charged multivesicular body protein 5
HORVU.MOREX.r2.3HG0264880	HORVU.MOREX.r2.1HG0000740	0.665349	Phosphate transporter	Charged multivesicular body protein 5
HORVU.MOREX.r2.5HG0414340	HORVU.MOREX.r2.1HG0000740	0.134205	O-acyltransferase WSD1	Charged multivesicular body protein 5
HORVU.MOREX.r2.2HG0148270	HORVU.MOREX.r2.1HG0000740	0.546231	Ergosterol biosynthetic protein 28	Charged multivesicular body protein 5
HORVU.MOREX.r2.4HG0332690	HORVU.MOREX.r2.1HG0000740	0.227805	Sulfate transporter	Charged multivesicular body protein 5
HORVU.MOREX.r2.5HG0423660	HORVU.MOREX.r2.1HG0000740	0.4381	Bax inhibitor-1 family protein	Charged multivesicular body protein 5
HORVU.MOREX.r2.6HG0513540	HORVU.MOREX.r2.1HG0000740	NA	WAT1-related protein	Charged multivesicular body protein 5
HORVU.MOREX.r2.5HG0354550	HORVU.MOREX.r2.1HG0000740	0.481532	Cation/H(+) antiporter	Charged multivesicular body protein 5
HORVU.MOREX.r2.7HG0531890	HORVU.MOREX.r2.1HG0000740	0.289575	Flavonoid 3'-hydroxylase	Charged multivesicular body protein 5
HORVU.MOREX.r2.5HG0434210	HORVU.MOREX.r2.1HG0000740	0.300072	Signal peptidase I	Charged multivesicular body protein 5
HORVU.MOREX.r2.5HG0409460	HORVU.MOREX.r2.1HG0000740	NA	Auxin efflux carrier component	Charged multivesicular body protein 5
HORVU.MOREX.r2.6HG0507640	HORVU.MOREX.r2.1HG0000740	0.569653	Potassium transporter	Charged multivesicular body protein 5
HORVU.MOREX.r2.2HG0148770	HORVU.MOREX.r2.1HG0000740	0.273251	transmembrane protein, putative (DUF247)	Charged multivesicular body protein 5
HORVU.MOREX.r2.3HG0187720	HORVU.MOREX.r2.1HG0000740	0.876401	Protein kinase family protein	Charged multivesicular body protein 5
HORVU.MOREX.r2.7HG0530900	HORVU.MOREX.r2.1HG0000740	0.303965	Dolichyl-diphosphooligosaccharide--protein glycosyltransferase subunit DAD1	Charged multivesicular body protein 5
HORVU.MOREX.r2.6HG0468110	HORVU.MOREX.r2.1HG0000740	NA	Sugar transporter, putative	Charged multivesicular body protein 5
HORVU.MOREX.r2.5HG0363660	HORVU.MOREX.r2.1HG0000740	0.395434	Cyclin	Charged multivesicular body protein 5
HORVU.MOREX.r2.2HG0117650	HORVU.MOREX.r2.1HG0000740	0.269288	Organic solute transporter-like	Charged multivesicular body protein 5
HORVU.MOREX.r2.5HG0435600	HORVU.MOREX.r2.1HG0000740	0.181286	Mitochondrial Rho GTPase	Charged multivesicular body protein 5
HORVU.MOREX.r2.3HG0192580	HORVU.MOREX.r2.1HG0000740	0.202485	O-acyltransferase WSD1	Charged multivesicular body protein 5
HORVU.MOREX.r2.2HG0110730	HORVU.MOREX.r2.1HG0000740	0.671218	Protein DETOXIFICATION	Charged multivesicular body protein 5
HORVU.MOREX.r2.4HG0295780	HORVU.MOREX.r2.1HG0000740	0.826338	PRA1 family protein	Charged multivesicular body protein 5
HORVU.MOREX.r2.6HG0486440	HORVU.MOREX.r2.1HG0000740	0.411163	Vesicle transport protein	Charged multivesicular body protein 5
HORVU.MOREX.r2.3HG0200760	HORVU.MOREX.r2.1HG0000740	0.716677	Triose phosphate/phosphate translocator, chloroplastic	Charged multivesicular body protein 5
HORVU.MOREX.r2.1HG0025520	HORVU.MOREX.r2.1HG0000740	0.295527	ABC transporter G family member	Charged multivesicular body protein 5
HORVU.MOREX.r2.3HG0198850	HORVU.MOREX.r2.1HG0000740	0.627339	RING/U-box superfamily protein	Charged multivesicular body protein 5
HORVU.MOREX.r2.5HG0419410	HORVU.MOREX.r2.1HG0000740	0.458832	Purine permease-related family protein	Charged multivesicular body protein 5
HORVU.MOREX.r2.4HG0319980	HORVU.MOREX.r2.1HG0000740	0.288783	Protein phosphatase 2C family protein	Charged multivesicular body protein 5
HORVU.MOREX.r2.2HG0146410	HORVU.MOREX.r2.1HG0000740	0.822463	Receptor-like kinase	Charged multivesicular body protein 5
HORVU.MOREX.r2.4HG0331120	HORVU.MOREX.r2.1HG0000740	NA	Cyclin	Charged multivesicular body protein 5
HORVU.MOREX.r2.1HG0000740	HORVU.MOREX.r2.1HG0000740	1	Charged multivesicular body protein 5	Charged multivesicular body protein 5
HORVU.MOREX.r2.3HG0183470	HORVU.MOREX.r2.1HG0000740	NA	O-acyltransferase WSD1	Charged multivesicular body protein 5
HORVU.MOREX.r2.5HG0424900	HORVU.MOREX.r2.1HG0000740	0.185184	Transmembrane protein adipocyte-associated 1	Charged multivesicular body protein 5
HORVU.MOREX.r2.7HG0534430	HORVU.MOREX.r2.1HG0000740	0.504018	LMBR1-like membrane protein	Charged multivesicular body protein 5
HORVU.MOREX.r2.2HG0143470	HORVU.MOREX.r2.1HG0000740	0.17351	Receptor-like kinase	Charged multivesicular body protein 5
HORVU.MOREX.r2.6HG0493980	HORVU.MOREX.r2.1HG0000740	0.463239	Long-chain-alcohol oxidase	Charged multivesicular body protein 5
HORVU.MOREX.r2.4HG0291500	HORVU.MOREX.r2.1HG0000740	0.412113	Receptor-like kinase	Charged multivesicular body protein 5
HORVU.MOREX.r2.2HG0083570	HORVU.MOREX.r2.1HG0000740	NA	NRT1/PTR family protein 2.2	Charged multivesicular body protein 5
HORVU.MOREX.r2.4HG0321550	HORVU.MOREX.r2.1HG0000740	0.244809	Receptor-like kinase, putative	Charged multivesicular body protein 5
HORVU.MOREX.r2.1HG0076500	HORVU.MOREX.r2.1HG0004810	0.673237	Calcium-dependent protein kinase	Actin depolymerizing factor
HORVU.MOREX.r2.6HG0469000	HORVU.MOREX.r2.1HG0004810	0.23387	Polyubiquitin	Actin depolymerizing factor
HORVU.MOREX.r2.2HG0172010	HORVU.MOREX.r2.1HG0004810	0.537231	transcription factor-like protein	Actin depolymerizing factor
HORVU.MOREX.r2.7HG0608370	HORVU.MOREX.r2.1HG0004810	0.492126	Polyubiquitin	Actin depolymerizing factor
HORVU.MOREX.r2.6HG0523500	HORVU.MOREX.r2.1HG0004810	0.246052	Ethylene receptor	Actin depolymerizing factor
HORVU.MOREX.r2.6HG0469030	HORVU.MOREX.r2.1HG0004810	0.176987	Polyubiquitin protein	Actin depolymerizing factor
HORVU.MOREX.r2.6HG0506560	HORVU.MOREX.r2.1HG0004810	NA	Ethylene receptor	Actin depolymerizing factor
HORVU.MOREX.r2.2HG0079060	HORVU.MOREX.r2.1HG0004810	0.728823	Ethylene receptor	Actin depolymerizing factor
HORVU.MOREX.r2.3HG0226490	HORVU.MOREX.r2.1HG0004810	0.710951	Calcium-dependent protein kinase	Actin depolymerizing factor
HORVU.MOREX.r2.5HG0373900	HORVU.MOREX.r2.1HG0004810	0.17631	Calcium-dependent protein kinase	Actin depolymerizing factor
HORVU.MOREX.r2.7HG0551570	HORVU.MOREX.r2.1HG0041270	NA	Heat-shock protein, putative	Carbohydrate kinase, putative, expressed
HORVU.MOREX.r2.1HG0017530	HORVU.MOREX.r2.1HG0041270	0.810155	Anaphase-promoting complex subunit 7	Carbohydrate kinase, putative, expressed
HORVU.MOREX.r2.7HG0551550	HORVU.MOREX.r2.1HG0041270	0.155572	Heat-shock protein, putative	Carbohydrate kinase, putative, expressed
HORVU.MOREX.r2.7HG0551540	HORVU.MOREX.r2.1HG0041270	0.215382	Heat-shock protein, putative	Carbohydrate kinase, putative, expressed
HORVU.MOREX.r2.3HG0256310	HORVU.MOREX.r2.1HG0056950	0.268748	KH domain-containing protein	KH domain-containing protein
HORVU.MOREX.r2.1HG0052310	HORVU.MOREX.r2.1HG0056950	0.246873	KH domain-containing protein	KH domain-containing protein
HORVU.MOREX.r2.7HG0549490	HORVU.MOREX.r2.1HG0056110	0.615387	T-complex protein 1 subunit delta	Proteasome subunit alpha type
HORVU.MOREX.r2.1HG0056110	HORVU.MOREX.r2.1HG0056110	1	Proteasome subunit alpha type	Proteasome subunit alpha type
HORVU.MOREX.r2.7HG0538650	HORVU.MOREX.r2.1HG0056110	0.570208	Coatomer beta subunit, putative	Proteasome subunit alpha type
HORVU.MOREX.r2.2HG0161350	HORVU.MOREX.r2.1HG0056110	0.859697	26S proteasome regulatory subunit family protein	Proteasome subunit alpha type
HORVU.MOREX.r2.1HG0042030	HORVU.MOREX.r2.1HG0056110	0.606033	26S proteasome regulatory subunit family protein	Proteasome subunit alpha type
HORVU.MOREX.r2.2HG0084300	HORVU.MOREX.r2.1HG0056110	0.696279	60 kDa chaperonin	Proteasome subunit alpha type
HORVU.MOREX.r2.4HG0337290	HORVU.MOREX.r2.1HG0056110	0.903785	Proteasome subunit alpha type	Proteasome subunit alpha type
HORVU.MOREX.r2.6HG0520000	HORVU.MOREX.r2.1HG0056110	0.782287	26S protease regulatory subunit-like protein	Proteasome subunit alpha type
HORVU.MOREX.r2.1HG0074920	HORVU.MOREX.r2.1HG0056110	0.732291	Proteasome subunit beta type	Proteasome subunit alpha type
HORVU.MOREX.r2.4HG0332970	HORVU.MOREX.r2.1HG0056110	NA	60 kDa chaperonin	Proteasome subunit alpha type
HORVU.MOREX.r2.5HG0374940	HORVU.MOREX.r2.1HG0056110	0.265588	E3 ubiquitin-protein ligase	Proteasome subunit alpha type
HORVU.MOREX.r2.6HG0469030	HORVU.MOREX.r2.1HG0056110	0.255356	Polyubiquitin protein	Proteasome subunit alpha type
HORVU.MOREX.r2.4HG0279770	HORVU.MOREX.r2.1HG0056110	0.897543	Proteasome subunit beta type	Proteasome subunit alpha type
HORVU.MOREX.r2.5HG0415180	HORVU.MOREX.r2.1HG0056110	0.832751	Proteasome subunit alpha type	Proteasome subunit alpha type
HORVU.MOREX.r2.4HG0338920	HORVU.MOREX.r2.1HG0056110	0.746812	60 kDa chaperonin	Proteasome subunit alpha type
HORVU.MOREX.r2.4HG0280050	HORVU.MOREX.r2.1HG0056110	0.638253	Importin-5	Proteasome subunit alpha type
HORVU.MOREX.r2.7HG0570790	HORVU.MOREX.r2.1HG0056110	0.702567	Proteasome subunit alpha type	Proteasome subunit alpha type
HORVU.MOREX.r2.7HG0588640	HORVU.MOREX.r2.1HG0056110	0.459015	T-complex protein 1 subunit gamma	Proteasome subunit alpha type
HORVU.MOREX.r2.6HG0474390	HORVU.MOREX.r2.1HG0056110	0.57465	26S protease regulatory subunit	Proteasome subunit alpha type
HORVU.MOREX.r2.4HG0319150	HORVU.MOREX.r2.1HG0056110	0.427952	26S protease regulatory subunit	Proteasome subunit alpha type
HORVU.MOREX.r2.6HG0467890	HORVU.MOREX.r2.1HG0056110	0.576065	T-complex protein 1 subunit eta	Proteasome subunit alpha type
HORVU.MOREX.r2.2HG0156810	HORVU.MOREX.r2.1HG0056110	0.199896	WD40 repeat-containing protein	Proteasome subunit alpha type
HORVU.MOREX.r2.7HG0544550	HORVU.MOREX.r2.1HG0056110	0.797949	Proteasome subunit alpha type	Proteasome subunit alpha type
HORVU.MOREX.r2.7HG0562070	HORVU.MOREX.r2.1HG0056110	0.562181	Ubiquinone biosynthesis protein COQ9, mitochondrial	Proteasome subunit alpha type
HORVU.MOREX.r2.4HG0344760	HORVU.MOREX.r2.1HG0056110	0.715841	26S proteasome non-ATPase regulatory subunit-like protein	Proteasome subunit alpha type
HORVU.MOREX.r2.5HG0444970	HORVU.MOREX.r2.1HG0056110	0.722987	26S proteasome non-ATPase regulatory subunit	Proteasome subunit alpha type
HORVU.MOREX.r2.6HG0478760	HORVU.MOREX.r2.1HG0056110	0.673686	26S protease regulatory subunit, putative	Proteasome subunit alpha type
HORVU.MOREX.r2.6HG0464080	HORVU.MOREX.r2.1HG0056110	0.702838	26S proteasome non-ATPase regulatory subunit-like protein	Proteasome subunit alpha type
HORVU.MOREX.r2.6HG0490320	HORVU.MOREX.r2.1HG0056110	0.681084	26S proteasome non-atpase regulatory subunit, putative	Proteasome subunit alpha type
HORVU.MOREX.r2.7HG0608370	HORVU.MOREX.r2.1HG0056110	0.471071	Polyubiquitin	Proteasome subunit alpha type
HORVU.MOREX.r2.4HG0308660	HORVU.MOREX.r2.1HG0056110	0.774967	Proteasome subunit alpha type	Proteasome subunit alpha type
HORVU.MOREX.r2.6HG0523490	HORVU.MOREX.r2.1HG0056110	0.593721	T-complex protein 1 subunit zeta	Proteasome subunit alpha type
HORVU.MOREX.r2.2HG0101410	HORVU.MOREX.r2.1HG0056110	0.218753	Histone acetyltransferase	Proteasome subunit alpha type
HORVU.MOREX.r2.2HG0167640	HORVU.MOREX.r2.1HG0056110	0.781978	Eukaryotic translation initiation factor 3 subunit F	Proteasome subunit alpha type
HORVU.MOREX.r2.5HG0409440	HORVU.MOREX.r2.1HG0056110	0.8568	Proteasome subunit beta type	Proteasome subunit alpha type
HORVU.MOREX.r2.6HG0515910	HORVU.MOREX.r2.1HG0056110	0.774198	26S protease regulatory subunit	Proteasome subunit alpha type
HORVU.MOREX.r2.2HG0146120	HORVU.MOREX.r2.1HG0056110	0.781332	26S proteasome non-atpase regulatory subunit, putative	Proteasome subunit alpha type
HORVU.MOREX.r2.1HG0044870	HORVU.MOREX.r2.1HG0056110	0.223563	T-complex protein 1	Proteasome subunit alpha type
HORVU.MOREX.r2.1HG0031510	HORVU.MOREX.r2.1HG0056110	0.595928	60 kDa chaperonin	Proteasome subunit alpha type
HORVU.MOREX.r2.6HG0469000	HORVU.MOREX.r2.1HG0056110	0.246377	Polyubiquitin	Proteasome subunit alpha type
HORVU.MOREX.r2.1HG0023540	HORVU.MOREX.r2.1HG0056110	0.83705	Proteasome subunit beta type	Proteasome subunit alpha type
HORVU.MOREX.r2.7HG0537870	HORVU.MOREX.r2.1HG0056110	0.797665	Proteasome subunit beta type	Proteasome subunit alpha type
HORVU.MOREX.r2.4HG0308580	HORVU.MOREX.r2.1HG0056110	0.514235	T-complex protein 1 subunit theta	Proteasome subunit alpha type
HORVU.MOREX.r2.7HG0595300	HORVU.MOREX.r2.1HG0056110	0.557739	T-complex protein 1 subunit epsilon	Proteasome subunit alpha type
HORVU.MOREX.r2.7HG0541070	HORVU.MOREX.r2.1HG0056110	0.811145	Proteasome subunit beta type	Proteasome subunit alpha type
HORVU.MOREX.r2.7HG0558720	HORVU.MOREX.r2.1HG0056110	0.624395	T-complex protein 1 subunit alpha	Proteasome subunit alpha type
HORVU.MOREX.r2.2HG0141080	HORVU.MOREX.r2.1HG0056110	0.610779	26S proteasome non-ATPase regulatory subunit-like protein	Proteasome subunit alpha type
HORVU.MOREX.r2.7HG0602880	HORVU.MOREX.r2.1HG0056110	0.269484	26S proteasome regulatory subunit	Proteasome subunit alpha type
HORVU.MOREX.r2.2HG0158670	HORVU.MOREX.r2.1HG0056110	0.481278	26S proteasome non-atpase regulatory subunit, putative	Proteasome subunit alpha type
HORVU.MOREX.r2.5HG0411360	HORVU.MOREX.r2.1HG0056110	0.845901	Proteasome subunit beta type	Proteasome subunit alpha type
HORVU.MOREX.r2.7HG0597220	HORVU.MOREX.r2.1HG0056110	0.82112	26S protease regulatory subunit	Proteasome subunit alpha type
HORVU.MOREX.r2.4HG0332910	HORVU.MOREX.r2.1HG0056110	0.651386	26S proteasome regulatory subunit	Proteasome subunit alpha type
HORVU.MOREX.r2.2HG0088730	HORVU.MOREX.r2.1HG0056110	0.755692	26S protease regulatory subunit	Proteasome subunit alpha type
HORVU.MOREX.r2.7HG0592250	HORVU.MOREX.r2.1HG0056110	0.593374	26S protease regulatory subunit, putative	Proteasome subunit alpha type
HORVU.MOREX.r2.5HG0382390	HORVU.MOREX.r2.1HG0056110	0.749198	Proteasome-associated protein ECM29-like protein	Proteasome subunit alpha type
HORVU.MOREX.r2.2HG0079710	HORVU.MOREX.r2.1HG0056110	0.346196	Peptidyl-prolyl cis-trans isomerase	Proteasome subunit alpha type
HORVU.MOREX.r2.5HG0415950	HORVU.MOREX.r2.1HG0056110	0.570216	26S proteasome regulatory subunit	Proteasome subunit alpha type
HORVU.MOREX.r2.2HG0129920	HORVU.MOREX.r2.1HG0056110	0.786317	26S proteasome non-ATPase regulatory subunit-like protein	Proteasome subunit alpha type
HORVU.MOREX.r2.5HG0434930	HORVU.MOREX.r2.1HG0056110	0.751627	Proteasome subunit beta type	Proteasome subunit alpha type
HORVU.MOREX.r2.5HG0447070	HORVU.MOREX.r2.1HG0056110	0.669465	60 kDa chaperonin	Proteasome subunit alpha type
HORVU.MOREX.r2.2HG0143360	HORVU.MOREX.r2.1HG0056090	0.162241	AGAMOUS-like MADS-box transcription factor	Calmodulin
HORVU.MOREX.r2.5HG0398520	HORVU.MOREX.r2.1HG0056090	0.217887	SAUR-like auxin-responsive protein family	Calmodulin
HORVU.MOREX.r2.4HG0291070	HORVU.MOREX.r2.1HG0056090	0.19225	Receptor-like kinase	Calmodulin
HORVU.MOREX.r2.4HG0340100	HORVU.MOREX.r2.1HG0056090	NA	Transport inhibitor response 1-like protein	Calmodulin
HORVU.MOREX.r2.4HG0314920	HORVU.MOREX.r2.1HG0056090	0.289528	Receptor-like protein kinase	Calmodulin
HORVU.MOREX.r2.2HG0128840	HORVU.MOREX.r2.1HG0056090	0.331942	Protein kinase	Calmodulin
HORVU.MOREX.r2.2HG0129220	HORVU.MOREX.r2.1HG0056090	NA	MADS-box transcription factor	Calmodulin
HORVU.MOREX.r2.2HG0155620	HORVU.MOREX.r2.1HG0056090	0.229826	Kinase family protein	Calmodulin
HORVU.MOREX.r2.3HG0237390	HORVU.MOREX.r2.1HG0056090	0.309578	Pleiotropic drug resistance ABC transporter	Calmodulin
HORVU.MOREX.r2.4HG0313800	HORVU.MOREX.r2.1HG0056090	0.47463	Kinase family protein	Calmodulin
HORVU.MOREX.r2.6HG0454780	HORVU.MOREX.r2.1HG0056090	0.249372	Kinase family protein	Calmodulin
HORVU.MOREX.r2.3HG0240630	HORVU.MOREX.r2.1HG0056090	0.451949	BZIP transcription factor	Calmodulin
HORVU.MOREX.r2.7HG0561100	HORVU.MOREX.r2.1HG0056090	0.317995	Pyrophosphate--fructose 6-phosphate 1-phosphotransferase subunit alpha	Calmodulin
HORVU.MOREX.r2.2HG0144240	HORVU.MOREX.r2.1HG0056090	0.19108	ATP-dependent 6-phosphofructokinase	Calmodulin
HORVU.MOREX.r2.6HG0509780	HORVU.MOREX.r2.1HG0056090	0.38647	Shikimate kinase	Calmodulin
HORVU.MOREX.r2.5HG0400680	HORVU.MOREX.r2.1HG0056090	0.465441	Non-specific serine/threonine protein kinase	Calmodulin
HORVU.MOREX.r2.5HG0417590	HORVU.MOREX.r2.1HG0056090	0.226188	O-fucosyltransferase-like protein	Calmodulin
HORVU.MOREX.r2.5HG0404030	HORVU.MOREX.r2.1HG0056090	0.280064	Kinase family protein	Calmodulin
HORVU.MOREX.r2.3HG0275020	HORVU.MOREX.r2.1HG0056090	NA	MADS-box transcription factor	Calmodulin
HORVU.MOREX.r2.4HG0338270	HORVU.MOREX.r2.1HG0056090	0.397415	Transport inhibitor response 1-like protein	Calmodulin
HORVU.MOREX.r2.1HG0024570	HORVU.MOREX.r2.1HG0056090	0.135953	Agamous MADS-box transcription factor	Calmodulin
HORVU.MOREX.r2.1HG0063950	HORVU.MOREX.r2.1HG0056090	0.274923	LURP-one-like protein	Calmodulin
HORVU.MOREX.r2.6HG0453310	HORVU.MOREX.r2.1HG0056090	NA	Kinase family protein	Calmodulin
HORVU.MOREX.r2.1HG0033160	HORVU.MOREX.r2.1HG0056090	0.335456	Kinase family protein	Calmodulin
HORVU.MOREX.r2.2HG0155670	HORVU.MOREX.r2.1HG0056090	0.35679	O-fucosyltransferase family protein	Calmodulin
HORVU.MOREX.r2.6HG0511490	HORVU.MOREX.r2.1HG0056090	0.237611	Transport inhibitor response 1-like protein	Calmodulin
HORVU.MOREX.r2.7HG0595640	HORVU.MOREX.r2.1HG0056090	0.579418	Pleiotropic drug resistance ABC transporter	Calmodulin
HORVU.MOREX.r2.3HG0247880	HORVU.MOREX.r2.1HG0056090	0.202636	Receptor-like protein kinase	Calmodulin
HORVU.MOREX.r2.5HG0349390	HORVU.MOREX.r2.1HG0056090	NA	AGAMOUS MADS box factor transcription factor	Calmodulin
HORVU.MOREX.r2.4HG0279270	HORVU.MOREX.r2.1HG0056090	0.282892	Calcium-dependent protein kinase	Calmodulin
HORVU.MOREX.r2.7HG0562040	HORVU.MOREX.r2.1HG0056090	0.166047	Receptor protein kinase, putative	Calmodulin
HORVU.MOREX.r2.6HG0505220	HORVU.MOREX.r2.1HG0056090	0.684319	Pyrophosphate--fructose 6-phosphate 1-phosphotransferase subunit alpha	Calmodulin
HORVU.MOREX.r2.7HG0612760	HORVU.MOREX.r2.1HG0056090	0.625502	Receptor-like kinase	Calmodulin
HORVU.MOREX.r2.4HG0282240	HORVU.MOREX.r2.1HG0056090	0.423725	GRAS transcription factor	Calmodulin
HORVU.MOREX.r2.3HG0257020	HORVU.MOREX.r2.1HG0056090	0.461658	DUF506 family protein	Calmodulin
HORVU.MOREX.r2.4HG0284880	HORVU.MOREX.r2.1HG0056090	NA	WD40-repeat protein	Calmodulin
HORVU.MOREX.r2.4HG0311100	HORVU.MOREX.r2.1HG0056090	0.393362	14-3-3 protein	Calmodulin
HORVU.MOREX.r2.7HG0552530	HORVU.MOREX.r2.1HG0056090	0.56279	Shikimate kinase	Calmodulin
HORVU.MOREX.r2.7HG0623430	HORVU.MOREX.r2.1HG0056090	0.391758	Kinase family protein	Calmodulin
HORVU.MOREX.r2.7HG0550580	HORVU.MOREX.r2.1HG0056090	0.206285	BZIP transcription factor family protein	Calmodulin
HORVU.MOREX.r2.1HG0006350	HORVU.MOREX.r2.1HG0056090	0.222801	Agamous MADS-box transcription factor	Calmodulin
HORVU.MOREX.r2.4HG0328620	HORVU.MOREX.r2.1HG0056090	0.282747	Kinase, putative	Calmodulin
HORVU.MOREX.r2.4HG0296360	HORVU.MOREX.r2.1HG0056090	0.470221	transcription factor-like protein	Calmodulin
HORVU.MOREX.r2.5HG0383680	HORVU.MOREX.r2.1HG0056090	0.316677	BZIP transcription factor	Calmodulin
HORVU.MOREX.r2.3HG0238260	HORVU.MOREX.r2.1HG0056090	NA	WRKY family transcription factor	Calmodulin
HORVU.MOREX.r2.2HG0079820	HORVU.MOREX.r2.1HG0056090	0.493735	WRKY transcription factor	Calmodulin
HORVU.MOREX.r2.3HG0187470	HORVU.MOREX.r2.1HG0056090	0.386933	Receptor-like kinase	Calmodulin
HORVU.MOREX.r2.3HG0195950	HORVU.MOREX.r2.1HG0056090	0.22271	Receptor-like kinase	Calmodulin
HORVU.MOREX.r2.3HG0250850	HORVU.MOREX.r2.1HG0056090	0.140499	transcription factor-like protein	Calmodulin
HORVU.MOREX.r2.3HG0230390	HORVU.MOREX.r2.1HG0056090	0.534268	Mitogen-activated protein kinase	Calmodulin
HORVU.MOREX.r2.6HG0491680	HORVU.MOREX.r2.1HG0056090	0.508624	Protein kinase, putative	Calmodulin
HORVU.MOREX.r2.3HG0194360	HORVU.MOREX.r2.1HG0056090	0.376559	Receptor protein kinase, putative	Calmodulin
HORVU.MOREX.r2.4HG0325280	HORVU.MOREX.r2.1HG0056090	0.240591	Phosphoenolpyruvate carboxykinase (ATP)-like protein	Calmodulin
HORVU.MOREX.r2.6HG0496750	HORVU.MOREX.r2.1HG0056090	0.267658	Aldehyde dehydrogenase	Calmodulin
HORVU.MOREX.r2.3HG0235640	HORVU.MOREX.r2.1HG0056090	0.428393	Receptor-like kinase	Calmodulin
HORVU.MOREX.r2.5HG0406220	HORVU.MOREX.r2.1HG0056090	0.755987	Heat shock protein 90	Calmodulin
HORVU.MOREX.r2.5HG0362130	HORVU.MOREX.r2.1HG0056090	0.152755	WD40-repeat protein	Calmodulin
HORVU.MOREX.r2.1HG0071870	HORVU.MOREX.r2.1HG0056090	0.604817	Calcium binding	Calmodulin
HORVU.MOREX.r2.5HG0424650	HORVU.MOREX.r2.1HG0056090	0.404822	MADS box transcription factor	Calmodulin
HORVU.MOREX.r2.4HG0288270	HORVU.MOREX.r2.1HG0056090	0.203728	Basic-leucine zipper (bZIP) transcription factor family protein	Calmodulin
HORVU.MOREX.r2.2HG0143420	HORVU.MOREX.r2.1HG0056090	0.493528	14-3-3 protein	Calmodulin
HORVU.MOREX.r2.4HG0335890	HORVU.MOREX.r2.1HG0056090	0.547452	Protein kinase	Calmodulin
HORVU.MOREX.r2.7HG0565000	HORVU.MOREX.r2.1HG0056090	0.148624	Protein kinase	Calmodulin
HORVU.MOREX.r2.7HG0597090	HORVU.MOREX.r2.1HG0056090	0.264437	Non-specific serine/threonine protein kinase	Calmodulin
HORVU.MOREX.r2.6HG0513990	HORVU.MOREX.r2.1HG0056090	0.34132	BZIP transcription factor	Calmodulin
HORVU.MOREX.r2.4HG0292580	HORVU.MOREX.r2.1HG0056090	NA	Non-specific serine/threonine protein kinase	Calmodulin
HORVU.MOREX.r2.2HG0146410	HORVU.MOREX.r2.1HG0056090	0.683383	Receptor-like kinase	Calmodulin
HORVU.MOREX.r2.3HG0255840	HORVU.MOREX.r2.1HG0056090	0.566533	Protein kinase, putative	Calmodulin
HORVU.MOREX.r2.5HG0373090	HORVU.MOREX.r2.1HG0056090	0.319061	Basic-leucine zipper (bZIP) transcription factor family protein	Calmodulin
HORVU.MOREX.r2.1HG0033960	HORVU.MOREX.r2.1HG0056090	0.473828	Double stranded RNA binding protein 3	Calmodulin
HORVU.MOREX.r2.1HG0060430	HORVU.MOREX.r2.1HG0056090	0.296735	transcription factor-like protein	Calmodulin
HORVU.MOREX.r2.3HG0229280	HORVU.MOREX.r2.1HG0056090	0.332198	Kinase family protein	Calmodulin
HORVU.MOREX.r2.2HG0113820	HORVU.MOREX.r2.1HG0056090	0.354737	GRAS transcription factor	Calmodulin
HORVU.MOREX.r2.5HG0413450	HORVU.MOREX.r2.1HG0056090	0.559255	Cytochrome P450, putative	Calmodulin
HORVU.MOREX.r2.4HG0341550	HORVU.MOREX.r2.1HG0056090	0.338417	Protein kinase	Calmodulin
HORVU.MOREX.r2.3HG0241350	HORVU.MOREX.r2.1HG0056090	0.205847	Tesmin/TSO1-like CXC domain-containing protein	Calmodulin
HORVU.MOREX.r2.7HG0571570	HORVU.MOREX.r2.1HG0056090	0.210728	O-fucosyltransferase-like protein	Calmodulin
HORVU.MOREX.r2.7HG0595850	HORVU.MOREX.r2.1HG0056090	0.13561	SWIM zinc finger family protein / mitogen-activated protein kinase kinase kinase-related, putative	Calmodulin
HORVU.MOREX.r2.2HG0153170	HORVU.MOREX.r2.1HG0056090	0.469539	Aldehyde dehydrogenase	Calmodulin
HORVU.MOREX.r2.4HG0340850	HORVU.MOREX.r2.1HG0056090	0.35863	Cytochrome P450, putative	Calmodulin
HORVU.MOREX.r2.1HG0076500	HORVU.MOREX.r2.1HG0056090	0.399097	Calcium-dependent protein kinase	Calmodulin
HORVU.MOREX.r2.7HG0570570	HORVU.MOREX.r2.1HG0056090	0.440518	Cytochrome P450	Calmodulin
HORVU.MOREX.r2.2HG0110340	HORVU.MOREX.r2.1HG0056090	0.47067	Scarecrow transcription factor family protein	Calmodulin
HORVU.MOREX.r2.6HG0496790	HORVU.MOREX.r2.1HG0056090	0.248788	Aldehyde dehydrogenase	Calmodulin
HORVU.MOREX.r2.7HG0541840	HORVU.MOREX.r2.1HG0056090	NA	Agamous MADS-box transcription factor	Calmodulin
HORVU.MOREX.r2.2HG0094420	HORVU.MOREX.r2.1HG0056090	0.426398	Kinase family protein	Calmodulin
HORVU.MOREX.r2.3HG0239700	HORVU.MOREX.r2.1HG0056090	0.273492	Protein kinase, putative	Calmodulin
HORVU.MOREX.r2.3HG0204170	HORVU.MOREX.r2.1HG0056090	0.182582	Basic-leucine zipper (bZIP) transcription factor family protein	Calmodulin
HORVU.MOREX.r2.1HG0012580	HORVU.MOREX.r2.1HG0056090	0.574906	BZIP transcription factor	Calmodulin
HORVU.MOREX.r2.6HG0499880	HORVU.MOREX.r2.1HG0056090	0.181088	Kinase family protein	Calmodulin
HORVU.MOREX.r2.1HG0073230	HORVU.MOREX.r2.1HG0056090	0.585151	Kinase family protein	Calmodulin
HORVU.MOREX.r2.2HG0172010	HORVU.MOREX.r2.1HG0056090	0.405125	transcription factor-like protein	Calmodulin
HORVU.MOREX.r2.5HG0443670	HORVU.MOREX.r2.1HG0056090	0.207335	Kinase-like protein	Calmodulin
HORVU.MOREX.r2.4HG0287800	HORVU.MOREX.r2.1HG0056090	NA	Auxin F-box protein 1	Calmodulin
HORVU.MOREX.r2.5HG0349480	HORVU.MOREX.r2.1HG0056090	NA	Agamous MADS-box transcription factor	Calmodulin
HORVU.MOREX.r2.1HG0075930	HORVU.MOREX.r2.1HG0056090	0.249395	Mitogen-activated protein kinase	Calmodulin
HORVU.MOREX.r2.4HG0281090	HORVU.MOREX.r2.1HG0056090	0.700566	14-3-3 protein	Calmodulin
HORVU.MOREX.r2.1HG0006360	HORVU.MOREX.r2.1HG0056090	NA	Agamous MADS-box transcription factor	Calmodulin
HORVU.MOREX.r2.4HG0331210	HORVU.MOREX.r2.1HG0056090	0.479308	Protein kinase	Calmodulin
HORVU.MOREX.r2.2HG0171610	HORVU.MOREX.r2.1HG0056090	0.300227	Shikimate kinase	Calmodulin
HORVU.MOREX.r2.1HG0039950	HORVU.MOREX.r2.1HG0056090	0.335796	Kinase family protein	Calmodulin
HORVU.MOREX.r2.3HG0201840	HORVU.MOREX.r2.1HG0056090	0.487886	Kinase family protein	Calmodulin
HORVU.MOREX.r2.6HG0494000	HORVU.MOREX.r2.1HG0056090	0.232544	Protein kinase family protein	Calmodulin
HORVU.MOREX.r2.3HG0226490	HORVU.MOREX.r2.1HG0056090	0.573468	Calcium-dependent protein kinase	Calmodulin
HORVU.MOREX.r2.3HG0242970	HORVU.MOREX.r2.1HG0056090	0.336506	LURP-one-like protein	Calmodulin
HORVU.MOREX.r2.5HG0429770	HORVU.MOREX.r2.1HG0056090	0.180811	Protein kinase family protein	Calmodulin
HORVU.MOREX.r2.1HG0019750	HORVU.MOREX.r2.1HG0056090	NA	AGAMOUS MADS box factor transcription factor	Calmodulin
HORVU.MOREX.r2.3HG0202320	HORVU.MOREX.r2.1HG0056090	0.118743	Agamous MADS-box transcription factor	Calmodulin
HORVU.MOREX.r2.5HG0405240	HORVU.MOREX.r2.1HG0056090	0.409402	Receptor protein kinase, putative	Calmodulin
HORVU.MOREX.r2.6HG0488950	HORVU.MOREX.r2.1HG0056090	0.31642	Kinase family protein	Calmodulin
HORVU.MOREX.r2.6HG0454570	HORVU.MOREX.r2.1HG0056090	0.355469	Kinase family protein	Calmodulin
HORVU.MOREX.r2.5HG0422910	HORVU.MOREX.r2.1HG0056090	NA	Transducin/WD40 repeat protein	Calmodulin
HORVU.MOREX.r2.5HG0425760	HORVU.MOREX.r2.1HG0056090	0.596843	Protein kinase	Calmodulin
HORVU.MOREX.r2.5HG0363830	HORVU.MOREX.r2.1HG0056090	0.550753	Pyrophosphate--fructose 6-phosphate 1-phosphotransferase subunit alpha	Calmodulin
HORVU.MOREX.r2.5HG0402830	HORVU.MOREX.r2.1HG0056090	0.333957	BZIP transcription factor	Calmodulin
HORVU.MOREX.r2.3HG0198600	HORVU.MOREX.r2.1HG0061210	0.847076	Syntaxin, putative	Coiled-coil domain-containing protein 47
HORVU.MOREX.r2.4HG0282910	HORVU.MOREX.r2.1HG0066230	NA	homeobox-1	WRKY transcription factor
HORVU.MOREX.r2.3HG0251360	HORVU.MOREX.r2.1HG0066230	NA	Wuschel-related homeobox protein	WRKY transcription factor
HORVU.MOREX.r2.4HG0278480	HORVU.MOREX.r2.1HG0066230	0.200967	Homeobox protein knotted-1-like 1	WRKY transcription factor
HORVU.MOREX.r2.7HG0535330	HORVU.MOREX.r2.1HG0066230	0.264968	NAC domain-containing protein	WRKY transcription factor
HORVU.MOREX.r2.7HG0584520	HORVU.MOREX.r2.1HG0066230	0.184104	NAC domain-containing protein, putative	WRKY transcription factor
HORVU.MOREX.r2.4HG0278420	HORVU.MOREX.r2.1HG0066230	NA	Homeobox protein knotted-1-like 1	WRKY transcription factor
HORVU.MOREX.r2.2HG0127090	HORVU.MOREX.r2.1HG0066230	0.152123	Homeobox protein knotted-1-like 1	WRKY transcription factor
HORVU.MOREX.r2.7HG0599740	HORVU.MOREX.r2.1HG0066230	0.655423	PLATZ transcription factor family protein	WRKY transcription factor
HORVU.MOREX.r2.7HG0535320	HORVU.MOREX.r2.1HG0066230	0.152584	NAC domain-containing protein, putative	WRKY transcription factor
HORVU.MOREX.r2.5HG0426660	HORVU.MOREX.r2.1HG0066230	NA	Homeobox protein knotted-1-like 1	WRKY transcription factor
HORVU.MOREX.r2.1HG0066990	HORVU.MOREX.r2.1HG0066990	1	Phosphotransferase	Phosphotransferase
HORVU.MOREX.r2.2HG0156810	HORVU.MOREX.r2.1HG0066990	0.391589	WD40 repeat-containing protein	Phosphotransferase
HORVU.MOREX.r2.6HG0526440	HORVU.MOREX.r2.1HG0071510	0.178055	Myosin heavy chain-related protein	Photosystem I reaction center subunit VI
HORVU.MOREX.r2.5HG0446800	HORVU.MOREX.r2.1HG0075440	0.394068	Exportin-1	Transcription elongation factor 1
HORVU.MOREX.r2.7HG0538000	HORVU.MOREX.r2.1HG0075440	0.349741	Kinase family protein	Transcription elongation factor 1
HORVU.MOREX.r2.2HG0092760	HORVU.MOREX.r2.1HG0075440	0.218187	Acyl-CoA dehydrogenase	Transcription elongation factor 1
HORVU.MOREX.r2.7HG0616150	HORVU.MOREX.r2.1HG0075440	0.327783	Transducin/WD40 repeat protein	Transcription elongation factor 1
HORVU.MOREX.r2.2HG0085780	HORVU.MOREX.r2.1HG0075440	0.336665	FACT complex subunit SPT16	Transcription elongation factor 1
HORVU.MOREX.r2.2HG0101410	HORVU.MOREX.r2.1HG0075440	0.216394	Histone acetyltransferase	Transcription elongation factor 1
HORVU.MOREX.r2.3HG0190930	HORVU.MOREX.r2.1HG0075440	0.23929	Transcription factor IWS1, putative	Transcription elongation factor 1
HORVU.MOREX.r2.6HG0483840	HORVU.MOREX.r2.2HG0079060	0.346699	Cyclic nucleotide-gated ion channel, putative	Ethylene receptor
HORVU.MOREX.r2.5HG0399300	HORVU.MOREX.r2.2HG0079060	0.47949	Glutamate receptor	Ethylene receptor
HORVU.MOREX.r2.2HG0145860	HORVU.MOREX.r2.2HG0079060	0.31438	Programmed cell death protein 4	Ethylene receptor
HORVU.MOREX.r2.5HG0356360	HORVU.MOREX.r2.2HG0079060	0.502668	Glutamate receptor	Ethylene receptor
HORVU.MOREX.r2.2HG0094680	HORVU.MOREX.r2.2HG0079060	0.663568	Sodium/hydrogen exchanger	Ethylene receptor
HORVU.MOREX.r2.5HG0399410	HORVU.MOREX.r2.2HG0079060	0.594327	Glutamate receptor	Ethylene receptor
HORVU.MOREX.r2.4HG0344150	HORVU.MOREX.r2.2HG0079060	0.365037	NAC domain protein,	Ethylene receptor
HORVU.MOREX.r2.6HG0516400	HORVU.MOREX.r2.2HG0079060	0.41017	Glutamate receptor	Ethylene receptor
HORVU.MOREX.r2.5HG0399370	HORVU.MOREX.r2.2HG0079060	0.579325	Glutamate receptor	Ethylene receptor
HORVU.MOREX.r2.5HG0431740	HORVU.MOREX.r2.2HG0079060	NA	Mannitol transporter, putative, expressed	Ethylene receptor
HORVU.MOREX.r2.1HG0016720	HORVU.MOREX.r2.2HG0079060	0.163753	Sodium/hydrogen exchanger	Ethylene receptor
HORVU.MOREX.r2.6HG0516450	HORVU.MOREX.r2.2HG0079060	0.382161	Glutamate receptor	Ethylene receptor
HORVU.MOREX.r2.7HG0547940	HORVU.MOREX.r2.2HG0079060	0.413403	Polyol transporter	Ethylene receptor
HORVU.MOREX.r2.3HG0258050	HORVU.MOREX.r2.2HG0079060	0.386568	NRT1/PTR family protein 2.2	Ethylene receptor
HORVU.MOREX.r2.5HG0387370	HORVU.MOREX.r2.2HG0079060	0.425825	Divalent metal cation transporter MntH 2	Ethylene receptor
HORVU.MOREX.r2.7HG0587840	HORVU.MOREX.r2.2HG0079060	0.760339	Cyclic nucleotide-gated ion channel-like protein	Ethylene receptor
HORVU.MOREX.r2.5HG0398650	HORVU.MOREX.r2.2HG0079060	0.592826	Auxin responsive SAUR protein	Ethylene receptor
HORVU.MOREX.r2.4HG0277180	HORVU.MOREX.r2.2HG0079060	0.251835	Protein kinase family protein	Ethylene receptor
HORVU.MOREX.r2.7HG0547730	HORVU.MOREX.r2.2HG0079060	0.39882	Glutamate receptor	Ethylene receptor
HORVU.MOREX.r2.5HG0399360	HORVU.MOREX.r2.2HG0079060	0.556585	Glutamate receptor	Ethylene receptor
HORVU.MOREX.r2.5HG0399420	HORVU.MOREX.r2.2HG0079060	0.275311	Glutamate receptor	Ethylene receptor
HORVU.MOREX.r2.5HG0399400	HORVU.MOREX.r2.2HG0079060	0.663081	Glutamate receptor	Ethylene receptor
HORVU.MOREX.r2.7HG0612230	HORVU.MOREX.r2.2HG0079060	0.123275	Programmed cell death protein 4	Ethylene receptor
HORVU.MOREX.r2.6HG0506560	HORVU.MOREX.r2.2HG0079060	NA	Ethylene receptor	Ethylene receptor
HORVU.MOREX.r2.4HG0303230	HORVU.MOREX.r2.2HG0079060	0.747287	Sodium/hydrogen exchanger	Ethylene receptor
HORVU.MOREX.r2.7HG0583780	HORVU.MOREX.r2.2HG0079060	0.410263	Programmed cell death protein 4	Ethylene receptor
HORVU.MOREX.r2.2HG0079060	HORVU.MOREX.r2.2HG0079060	1	Ethylene receptor	Ethylene receptor
HORVU.MOREX.r2.6HG0523500	HORVU.MOREX.r2.2HG0079060	0.262438	Ethylene receptor	Ethylene receptor
HORVU.MOREX.r2.5HG0399310	HORVU.MOREX.r2.2HG0079060	0.559242	Glutamate receptor	Ethylene receptor
HORVU.MOREX.r2.6HG0473200	HORVU.MOREX.r2.2HG0080060	0.21246	Receptor protein kinase, putative	Receptor-like protein kinase
HORVU.MOREX.r2.1HG0052870	HORVU.MOREX.r2.2HG0080060	0.254978	Receptor-like kinase	Receptor-like protein kinase
HORVU.MOREX.r2.1HG0049050	HORVU.MOREX.r2.2HG0080060	0.321786	Ran-binding protein 1 domain-containing	Receptor-like protein kinase
HORVU.MOREX.r2.4HG0329100	HORVU.MOREX.r2.2HG0080060	0.202665	Receptor-like kinase	Receptor-like protein kinase
HORVU.MOREX.r2.5HG0426920	HORVU.MOREX.r2.2HG0080060	0.424632	Non-specific serine/threonine protein kinase	Receptor-like protein kinase
HORVU.MOREX.r2.2HG0143470	HORVU.MOREX.r2.2HG0080060	0.320216	Receptor-like kinase	Receptor-like protein kinase
HORVU.MOREX.r2.6HG0475440	HORVU.MOREX.r2.2HG0080060	0.452216	Receptor-like kinase	Receptor-like protein kinase
HORVU.MOREX.r2.7HG0607290	HORVU.MOREX.r2.2HG0080060	0.214355	Ran-binding protein 1 domain-containing	Receptor-like protein kinase
HORVU.MOREX.r2.3HG0258570	HORVU.MOREX.r2.2HG0080060	0.182292	Receptor-like kinase	Receptor-like protein kinase
HORVU.MOREX.r2.4HG0314920	HORVU.MOREX.r2.2HG0080060	0.403529	Receptor-like protein kinase	Receptor-like protein kinase
HORVU.MOREX.r2.7HG0618940	HORVU.MOREX.r2.2HG0080060	0.139043	Receptor protein kinase-like protein	Receptor-like protein kinase
HORVU.MOREX.r2.5HG0393010	HORVU.MOREX.r2.2HG0080060	0.367222	Protein kinase, putative	Receptor-like protein kinase
HORVU.MOREX.r2.2HG0146410	HORVU.MOREX.r2.2HG0080060	0.545123	Receptor-like kinase	Receptor-like protein kinase
HORVU.MOREX.r2.6HG0448620	HORVU.MOREX.r2.2HG0080060	0.492753	Protein kinase, putative	Receptor-like protein kinase
HORVU.MOREX.r2.3HG0246390	HORVU.MOREX.r2.2HG0080060	0.157735	Protein kinase, putative	Receptor-like protein kinase
HORVU.MOREX.r2.7HG0604110	HORVU.MOREX.r2.2HG0080060	0.160394	Receptor-like kinase	Receptor-like protein kinase
HORVU.MOREX.r2.4HG0286970	HORVU.MOREX.r2.2HG0080060	0.505386	Receptor-like kinase	Receptor-like protein kinase
HORVU.MOREX.r2.5HG0405240	HORVU.MOREX.r2.2HG0080060	0.286679	Receptor protein kinase, putative	Receptor-like protein kinase
HORVU.MOREX.r2.3HG0247880	HORVU.MOREX.r2.2HG0080060	0.287191	Receptor-like protein kinase	Receptor-like protein kinase
HORVU.MOREX.r2.7HG0562040	HORVU.MOREX.r2.2HG0080060	0.152945	Receptor protein kinase, putative	Receptor-like protein kinase
HORVU.MOREX.r2.3HG0194360	HORVU.MOREX.r2.2HG0080060	0.335006	Receptor protein kinase, putative	Receptor-like protein kinase
HORVU.MOREX.r2.7HG0535460	HORVU.MOREX.r2.2HG0080060	0.401552	Receptor protein kinase	Receptor-like protein kinase
HORVU.MOREX.r2.4HG0281220	HORVU.MOREX.r2.2HG0080060	0.52977	Receptor-like kinase	Receptor-like protein kinase
HORVU.MOREX.r2.3HG0246490	HORVU.MOREX.r2.2HG0080060	0.428419	Protein kinase, putative	Receptor-like protein kinase
HORVU.MOREX.r2.4HG0342250	HORVU.MOREX.r2.2HG0080060	0.408021	Receptor-like kinase	Receptor-like protein kinase
HORVU.MOREX.r2.2HG0126990	HORVU.MOREX.r2.2HG0080060	0.490906	Non-specific serine/threonine protein kinase	Receptor-like protein kinase
HORVU.MOREX.r2.1HG0078580	HORVU.MOREX.r2.2HG0080060	0.184784	Non-specific serine/threonine protein kinase	Receptor-like protein kinase
HORVU.MOREX.r2.5HG0349900	HORVU.MOREX.r2.2HG0080060	0.273027	Receptor-like protein kinase	Receptor-like protein kinase
HORVU.MOREX.r2.5HG0392950	HORVU.MOREX.r2.2HG0080060	0.37619	Protein kinase, putative	Receptor-like protein kinase
HORVU.MOREX.r2.2HG0138120	HORVU.MOREX.r2.1HG0057070	0.176118	Ring finger protein, putative	Ubiquitin-conjugating enzyme E2
HORVU.MOREX.r2.7HG0552250	HORVU.MOREX.r2.1HG0057070	0.425205	Membrane-anchored ubiquitin-fold protein	Ubiquitin-conjugating enzyme E2
HORVU.MOREX.r2.1HG0051000	HORVU.MOREX.r2.1HG0057070	0.170895	RING/U-box superfamily protein	Ubiquitin-conjugating enzyme E2
HORVU.MOREX.r2.7HG0584970	HORVU.MOREX.r2.1HG0057070	0.371153	E3 ubiquitin-protein ligase CHIP	Ubiquitin-conjugating enzyme E2
HORVU.MOREX.r2.1HG0069340	HORVU.MOREX.r2.1HG0057070	0.371771	Guanine nucleotide-binding protein subunit beta-1	Ubiquitin-conjugating enzyme E2
HORVU.MOREX.r2.2HG0134900	HORVU.MOREX.r2.1HG0057070	0.447644	Membrane-anchored ubiquitin-fold protein	Ubiquitin-conjugating enzyme E2
HORVU.MOREX.r2.1HG0051410	HORVU.MOREX.r2.1HG0057070	0.192373	Kinase family protein	Ubiquitin-conjugating enzyme E2
HORVU.MOREX.r2.1HG0001980	HORVU.MOREX.r2.1HG0057070	0.399631	U-box domain-containing protein 1	Ubiquitin-conjugating enzyme E2
HORVU.MOREX.r2.3HG0232920	HORVU.MOREX.r2.1HG0057070	0.470122	Guanine nucleotide-binding protein beta subunit-like protein	Ubiquitin-conjugating enzyme E2
HORVU.MOREX.r2.6HG0509610	HORVU.MOREX.r2.1HG0057070	0.260331	Membrane-anchored ubiquitin-fold protein	Ubiquitin-conjugating enzyme E2
HORVU.MOREX.r2.2HG0082260	HORVU.MOREX.r2.2HG0091560	0.539262	Carboxymethylenebutenolidase-like protein	NADH-cytochrome b5 reductase
HORVU.MOREX.r2.3HG0194870	HORVU.MOREX.r2.2HG0091560	0.328662	Carboxymethylenebutenolidase 1	NADH-cytochrome b5 reductase
HORVU.MOREX.r2.4HG0295090	HORVU.MOREX.r2.2HG0091560	0.744435	NAD(P)-binding Rossmann-fold superfamily protein	NADH-cytochrome b5 reductase
HORVU.MOREX.r2.3HG0204200	HORVU.MOREX.r2.2HG0091560	0.309535	Cytochrome P450	NADH-cytochrome b5 reductase
HORVU.MOREX.r2.7HG0580380	HORVU.MOREX.r2.2HG0102030	NA	WAT1-related protein	Signal peptidase subunit-12
HORVU.MOREX.r2.1HG0011260	HORVU.MOREX.r2.2HG0102030	0.49438	Tetraspanin family protein	Signal peptidase subunit-12
HORVU.MOREX.r2.3HG0258980	HORVU.MOREX.r2.2HG0102030	0.32068	Auxin efflux carrier component	Signal peptidase subunit-12
HORVU.MOREX.r2.7HG0529500	HORVU.MOREX.r2.2HG0102030	0.422726	WAT1-related protein	Signal peptidase subunit-12
HORVU.MOREX.r2.6HG0451800	HORVU.MOREX.r2.2HG0102030	0.301602	Receptor-like protein kinase	Signal peptidase subunit-12
HORVU.MOREX.r2.1HG0050080	HORVU.MOREX.r2.2HG0102030	0.663736	Resistance to phytophthora 1 protein	Signal peptidase subunit-12
HORVU.MOREX.r2.5HG0393010	HORVU.MOREX.r2.2HG0102030	0.343832	Protein kinase, putative	Signal peptidase subunit-12
HORVU.MOREX.r2.6HG0449480	HORVU.MOREX.r2.2HG0102030	0.234261	WAT1-related protein	Signal peptidase subunit-12
HORVU.MOREX.r2.5HG0423360	HORVU.MOREX.r2.2HG0102030	0.725249	Magnesium transporter MRS2-like protein	Signal peptidase subunit-12
HORVU.MOREX.r2.6HG0522140	HORVU.MOREX.r2.2HG0102030	NA	transmembrane protein, putative (DUF679)	Signal peptidase subunit-12
HORVU.MOREX.r2.3HG0246390	HORVU.MOREX.r2.2HG0102030	0.212049	Protein kinase, putative	Signal peptidase subunit-12
HORVU.MOREX.r2.1HG0027540	HORVU.MOREX.r2.2HG0102030	0.61756	RING finger protein	Signal peptidase subunit-12
HORVU.MOREX.r2.2HG0157420	HORVU.MOREX.r2.2HG0102030	NA	Peptide transporter	Signal peptidase subunit-12
HORVU.MOREX.r2.6HG0496560	HORVU.MOREX.r2.2HG0102030	0.244477	Cysteine-rich repeat secretory protein	Signal peptidase subunit-12
HORVU.MOREX.r2.2HG0083570	HORVU.MOREX.r2.2HG0102030	NA	NRT1/PTR family protein 2.2	Signal peptidase subunit-12
HORVU.MOREX.r2.1HG0066850	HORVU.MOREX.r2.2HG0102030	0.722795	Glycerophosphodiester phosphodiesterase	Signal peptidase subunit-12
HORVU.MOREX.r2.2HG0156840	HORVU.MOREX.r2.2HG0102030	0.392949	Protein TRIGALACTOSYLDIACYLGLYCEROL 1, chloroplastic	Signal peptidase subunit-12
HORVU.MOREX.r2.7HG0537760	HORVU.MOREX.r2.2HG0102030	0.466506	NRT1/PTR family protein 2.2	Signal peptidase subunit-12
HORVU.MOREX.r2.6HG0499320	HORVU.MOREX.r2.2HG0102030	0.432872	Aquaporin	Signal peptidase subunit-12
HORVU.MOREX.r2.2HG0110730	HORVU.MOREX.r2.2HG0102030	0.811927	Protein DETOXIFICATION	Signal peptidase subunit-12
HORVU.MOREX.r2.3HG0206910	HORVU.MOREX.r2.2HG0102030	NA	Aquaporin-like protein	Signal peptidase subunit-12
HORVU.MOREX.r2.3HG0270990	HORVU.MOREX.r2.2HG0102030	0.572046	Alkaline phytoceramidase (APHC)	Signal peptidase subunit-12
HORVU.MOREX.r2.7HG0543340	HORVU.MOREX.r2.2HG0102030	0.134932	NRT1/PTR family protein 2.2	Signal peptidase subunit-12
HORVU.MOREX.r2.1HG0047070	HORVU.MOREX.r2.2HG0102030	0.559545	Signal peptidase I	Signal peptidase subunit-12
HORVU.MOREX.r2.4HG0333940	HORVU.MOREX.r2.2HG0102030	0.541988	ABC transporter G family member	Signal peptidase subunit-12
HORVU.MOREX.r2.3HG0226300	HORVU.MOREX.r2.2HG0102030	0.408018	Amino acid transporter family protein	Signal peptidase subunit-12
HORVU.MOREX.r2.5HG0424570	HORVU.MOREX.r2.2HG0102030	0.547497	Potassium channel	Signal peptidase subunit-12
HORVU.MOREX.r2.5HG0391620	HORVU.MOREX.r2.2HG0102030	0.154431	Aquaporin	Signal peptidase subunit-12
HORVU.MOREX.r2.7HG0562040	HORVU.MOREX.r2.2HG0102030	0.135925	Receptor protein kinase, putative	Signal peptidase subunit-12
HORVU.MOREX.r2.7HG0621790	HORVU.MOREX.r2.2HG0102030	NA	transmembrane protein, putative (DUF679)	Signal peptidase subunit-12
HORVU.MOREX.r2.2HG0125890	HORVU.MOREX.r2.2HG0102030	0.393229	Transporter	Signal peptidase subunit-12
HORVU.MOREX.r2.1HG0055300	HORVU.MOREX.r2.2HG0102030	NA	transmembrane protein, putative (DUF679)	Signal peptidase subunit-12
HORVU.MOREX.r2.3HG0264880	HORVU.MOREX.r2.2HG0102030	0.591679	Phosphate transporter	Signal peptidase subunit-12
HORVU.MOREX.r2.1HG0021280	HORVU.MOREX.r2.2HG0102030	0.252439	Phosphate translocator	Signal peptidase subunit-12
HORVU.MOREX.r2.1HG0006150	HORVU.MOREX.r2.2HG0102030	0.243952	Protein DETOXIFICATION	Signal peptidase subunit-12
HORVU.MOREX.r2.5HG0405240	HORVU.MOREX.r2.2HG0102030	0.416227	Receptor protein kinase, putative	Signal peptidase subunit-12
HORVU.MOREX.r2.6HG0459740	HORVU.MOREX.r2.2HG0102030	0.341999	Transmembrane protein, putative	Signal peptidase subunit-12
HORVU.MOREX.r2.5HG0423560	HORVU.MOREX.r2.2HG0102030	0.315272	Zinc-transporting ATPase	Signal peptidase subunit-12
HORVU.MOREX.r2.1HG0053940	HORVU.MOREX.r2.2HG0102030	0.894511	1-acyl-sn-glycerol-3-phosphate acyltransferase	Signal peptidase subunit-12
HORVU.MOREX.r2.5HG0399610	HORVU.MOREX.r2.2HG0102030	0.236738	Early light-induced protein	Signal peptidase subunit-12
HORVU.MOREX.r2.UnG0631470	HORVU.MOREX.r2.2HG0102030	0.190766	Early light-induced protein	Signal peptidase subunit-12
HORVU.MOREX.r2.6HG0523590	HORVU.MOREX.r2.2HG0102030	NA	Protein DETOXIFICATION	Signal peptidase subunit-12
HORVU.MOREX.r2.1HG0002970	HORVU.MOREX.r2.2HG0102030	NA	Protein DETOXIFICATION	Signal peptidase subunit-12
HORVU.MOREX.r2.5HG0401680	HORVU.MOREX.r2.2HG0102030	0.263932	Transmembrane protein 45B	Signal peptidase subunit-12
HORVU.MOREX.r2.5HG0424900	HORVU.MOREX.r2.2HG0102030	0.232133	Transmembrane protein adipocyte-associated 1	Signal peptidase subunit-12
HORVU.MOREX.r2.7HG0599010	HORVU.MOREX.r2.2HG0102030	0.411199	extracellular ligand-gated ion channel protein (DUF3537)	Signal peptidase subunit-12
HORVU.MOREX.r2.2HG0148770	HORVU.MOREX.r2.2HG0102030	0.204035	transmembrane protein, putative (DUF247)	Signal peptidase subunit-12
HORVU.MOREX.r2.6HG0515900	HORVU.MOREX.r2.2HG0102030	0.655196	Pyrophosphate-energized vacuolar membrane proton pump	Signal peptidase subunit-12
HORVU.MOREX.r2.3HG0270740	HORVU.MOREX.r2.2HG0102030	0.203948	Auxin efflux carrier component	Signal peptidase subunit-12
HORVU.MOREX.r2.7HG0613640	HORVU.MOREX.r2.2HG0102030	0.853913	transmembrane protein, putative (DUF679)	Signal peptidase subunit-12
HORVU.MOREX.r2.7HG0593030	HORVU.MOREX.r2.2HG0102030	0.735496	UDP-galactose transporter, putative	Signal peptidase subunit-12
HORVU.MOREX.r2.5HG0392950	HORVU.MOREX.r2.2HG0102030	0.42477	Protein kinase, putative	Signal peptidase subunit-12
HORVU.MOREX.r2.4HG0277550	HORVU.MOREX.r2.2HG0102030	0.39406	Potassium channel	Signal peptidase subunit-12
HORVU.MOREX.r2.7HG0610610	HORVU.MOREX.r2.2HG0102030	0.389859	Dolichyl-diphosphooligosaccharide--protein glycosyltransferase subunit DAD1	Signal peptidase subunit-12
HORVU.MOREX.r2.2HG0146410	HORVU.MOREX.r2.2HG0102030	0.800678	Receptor-like kinase	Signal peptidase subunit-12
HORVU.MOREX.r2.2HG0107810	HORVU.MOREX.r2.2HG0102030	NA	Cytochrome b561 and DOMON domain-containing protein	Signal peptidase subunit-12
HORVU.MOREX.r2.7HG0563000	HORVU.MOREX.r2.2HG0102030	0.335553	Protein DETOXIFICATION	Signal peptidase subunit-12
HORVU.MOREX.r2.6HG0522160	HORVU.MOREX.r2.2HG0102030	0.815204	transmembrane protein, putative (DUF679)	Signal peptidase subunit-12
HORVU.MOREX.r2.7HG0534430	HORVU.MOREX.r2.2HG0102030	0.728889	LMBR1-like membrane protein	Signal peptidase subunit-12
HORVU.MOREX.r2.3HG0257630	HORVU.MOREX.r2.2HG0102030	0.437326	Fiber protein Fb34	Signal peptidase subunit-12
HORVU.MOREX.r2.1HG0070410	HORVU.MOREX.r2.2HG0102030	NA	Purine permease	Signal peptidase subunit-12
HORVU.MOREX.r2.5HG0407660	HORVU.MOREX.r2.2HG0102030	0.39169	plant/protein (Protein of unknown function, DUF599)	Signal peptidase subunit-12
HORVU.MOREX.r2.2HG0148310	HORVU.MOREX.r2.2HG0102030	0.275639	Organic solute transporter-like	Signal peptidase subunit-12
HORVU.MOREX.r2.7HG0588100	HORVU.MOREX.r2.2HG0102030	0.695611	Glucan endo-1,3-beta-glucosidase, putative	Signal peptidase subunit-12
HORVU.MOREX.r2.5HG0409460	HORVU.MOREX.r2.2HG0102030	NA	Auxin efflux carrier component	Signal peptidase subunit-12
HORVU.MOREX.r2.1HG0069800	HORVU.MOREX.r2.2HG0102030	0.304643	Protein DETOXIFICATION	Signal peptidase subunit-12
HORVU.MOREX.r2.5HG0401690	HORVU.MOREX.r2.2HG0102030	0.857874	Transmembrane protein 45B	Signal peptidase subunit-12
HORVU.MOREX.r2.5HG0392210	HORVU.MOREX.r2.2HG0102030	0.298596	RING/U-box superfamily protein	Signal peptidase subunit-12
HORVU.MOREX.r2.3HG0232250	HORVU.MOREX.r2.2HG0102030	0.37559	Purine permease	Signal peptidase subunit-12
HORVU.MOREX.r2.2HG0142800	HORVU.MOREX.r2.2HG0102030	0.698191	Endoplasmic reticulum-Golgi intermediate compartment protein 3	Signal peptidase subunit-12
HORVU.MOREX.r2.5HG0370810	HORVU.MOREX.r2.2HG0102030	0.31442	Dicarboxylate transporter 2.1, chloroplastic	Signal peptidase subunit-12
HORVU.MOREX.r2.5HG0419570	HORVU.MOREX.r2.2HG0102030	0.874763	Transmembrane 9 superfamily member	Signal peptidase subunit-12
HORVU.MOREX.r2.3HG0202960	HORVU.MOREX.r2.2HG0102030	0.609035	Alkaline phytoceramidase (APHC)	Signal peptidase subunit-12
HORVU.MOREX.r2.3HG0206170	HORVU.MOREX.r2.2HG0102030	0.499231	Reticulon-like protein	Signal peptidase subunit-12
HORVU.MOREX.r2.2HG0097620	HORVU.MOREX.r2.2HG0102030	0.395462	Protein DETOXIFICATION	Signal peptidase subunit-12
HORVU.MOREX.r2.5HG0400090	HORVU.MOREX.r2.2HG0102030	0.321573	Cellulose synthase	Signal peptidase subunit-12
HORVU.MOREX.r2.7HG0529000	HORVU.MOREX.r2.2HG0102030	0.496536	WAT1-related protein	Signal peptidase subunit-12
HORVU.MOREX.r2.2HG0118280	HORVU.MOREX.r2.2HG0102030	NA	WAT1-related protein	Signal peptidase subunit-12
HORVU.MOREX.r2.5HG0414770	HORVU.MOREX.r2.2HG0102030	0.746586	Protein DETOXIFICATION	Signal peptidase subunit-12
HORVU.MOREX.r2.5HG0354890	HORVU.MOREX.r2.2HG0102030	0.212171	Protein DETOXIFICATION	Signal peptidase subunit-12
HORVU.MOREX.r2.2HG0117650	HORVU.MOREX.r2.2HG0102030	0.341522	Organic solute transporter-like	Signal peptidase subunit-12
HORVU.MOREX.r2.5HG0399570	HORVU.MOREX.r2.2HG0102030	0.349893	Early light-induced protein	Signal peptidase subunit-12
HORVU.MOREX.r2.4HG0279230	HORVU.MOREX.r2.2HG0102030	0.814066	NRT1/PTR family protein 2.2	Signal peptidase subunit-12
HORVU.MOREX.r2.3HG0198850	HORVU.MOREX.r2.2HG0102030	0.604802	RING/U-box superfamily protein	Signal peptidase subunit-12
HORVU.MOREX.r2.1HG0060180	HORVU.MOREX.r2.2HG0102030	NA	Auxin influx transporter	Signal peptidase subunit-12
HORVU.MOREX.r2.4HG0347430	HORVU.MOREX.r2.2HG0102030	NA	Peptide transporter, putative	Signal peptidase subunit-12
HORVU.MOREX.r2.5HG0399580	HORVU.MOREX.r2.2HG0102030	0.195427	Early light-induced protein	Signal peptidase subunit-12
HORVU.MOREX.r2.4HG0344600	HORVU.MOREX.r2.2HG0102030	0.909288	UDP-galactose transporter	Signal peptidase subunit-12
HORVU.MOREX.r2.7HG0579490	HORVU.MOREX.r2.2HG0102030	0.256235	Transmembrane 9 superfamily member	Signal peptidase subunit-12
HORVU.MOREX.r2.5HG0432540	HORVU.MOREX.r2.2HG0102030	0.546756	Protein REVERSION-TO-ETHYLENE SENSITIVITY1	Signal peptidase subunit-12
HORVU.MOREX.r2.5HG0423810	HORVU.MOREX.r2.2HG0102030	0.649205	Tryptophan RNA-binding attenuator-like protein	Signal peptidase subunit-12
HORVU.MOREX.r2.4HG0344040	HORVU.MOREX.r2.2HG0102030	0.476436	Aquaporin-like protein	Signal peptidase subunit-12
HORVU.MOREX.r2.6HG0523580	HORVU.MOREX.r2.2HG0102030	0.477838	Protein DETOXIFICATION	Signal peptidase subunit-12
HORVU.MOREX.r2.5HG0399500	HORVU.MOREX.r2.2HG0102030	0.230578	Early light-induced protein	Signal peptidase subunit-12
HORVU.MOREX.r2.3HG0228010	HORVU.MOREX.r2.2HG0102030	0.170074	Auxin efflux carrier component	Signal peptidase subunit-12
HORVU.MOREX.r2.5HG0445510	HORVU.MOREX.r2.2HG0102030	0.748016	Derlin	Signal peptidase subunit-12
HORVU.MOREX.r2.4HG0347350	HORVU.MOREX.r2.2HG0102030	0.313053	Post-GPI attachment to proteins factor 3	Signal peptidase subunit-12
HORVU.MOREX.r2.5HG0399450	HORVU.MOREX.r2.2HG0102030	0.292001	Early light-induced protein	Signal peptidase subunit-12
HORVU.MOREX.r2.6HG0475380	HORVU.MOREX.r2.2HG0102030	0.228325	Receptor-like protein kinase	Signal peptidase subunit-12
HORVU.MOREX.r2.2HG0129090	HORVU.MOREX.r2.2HG0102030	0.606251	Protein DETOXIFICATION	Signal peptidase subunit-12
HORVU.MOREX.r2.2HG0116210	HORVU.MOREX.r2.2HG0102030	0.57699	Protein DETOXIFICATION	Signal peptidase subunit-12
HORVU.MOREX.r2.2HG0147120	HORVU.MOREX.r2.2HG0102030	0.521489	Transporter	Signal peptidase subunit-12
HORVU.MOREX.r2.6HG0498140	HORVU.MOREX.r2.2HG0102030	NA	Aquaporin	Signal peptidase subunit-12
HORVU.MOREX.r2.7HG0543350	HORVU.MOREX.r2.2HG0102030	0.19482	Protein NRT1/ PTR FAMILY 2.3	Signal peptidase subunit-12
HORVU.MOREX.r2.5HG0355760	HORVU.MOREX.r2.2HG0102030	0.355408	Bidirectional sugar transporter SWEET	Signal peptidase subunit-12
HORVU.MOREX.r2.4HG0339130	HORVU.MOREX.r2.2HG0102030	NA	Receptor-like protein kinase	Signal peptidase subunit-12
HORVU.MOREX.r2.7HG0621810	HORVU.MOREX.r2.2HG0102030	0.484531	transmembrane protein, putative (DUF679)	Signal peptidase subunit-12
HORVU.MOREX.r2.5HG0394620	HORVU.MOREX.r2.2HG0102030	0.648061	Transporter-related family protein	Signal peptidase subunit-12
HORVU.MOREX.r2.4HG0280520	HORVU.MOREX.r2.2HG0102030	0.767035	SNARE associated Golgi protein family	Signal peptidase subunit-12
HORVU.MOREX.r2.1HG0076620	HORVU.MOREX.r2.2HG0102030	0.407948	Amino acid transporter family protein	Signal peptidase subunit-12
HORVU.MOREX.r2.7HG0617870	HORVU.MOREX.r2.2HG0102030	0.300471	Er membrane protein complex subunit 7-like protein	Signal peptidase subunit-12
HORVU.MOREX.r2.3HG0249370	HORVU.MOREX.r2.2HG0102030	0.673037	Embryogenesis-associated protein EMB8	Signal peptidase subunit-12
HORVU.MOREX.r2.5HG0434680	HORVU.MOREX.r2.2HG0102030	0.502904	Cellulose synthase	Signal peptidase subunit-12
HORVU.MOREX.r2.5HG0380200	HORVU.MOREX.r2.2HG0102030	0.639368	Peptidylprolyl isomerase	Signal peptidase subunit-12
HORVU.MOREX.r2.7HG0530900	HORVU.MOREX.r2.2HG0102030	0.582877	Dolichyl-diphosphooligosaccharide--protein glycosyltransferase subunit DAD1	Signal peptidase subunit-12
HORVU.MOREX.r2.4HG0332820	HORVU.MOREX.r2.2HG0102030	0.897155	Cytochrome b561 and DOMON domain-containing protein	Signal peptidase subunit-12
HORVU.MOREX.r2.1HG0070430	HORVU.MOREX.r2.2HG0102030	0.187254	Purine permease	Signal peptidase subunit-12
HORVU.MOREX.r2.5HG0349820	HORVU.MOREX.r2.2HG0102030	0.366331	NRT1/PTR family protein 2.2	Signal peptidase subunit-12
HORVU.MOREX.r2.2HG0141910	HORVU.MOREX.r2.2HG0102030	0.193833	extracellular ligand-gated ion channel protein (DUF3537)	Signal peptidase subunit-12
HORVU.MOREX.r2.7HG0594310	HORVU.MOREX.r2.2HG0102030	0.285633	Tetraspanin family protein	Signal peptidase subunit-12
HORVU.MOREX.r2.6HG0473200	HORVU.MOREX.r2.2HG0102030	0.1785	Receptor protein kinase, putative	Signal peptidase subunit-12
HORVU.MOREX.r2.7HG0565500	HORVU.MOREX.r2.2HG0102030	NA	plant/protein (Protein of unknown function, DUF599)	Signal peptidase subunit-12
HORVU.MOREX.r2.4HG0321420	HORVU.MOREX.r2.2HG0102030	0.235234	ABC transporter G family member	Signal peptidase subunit-12
HORVU.MOREX.r2.1HG0021470	HORVU.MOREX.r2.2HG0102030	0.560258	RING/U-box superfamily protein	Signal peptidase subunit-12
HORVU.MOREX.r2.7HG0534930	HORVU.MOREX.r2.2HG0102030	NA	Sulfite exporter TauE/SafE family protein, putative	Signal peptidase subunit-12
HORVU.MOREX.r2.6HG0516700	HORVU.MOREX.r2.2HG0102030	0.266273	Protein DETOXIFICATION	Signal peptidase subunit-12
HORVU.MOREX.r2.5HG0441500	HORVU.MOREX.r2.2HG0102030	0.600662	Post-GPI attachment to proteins factor 3	Signal peptidase subunit-12
HORVU.MOREX.r2.4HG0298100	HORVU.MOREX.r2.2HG0102030	0.194451	Proline transporter	Signal peptidase subunit-12
HORVU.MOREX.r2.1HG0075170	HORVU.MOREX.r2.2HG0102030	0.229983	Auxin efflux carrier component	Signal peptidase subunit-12
HORVU.MOREX.r2.5HG0399590	HORVU.MOREX.r2.2HG0102030	0.221797	Early light-induced protein	Signal peptidase subunit-12
HORVU.MOREX.r2.4HG0339290	HORVU.MOREX.r2.2HG0102030	0.367519	Aquaporin	Signal peptidase subunit-12
HORVU.MOREX.r2.6HG0513820	HORVU.MOREX.r2.2HG0102030	0.428346	Sugar transporter family protein	Signal peptidase subunit-12
HORVU.MOREX.r2.4HG0321710	HORVU.MOREX.r2.2HG0102030	0.679943	Ankyrin repeat-containing protein	Signal peptidase subunit-12
HORVU.MOREX.r2.6HG0448620	HORVU.MOREX.r2.2HG0102030	0.676139	Protein kinase, putative	Signal peptidase subunit-12
HORVU.MOREX.r2.2HG0149910	HORVU.MOREX.r2.2HG0102030	NA	Transporter	Signal peptidase subunit-12
HORVU.MOREX.r2.3HG0214260	HORVU.MOREX.r2.2HG0102030	NA	WAT1-related protein	Signal peptidase subunit-12
HORVU.MOREX.r2.4HG0321150	HORVU.MOREX.r2.2HG0102030	0.483157	CDP-diacylglycerol--glycerol-3-phosphate 3-phosphatidyltransferase	Signal peptidase subunit-12
HORVU.MOREX.r2.4HG0339940	HORVU.MOREX.r2.2HG0102030	0.825346	HR-like lesion-inducing protein-related protein	Signal peptidase subunit-12
HORVU.MOREX.r2.3HG0246490	HORVU.MOREX.r2.2HG0102030	0.580619	Protein kinase, putative	Signal peptidase subunit-12
HORVU.MOREX.r2.1HG0070460	HORVU.MOREX.r2.2HG0102030	NA	Purine permease	Signal peptidase subunit-12
HORVU.MOREX.r2.1HG0061230	HORVU.MOREX.r2.2HG0102030	0.636615	Embryogenesis-associated protein EMB8	Signal peptidase subunit-12
HORVU.MOREX.r2.1HG0063620	HORVU.MOREX.r2.2HG0102030	0.740287	Phosphate transporter	Signal peptidase subunit-12
HORVU.MOREX.r2.6HG0516170	HORVU.MOREX.r2.2HG0102030	0.454051	RING/U-box superfamily protein	Signal peptidase subunit-12
HORVU.MOREX.r2.5HG0385500	HORVU.MOREX.r2.2HG0102030	0.236292	Protein NRT1/ PTR FAMILY 2.1	Signal peptidase subunit-12
HORVU.MOREX.r2.2HG0083720	HORVU.MOREX.r2.2HG0102030	0.727105	Sugar transporter, putative	Signal peptidase subunit-12
HORVU.MOREX.r2.3HG0205390	HORVU.MOREX.r2.2HG0102030	0.546735	Gdt1-like protein chloroplastic-like	Signal peptidase subunit-12
HORVU.MOREX.r2.4HG0324250	HORVU.MOREX.r2.2HG0102030	0.329434	LAG1 longevity assurance-like protein	Signal peptidase subunit-12
HORVU.MOREX.r2.1HG0020690	HORVU.MOREX.r2.2HG0102030	0.608229	RING finger protein	Signal peptidase subunit-12
HORVU.MOREX.r2.3HG0240960	HORVU.MOREX.r2.2HG0102030	0.61139	Phosphatidate cytidylyltransferase	Signal peptidase subunit-12
HORVU.MOREX.r2.4HG0295800	HORVU.MOREX.r2.2HG0102030	0.726938	Protein DETOXIFICATION	Signal peptidase subunit-12
HORVU.MOREX.r2.4HG0309400	HORVU.MOREX.r2.2HG0102030	0.542984	TVP38/TMEM64 family membrane protein	Signal peptidase subunit-12
HORVU.MOREX.r2.7HG0612020	HORVU.MOREX.r2.2HG0102030	NA	WAT1-related protein	Signal peptidase subunit-12
HORVU.MOREX.r2.1HG0059860	HORVU.MOREX.r2.2HG0102030	NA	Auxin efflux carrier component	Signal peptidase subunit-12
HORVU.MOREX.r2.4HG0280190	HORVU.MOREX.r2.2HG0102030	0.344894	Elongation of very long chain fatty acids protein 3	Signal peptidase subunit-12
HORVU.MOREX.r2.3HG0192310	HORVU.MOREX.r2.2HG0102030	0.209386	Major facilitator superfamily protein	Signal peptidase subunit-12
HORVU.MOREX.r2.2HG0091570	HORVU.MOREX.r2.2HG0102030	0.355642	Cellulose synthase	Signal peptidase subunit-12
HORVU.MOREX.r2.4HG0328220	HORVU.MOREX.r2.2HG0102030	0.621134	Protein DETOXIFICATION	Signal peptidase subunit-12
HORVU.MOREX.r2.7HG0558250	HORVU.MOREX.r2.2HG0102030	0.203279	Aquaporin	Signal peptidase subunit-12
HORVU.MOREX.r2.3HG0251160	HORVU.MOREX.r2.2HG0102030	0.475054	Auxin influx transporter	Signal peptidase subunit-12
HORVU.MOREX.r2.7HG0612430	HORVU.MOREX.r2.2HG0102030	NA	Protein DETOXIFICATION	Signal peptidase subunit-12
HORVU.MOREX.r2.2HG0152770	HORVU.MOREX.r2.2HG0102030	0.377845	Cysteine-rich repeat secretory protein	Signal peptidase subunit-12
HORVU.MOREX.r2.6HG0489200	HORVU.MOREX.r2.2HG0102030	0.685011	Alkaline phosphatase D	Signal peptidase subunit-12
HORVU.MOREX.r2.5HG0367400	HORVU.MOREX.r2.2HG0102030	0.473232	Lysine/histidine transporter	Signal peptidase subunit-12
HORVU.MOREX.r2.3HG0200760	HORVU.MOREX.r2.2HG0102030	0.477915	Triose phosphate/phosphate translocator, chloroplastic	Signal peptidase subunit-12
HORVU.MOREX.r2.6HG0522040	HORVU.MOREX.r2.2HG0102030	0.377873	Receptor-like kinase	Signal peptidase subunit-12
HORVU.MOREX.r2.2HG0138120	HORVU.MOREX.r2.2HG0102030	0.530827	Ring finger protein, putative	Signal peptidase subunit-12
HORVU.MOREX.r2.4HG0327430	HORVU.MOREX.r2.2HG0102030	0.827247	Transmembrane 9 superfamily member	Signal peptidase subunit-12
HORVU.MOREX.r2.7HG0558270	HORVU.MOREX.r2.2HG0102030	0.510938	Receptor-like protein kinase	Signal peptidase subunit-12
HORVU.MOREX.r2.3HG0269880	HORVU.MOREX.r2.2HG0102030	0.215431	Protein DETOXIFICATION	Signal peptidase subunit-12
HORVU.MOREX.r2.1HG0025520	HORVU.MOREX.r2.2HG0102030	0.316482	ABC transporter G family member	Signal peptidase subunit-12
HORVU.MOREX.r2.4HG0344570	HORVU.MOREX.r2.2HG0102030	0.631866	Post-GPI attachment to proteins factor 3	Signal peptidase subunit-12
HORVU.MOREX.r2.7HG0538510	HORVU.MOREX.r2.2HG0102030	NA	WAT1-related protein	Signal peptidase subunit-12
HORVU.MOREX.r2.2HG0151890	HORVU.MOREX.r2.2HG0102030	0.197584	ABC transporter G family member	Signal peptidase subunit-12
HORVU.MOREX.r2.7HG0623060	HORVU.MOREX.r2.2HG0102030	0.476268	Aquaporin	Signal peptidase subunit-12
HORVU.MOREX.r2.6HG0449580	HORVU.MOREX.r2.2HG0102030	0.728784	WAT1-related protein	Signal peptidase subunit-12
HORVU.MOREX.r2.6HG0450880	HORVU.MOREX.r2.2HG0102030	0.217383	RING finger protein	Signal peptidase subunit-12
HORVU.MOREX.r2.6HG0480840	HORVU.MOREX.r2.2HG0102030	0.189883	Tetraspanin family protein	Signal peptidase subunit-12
HORVU.MOREX.r2.6HG0522170	HORVU.MOREX.r2.2HG0102030	0.598036	transmembrane protein, putative (DUF679)	Signal peptidase subunit-12
HORVU.MOREX.r2.5HG0434210	HORVU.MOREX.r2.2HG0102030	0.286228	Signal peptidase I	Signal peptidase subunit-12
HORVU.MOREX.r2.5HG0428600	HORVU.MOREX.r2.2HG0102030	0.258206	Tetraspanin family protein	Signal peptidase subunit-12
HORVU.MOREX.r2.3HG0189240	HORVU.MOREX.r2.2HG0102030	0.402827	Peptide transporter	Signal peptidase subunit-12
HORVU.MOREX.r2.7HG0604750	HORVU.MOREX.r2.2HG0102030	0.204784	High-affinity nitrate transporter 2.2	Signal peptidase subunit-12
HORVU.MOREX.r2.2HG0129220	HORVU.MOREX.r2.2HG0105150	NA	MADS-box transcription factor	MADS box transcription factor
HORVU.MOREX.r2.3HG0256620	HORVU.MOREX.r2.2HG0105150	0.232058	PISTILLATA-like MADS-box transcription factor	MADS box transcription factor
HORVU.MOREX.r2.5HG0396740	HORVU.MOREX.r2.2HG0105150	0.210608	Vacuolar iron transporter-like protein	MADS box transcription factor
HORVU.MOREX.r2.1HG0019750	HORVU.MOREX.r2.2HG0105150	NA	AGAMOUS MADS box factor transcription factor	MADS box transcription factor
HORVU.MOREX.r2.4HG0290970	HORVU.MOREX.r2.2HG0105150	0.156939	Transcription factor, putative	MADS box transcription factor
HORVU.MOREX.r2.1HG0051900	HORVU.MOREX.r2.2HG0105150	0.337811	PISTILLATA-like MADS-box transcription factor	MADS box transcription factor
HORVU.MOREX.r2.2HG0105150	HORVU.MOREX.r2.2HG0105150	1	MADS box transcription factor	MADS box transcription factor
HORVU.MOREX.r2.5HG0376280	HORVU.MOREX.r2.2HG0105150	0.342395	Transcription factor, putative	MADS box transcription factor
HORVU.MOREX.r2.1HG0006360	HORVU.MOREX.r2.2HG0105150	NA	Agamous MADS-box transcription factor	MADS box transcription factor
HORVU.MOREX.r2.6HG0511230	HORVU.MOREX.r2.2HG0105150	0.203614	MADS box transcription factor	MADS box transcription factor
HORVU.MOREX.r2.3HG0202320	HORVU.MOREX.r2.2HG0105150	0.215478	Agamous MADS-box transcription factor	MADS box transcription factor
HORVU.MOREX.r2.1HG0006350	HORVU.MOREX.r2.2HG0105150	0.201405	Agamous MADS-box transcription factor	MADS box transcription factor
HORVU.MOREX.r2.4HG0324550	HORVU.MOREX.r2.2HG0105150	0.0987645	ethylene-responsive transcription factor	MADS box transcription factor
HORVU.MOREX.r2.5HG0424650	HORVU.MOREX.r2.2HG0105150	0.755005	MADS box transcription factor	MADS box transcription factor
HORVU.MOREX.r2.5HG0349480	HORVU.MOREX.r2.2HG0105150	NA	Agamous MADS-box transcription factor	MADS box transcription factor
HORVU.MOREX.r2.7HG0555610	HORVU.MOREX.r2.2HG0105150	0.131614	Receptor-like protein kinase	MADS box transcription factor
HORVU.MOREX.r2.7HG0598100	HORVU.MOREX.r2.2HG0105150	0.188126	MADS box transcription factor	MADS box transcription factor
HORVU.MOREX.r2.4HG0338120	HORVU.MOREX.r2.2HG0105150	0.154356	MADS box transcription factor	MADS box transcription factor
HORVU.MOREX.r2.7HG0541840	HORVU.MOREX.r2.2HG0105150	NA	Agamous MADS-box transcription factor	MADS box transcription factor
HORVU.MOREX.r2.5HG0349390	HORVU.MOREX.r2.2HG0105150	NA	AGAMOUS MADS box factor transcription factor	MADS box transcription factor
HORVU.MOREX.r2.1HG0024570	HORVU.MOREX.r2.2HG0105150	0.155095	Agamous MADS-box transcription factor	MADS box transcription factor
HORVU.MOREX.r2.2HG0143360	HORVU.MOREX.r2.2HG0105150	0.272705	AGAMOUS-like MADS-box transcription factor	MADS box transcription factor
HORVU.MOREX.r2.7HG0550410	HORVU.MOREX.r2.2HG0105150	0.208842	Ethylene-responsive transcription factor	MADS box transcription factor
HORVU.MOREX.r2.2HG0143540	HORVU.MOREX.r2.2HG0105150	0.159878	Vacuolar iron transporter-like protein	MADS box transcription factor
HORVU.MOREX.r2.2HG0107410	HORVU.MOREX.r2.2HG0110340	0.511612	GRAS transcription factor	Scarecrow transcription factor family protein
HORVU.MOREX.r2.7HG0543420	HORVU.MOREX.r2.2HG0110340	0.169445	MADS box transcription factor	Scarecrow transcription factor family protein
HORVU.MOREX.r2.4HG0282910	HORVU.MOREX.r2.2HG0110340	NA	homeobox-1	Scarecrow transcription factor family protein
HORVU.MOREX.r2.5HG0424690	HORVU.MOREX.r2.2HG0110340	NA	MADS-box transcription factor	Scarecrow transcription factor family protein
HORVU.MOREX.r2.2HG0153110	HORVU.MOREX.r2.2HG0110340	0.157934	Zinc finger, B-box	Scarecrow transcription factor family protein
HORVU.MOREX.r2.4HG0329790	HORVU.MOREX.r2.2HG0110340	NA	MADS box transcription factor	Scarecrow transcription factor family protein
HORVU.MOREX.r2.7HG0598020	HORVU.MOREX.r2.2HG0110340	0.396675	Zinc finger, B-box	Scarecrow transcription factor family protein
HORVU.MOREX.r2.2HG0127090	HORVU.MOREX.r2.2HG0110340	0.1608	Homeobox protein knotted-1-like 1	Scarecrow transcription factor family protein
HORVU.MOREX.r2.7HG0567840	HORVU.MOREX.r2.2HG0110340	0.161105	MADS-box transcription factor	Scarecrow transcription factor family protein
HORVU.MOREX.r2.4HG0278480	HORVU.MOREX.r2.2HG0110340	0.528284	Homeobox protein knotted-1-like 1	Scarecrow transcription factor family protein
HORVU.MOREX.r2.7HG0579160	HORVU.MOREX.r2.2HG0110340	0.510777	Pre-mRNA cleavage complex-related family protein	Scarecrow transcription factor family protein
HORVU.MOREX.r2.4HG0278420	HORVU.MOREX.r2.2HG0110340	NA	Homeobox protein knotted-1-like 1	Scarecrow transcription factor family protein
HORVU.MOREX.r2.5HG0426660	HORVU.MOREX.r2.2HG0110340	NA	Homeobox protein knotted-1-like 1	Scarecrow transcription factor family protein
HORVU.MOREX.r2.2HG0091950	HORVU.MOREX.r2.2HG0110340	0.340076	B3 domain-containing transcription factor VAL3	Scarecrow transcription factor family protein
HORVU.MOREX.r2.4HG0282000	HORVU.MOREX.r2.2HG0110340	0.449078	MYB transcription factor	Scarecrow transcription factor family protein
HORVU.MOREX.r2.5HG0425950	HORVU.MOREX.r2.2HG0110340	NA	basic helix-loop-helix (bHLH) DNA-binding superfamily protein	Scarecrow transcription factor family protein
HORVU.MOREX.r2.5HG0403530	HORVU.MOREX.r2.2HG0110340	0.284454	Patatin	Scarecrow transcription factor family protein
HORVU.MOREX.r2.5HG0409590	HORVU.MOREX.r2.2HG0110340	0.179321	MADS-box transcription factor	Scarecrow transcription factor family protein
HORVU.MOREX.r2.7HG0565000	HORVU.MOREX.r2.2HG0112070	0.264528	Protein kinase	Cyclin
HORVU.MOREX.r2.1HG0051370	HORVU.MOREX.r2.2HG0112070	0.314471	Protein kinase-like protein	Cyclin
HORVU.MOREX.r2.1HG0009310	HORVU.MOREX.r2.2HG0112050	0.553279	DNA repair RAD51-like protein	DNA repair family protein
HORVU.MOREX.r2.3HG0226300	HORVU.MOREX.r2.2HG0118120	0.258465	Amino acid transporter family protein	TVP38/TMEM64 family membrane protein
HORVU.MOREX.r2.1HG0076620	HORVU.MOREX.r2.2HG0118120	0.322119	Amino acid transporter family protein	TVP38/TMEM64 family membrane protein
HORVU.MOREX.r2.3HG0273940	HORVU.MOREX.r2.2HG0118120	0.229802	Rab5-interacting family protein	TVP38/TMEM64 family membrane protein
HORVU.MOREX.r2.3HG0232600	HORVU.MOREX.r2.2HG0118120	0.433355	Glycosylphosphatidylinositol anchor attachment 1 protein	TVP38/TMEM64 family membrane protein
HORVU.MOREX.r2.7HG0530900	HORVU.MOREX.r2.2HG0118120	0.199022	Dolichyl-diphosphooligosaccharide--protein glycosyltransferase subunit DAD1	TVP38/TMEM64 family membrane protein
HORVU.MOREX.r2.5HG0399580	HORVU.MOREX.r2.2HG0118120	0.361928	Early light-induced protein	TVP38/TMEM64 family membrane protein
HORVU.MOREX.r2.5HG0399500	HORVU.MOREX.r2.2HG0118120	0.419951	Early light-induced protein	TVP38/TMEM64 family membrane protein
HORVU.MOREX.r2.UnG0631470	HORVU.MOREX.r2.2HG0118120	0.501185	Early light-induced protein	TVP38/TMEM64 family membrane protein
HORVU.MOREX.r2.1HG0003750	HORVU.MOREX.r2.2HG0118120	0.225999	Rab5-interacting family protein	TVP38/TMEM64 family membrane protein
HORVU.MOREX.r2.5HG0399610	HORVU.MOREX.r2.2HG0118120	0.40807	Early light-induced protein	TVP38/TMEM64 family membrane protein
HORVU.MOREX.r2.4HG0344600	HORVU.MOREX.r2.2HG0118120	0.256275	UDP-galactose transporter	TVP38/TMEM64 family membrane protein
HORVU.MOREX.r2.2HG0083720	HORVU.MOREX.r2.2HG0118120	0.353144	Sugar transporter, putative	TVP38/TMEM64 family membrane protein
HORVU.MOREX.r2.5HG0399450	HORVU.MOREX.r2.2HG0118120	0.371348	Early light-induced protein	TVP38/TMEM64 family membrane protein
HORVU.MOREX.r2.5HG0387690	HORVU.MOREX.r2.2HG0118120	0.473327	PI-PLC X domain-containing protein	TVP38/TMEM64 family membrane protein
HORVU.MOREX.r2.5HG0370810	HORVU.MOREX.r2.2HG0118120	0.347723	Dicarboxylate transporter 2.1, chloroplastic	TVP38/TMEM64 family membrane protein
HORVU.MOREX.r2.7HG0610610	HORVU.MOREX.r2.2HG0118120	0.361935	Dolichyl-diphosphooligosaccharide--protein glycosyltransferase subunit DAD1	TVP38/TMEM64 family membrane protein
HORVU.MOREX.r2.5HG0399590	HORVU.MOREX.r2.2HG0118120	0.357358	Early light-induced protein	TVP38/TMEM64 family membrane protein
HORVU.MOREX.r2.5HG0399570	HORVU.MOREX.r2.2HG0118120	0.47239	Early light-induced protein	TVP38/TMEM64 family membrane protein
HORVU.MOREX.r2.2HG0137960	HORVU.MOREX.r2.2HG0137960	1	U-box domain-containing family protein	U-box domain-containing family protein
HORVU.MOREX.r2.6HG0521380	HORVU.MOREX.r2.2HG0137960	0.864074	U-box domain-containing family protein	U-box domain-containing family protein
HORVU.MOREX.r2.3HG0237390	HORVU.MOREX.r2.2HG0137960	0.33351	Pleiotropic drug resistance ABC transporter	U-box domain-containing family protein
HORVU.MOREX.r2.6HG0521570	HORVU.MOREX.r2.2HG0137960	0.807128	U-box domain-containing family protein	U-box domain-containing family protein
HORVU.MOREX.r2.2HG0177640	HORVU.MOREX.r2.2HG0137960	0.266165	U-box domain-containing family protein	U-box domain-containing family protein
HORVU.MOREX.r2.3HG0250080	HORVU.MOREX.r2.2HG0137960	0.812567	U-box domain-containing family protein	U-box domain-containing family protein
HORVU.MOREX.r2.7HG0595640	HORVU.MOREX.r2.2HG0137960	0.27477	Pleiotropic drug resistance ABC transporter	U-box domain-containing family protein
HORVU.MOREX.r2.1HG0049800	HORVU.MOREX.r2.2HG0134960	NA	Gibberellin receptor GID1a	Glutaredoxin
HORVU.MOREX.r2.5HG0437030	HORVU.MOREX.r2.2HG0134960	NA	Ethylene-responsive transcription factor	Glutaredoxin
HORVU.MOREX.r2.5HG0365730	HORVU.MOREX.r2.2HG0134960	NA	Nuclear pore complex protein NUP93A	Glutaredoxin
HORVU.MOREX.r2.5HG0437010	HORVU.MOREX.r2.2HG0137270	0.929238	30S ribosomal protein S12	30S ribosomal protein S11
HORVU.MOREX.r2.3HG0182650	HORVU.MOREX.r2.2HG0137270	0.945937	50S ribosomal protein L6	30S ribosomal protein S11
HORVU.MOREX.r2.2HG0158350	HORVU.MOREX.r2.2HG0137270	0.983243	30S ribosomal protein S17	30S ribosomal protein S11
HORVU.MOREX.r2.1HG0058860	HORVU.MOREX.r2.2HG0137270	0.982492	30S ribosomal protein S12	30S ribosomal protein S11
HORVU.MOREX.r2.2HG0161120	HORVU.MOREX.r2.2HG0137270	0.974809	Ribosomal protein L11	30S ribosomal protein S11
HORVU.MOREX.r2.5HG0401170	HORVU.MOREX.r2.2HG0137270	0.870918	30S ribosomal protein S12	30S ribosomal protein S11
HORVU.MOREX.r2.2HG0086170	HORVU.MOREX.r2.2HG0137270	0.956707	40S ribosomal protein S6	30S ribosomal protein S11
HORVU.MOREX.r2.5HG0409860	HORVU.MOREX.r2.2HG0137270	0.9755	60S ribosomal protein L7a	30S ribosomal protein S11
HORVU.MOREX.r2.7HG0528960	HORVU.MOREX.r2.2HG0137270	0.968829	50S ribosomal protein L6	30S ribosomal protein S11
HORVU.MOREX.r2.5HG0389330	HORVU.MOREX.r2.2HG0137270	0.98699	40S ribosomal protein S19	30S ribosomal protein S11
HORVU.MOREX.r2.2HG0103970	HORVU.MOREX.r2.2HG0137270	0.856235	30S ribosomal protein S3	30S ribosomal protein S11
HORVU.MOREX.r2.5HG0433840	HORVU.MOREX.r2.2HG0137270	0.984779	60S ribosomal protein L7	30S ribosomal protein S11
HORVU.MOREX.r2.6HG0501850	HORVU.MOREX.r2.2HG0137270	0.481518	AP-2 complex subunit mu	30S ribosomal protein S11
HORVU.MOREX.r2.3HG0182620	HORVU.MOREX.r2.2HG0137270	0.972312	50S ribosomal protein L6	30S ribosomal protein S11
HORVU.MOREX.r2.4HG0331970	HORVU.MOREX.r2.2HG0137270	0.982151	40S ribosomal protein S3a	30S ribosomal protein S11
HORVU.MOREX.r2.3HG0201870	HORVU.MOREX.r2.2HG0137270	0.958948	50S ribosomal protein L5	30S ribosomal protein S11
HORVU.MOREX.r2.1HG0024100	HORVU.MOREX.r2.2HG0137270	0.98496	50S ribosomal protein L5	30S ribosomal protein S11
HORVU.MOREX.r2.2HG0102110	HORVU.MOREX.r2.2HG0137270	0.952383	40S ribosomal protein S6	30S ribosomal protein S11
HORVU.MOREX.r2.7HG0558580	HORVU.MOREX.r2.2HG0137270	NA	50S ribosomal protein L6	30S ribosomal protein S11
HORVU.MOREX.r2.5HG0389360	HORVU.MOREX.r2.2HG0137270	0.975823	50S ribosomal protein L22	30S ribosomal protein S11
HORVU.MOREX.r2.2HG0100920	HORVU.MOREX.r2.2HG0137270	0.946669	30S ribosomal protein S4	30S ribosomal protein S11
HORVU.MOREX.r2.5HG0431510	HORVU.MOREX.r2.2HG0137270	0.940222	60S ribosomal protein L4	30S ribosomal protein S11
HORVU.MOREX.r2.7HG0568170	HORVU.MOREX.r2.2HG0137270	0.978589	60S ribosomal protein L7a	30S ribosomal protein S11
HORVU.MOREX.r2.7HG0584290	HORVU.MOREX.r2.2HG0137270	0.942979	40S ribosomal protein S13	30S ribosomal protein S11
HORVU.MOREX.r2.3HG0239930	HORVU.MOREX.r2.2HG0137270	0.19534	Leucine-rich repeat receptor-like protein kinase family	30S ribosomal protein S11
HORVU.MOREX.r2.2HG0159710	HORVU.MOREX.r2.2HG0137270	0.986281	60S ribosomal protein L7	30S ribosomal protein S11
HORVU.MOREX.r2.5HG0378380	HORVU.MOREX.r2.2HG0137270	0.955149	30S ribosomal protein S4	30S ribosomal protein S11
HORVU.MOREX.r2.7HG0567650	HORVU.MOREX.r2.2HG0137270	0.961072	50S ribosomal protein L22	30S ribosomal protein S11
HORVU.MOREX.r2.7HG0577600	HORVU.MOREX.r2.2HG0137270	0.976353	60S ribosomal protein L13	30S ribosomal protein S11
HORVU.MOREX.r2.3HG0202480	HORVU.MOREX.r2.2HG0137270	0.949914	50S ribosomal protein L24	30S ribosomal protein S11
HORVU.MOREX.r2.3HG0192970	HORVU.MOREX.r2.2HG0137270	0.969325	30S ribosomal protein S7	30S ribosomal protein S11
HORVU.MOREX.r2.6HG0502730	HORVU.MOREX.r2.2HG0137270	0.965816	50S ribosomal protein L11	30S ribosomal protein S11
HORVU.MOREX.r2.7HG0584220	HORVU.MOREX.r2.2HG0137270	0.98116	40S ribosomal protein S13	30S ribosomal protein S11
HORVU.MOREX.r2.7HG0577670	HORVU.MOREX.r2.2HG0137270	0.983944	30S ribosomal protein S3	30S ribosomal protein S11
HORVU.MOREX.r2.6HG0469030	HORVU.MOREX.r2.2HG0137270	0.443242	Polyubiquitin protein	30S ribosomal protein S11
HORVU.MOREX.r2.7HG0608370	HORVU.MOREX.r2.2HG0137270	0.349435	Polyubiquitin	30S ribosomal protein S11
HORVU.MOREX.r2.4HG0314500	HORVU.MOREX.r2.2HG0137270	0.98508	Ribosomal protein L19	30S ribosomal protein S11
HORVU.MOREX.r2.2HG0092790	HORVU.MOREX.r2.2HG0137270	0.967337	60S ribosomal protein L18	30S ribosomal protein S11
HORVU.MOREX.r2.4HG0291480	HORVU.MOREX.r2.2HG0137270	0.970224	Ribosomal protein L3	30S ribosomal protein S11
HORVU.MOREX.r2.4HG0337450	HORVU.MOREX.r2.2HG0137270	0.198076	50S ribosomal protein L2	30S ribosomal protein S11
HORVU.MOREX.r2.2HG0092650	HORVU.MOREX.r2.2HG0137270	0.988613	Ribosomal protein L19	30S ribosomal protein S11
HORVU.MOREX.r2.3HG0253300	HORVU.MOREX.r2.2HG0137270	0.986351	30S ribosomal protein S12	30S ribosomal protein S11
HORVU.MOREX.r2.1HG0018910	HORVU.MOREX.r2.2HG0137270	0.980565	60S ribosomal protein L18-like protein	30S ribosomal protein S11
HORVU.MOREX.r2.5HG0430630	HORVU.MOREX.r2.2HG0137270	0.958256	30S ribosomal protein S13	30S ribosomal protein S11
HORVU.MOREX.r2.6HG0469000	HORVU.MOREX.r2.2HG0137270	0.503345	Polyubiquitin	30S ribosomal protein S11
HORVU.MOREX.r2.6HG0488990	HORVU.MOREX.r2.2HG0137270	0.986593	60S ribosomal protein L6	30S ribosomal protein S11
HORVU.MOREX.r2.5HG0429640	HORVU.MOREX.r2.2HG0137270	0.330884	Syntaxin, putative	30S ribosomal protein S11
HORVU.MOREX.r2.4HG0336330	HORVU.MOREX.r2.2HG0137270	0.963695	60S ribosomal protein L4	30S ribosomal protein S11
HORVU.MOREX.r2.5HG0376740	HORVU.MOREX.r2.2HG0137270	0.966761	Ribosomal protein L3	30S ribosomal protein S11
HORVU.MOREX.r2.1HG0026750	HORVU.MOREX.r2.2HG0137270	0.938063	40S ribosomal protein S3a	30S ribosomal protein S11
HORVU.MOREX.r2.2HG0124730	HORVU.MOREX.r2.2HG0137270	NA	50S ribosomal protein L6	30S ribosomal protein S11
HORVU.MOREX.r2.6HG0454200	HORVU.MOREX.r2.2HG0137270	0.984018	60S ribosomal protein L13	30S ribosomal protein S11
HORVU.MOREX.r2.6HG0492210	HORVU.MOREX.r2.2HG0137270	0.909783	30S ribosomal protein S17	30S ribosomal protein S11
HORVU.MOREX.r2.1HG0018040	HORVU.MOREX.r2.2HG0137270	0.987465	40S ribosomal protein S4	30S ribosomal protein S11
HORVU.MOREX.r2.4HG0319150	HORVU.MOREX.r2.2HG0137270	0.422129	26S protease regulatory subunit	30S ribosomal protein S11
HORVU.MOREX.r2.3HG0197840	HORVU.MOREX.r2.2HG0138950	NA	COP9 signalosome complex subunit 5	40S ribosomal protein S10
HORVU.MOREX.r2.6HG0497980	HORVU.MOREX.r2.2HG0138950	0.798353	Anaphase-promoting complex subunit 8-like protein	40S ribosomal protein S10
HORVU.MOREX.r2.4HG0295930	HORVU.MOREX.r2.2HG0138950	0.366491	Clathrin heavy chain	40S ribosomal protein S10
HORVU.MOREX.r2.5HG0430630	HORVU.MOREX.r2.2HG0138950	0.942093	30S ribosomal protein S13	40S ribosomal protein S10
HORVU.MOREX.r2.2HG0170740	HORVU.MOREX.r2.2HG0138950	0.536296	Short chain dehydrogenase/reductase	40S ribosomal protein S10
HORVU.MOREX.r2.1HG0059160	HORVU.MOREX.r2.2HG0138950	0.974485	30S ribosomal protein S8, putative	40S ribosomal protein S10
HORVU.MOREX.r2.7HG0577670	HORVU.MOREX.r2.2HG0138950	0.971447	30S ribosomal protein S3	40S ribosomal protein S10
HORVU.MOREX.r2.2HG0152290	HORVU.MOREX.r2.2HG0138950	0.235391	Short chain dehydrogenase/reductase	40S ribosomal protein S10
HORVU.MOREX.r2.6HG0492210	HORVU.MOREX.r2.2HG0138950	0.898287	30S ribosomal protein S17	40S ribosomal protein S10
HORVU.MOREX.r2.6HG0484240	HORVU.MOREX.r2.2HG0138950	0.976189	40S ribosomal protein S24	40S ribosomal protein S10
HORVU.MOREX.r2.7HG0616250	HORVU.MOREX.r2.2HG0138950	0.388419	WRKY transcription factor	40S ribosomal protein S10
HORVU.MOREX.r2.1HG0074170	HORVU.MOREX.r2.2HG0138950	0.663793	Short chain dehydrogenase/reductase	40S ribosomal protein S10
HORVU.MOREX.r2.2HG0103970	HORVU.MOREX.r2.2HG0138950	0.839849	30S ribosomal protein S3	40S ribosomal protein S10
HORVU.MOREX.r2.5HG0419620	HORVU.MOREX.r2.2HG0138950	0.398058	Trihelix transcription factor	40S ribosomal protein S10
HORVU.MOREX.r2.5HG0385600	HORVU.MOREX.r2.2HG0138950	0.418076	Clathrin heavy chain	40S ribosomal protein S10
HORVU.MOREX.r2.4HG0319150	HORVU.MOREX.r2.2HG0138950	0.407327	26S protease regulatory subunit	40S ribosomal protein S10
HORVU.MOREX.r2.7HG0595620	HORVU.MOREX.r2.2HG0138950	0.981691	40S ribosomal protein S24	40S ribosomal protein S10
HORVU.MOREX.r2.3HG0237190	HORVU.MOREX.r2.2HG0138950	NA	40S ribosomal protein S24	40S ribosomal protein S10
HORVU.MOREX.r2.6HG0466040	HORVU.MOREX.r2.2HG0138950	NA	COP9 signalosome complex subunit 5	40S ribosomal protein S10
HORVU.MOREX.r2.4HG0294910	HORVU.MOREX.r2.2HG0138950	0.979326	30S ribosomal protein S9	40S ribosomal protein S10
HORVU.MOREX.r2.6HG0471210	HORVU.MOREX.r2.2HG0138950	0.568118	WRKY transcription factor	40S ribosomal protein S10
HORVU.MOREX.r2.2HG0100920	HORVU.MOREX.r2.2HG0138950	0.957402	30S ribosomal protein S4	40S ribosomal protein S10
HORVU.MOREX.r2.5HG0383630	HORVU.MOREX.r2.2HG0138950	0.909854	30S ribosomal protein S9	40S ribosomal protein S10
HORVU.MOREX.r2.4HG0294890	HORVU.MOREX.r2.2HG0138950	0.898778	30S ribosomal protein S9	40S ribosomal protein S10
HORVU.MOREX.r2.3HG0220700	HORVU.MOREX.r2.2HG0138950	0.595511	Glutamate dehydrogenase, putative	40S ribosomal protein S10
HORVU.MOREX.r2.5HG0378380	HORVU.MOREX.r2.2HG0138950	0.951594	30S ribosomal protein S4	40S ribosomal protein S10
HORVU.MOREX.r2.2HG0152320	HORVU.MOREX.r2.2HG0138950	0.717461	Short chain dehydrogenase/reductase	40S ribosomal protein S10
HORVU.MOREX.r2.3HG0252910	HORVU.MOREX.r2.2HG0138950	0.976845	30S ribosomal protein S8, putative	40S ribosomal protein S10
HORVU.MOREX.r2.1HG0026750	HORVU.MOREX.r2.2HG0138950	0.932249	40S ribosomal protein S3a	40S ribosomal protein S10
HORVU.MOREX.r2.7HG0542180	HORVU.MOREX.r2.2HG0138950	0.217695	Short chain dehydrogenase/reductase	40S ribosomal protein S10
HORVU.MOREX.r2.1HG0052500	HORVU.MOREX.r2.2HG0138950	NA	Short-chain dehydrogenase/reductase family protein	40S ribosomal protein S10
HORVU.MOREX.r2.3HG0192970	HORVU.MOREX.r2.2HG0138950	0.966203	30S ribosomal protein S7	40S ribosomal protein S10
HORVU.MOREX.r2.4HG0331970	HORVU.MOREX.r2.2HG0138950	0.983985	40S ribosomal protein S3a	40S ribosomal protein S10
HORVU.MOREX.r2.2HG0152300	HORVU.MOREX.r2.2HG0138950	0.736853	Short-chain dehydrogenase/reductase family protein	40S ribosomal protein S10
HORVU.MOREX.r2.2HG0168870	HORVU.MOREX.r2.2HG0138950	0.781322	COP9 signalosome complex subunit 5	40S ribosomal protein S10
HORVU.MOREX.r2.2HG0158350	HORVU.MOREX.r2.2HG0138950	0.973215	30S ribosomal protein S17	40S ribosomal protein S10
HORVU.MOREX.r2.1HG0018040	HORVU.MOREX.r2.2HG0138950	0.98396	40S ribosomal protein S4	40S ribosomal protein S10
HORVU.MOREX.r2.1HG0004060	HORVU.MOREX.r2.2HG0143170	0.184822	Transducin/WD40 repeat protein	Glyceraldehyde-3-phosphate dehydrogenase
HORVU.MOREX.r2.3HG0232920	HORVU.MOREX.r2.2HG0143170	0.710109	Guanine nucleotide-binding protein beta subunit-like protein	Glyceraldehyde-3-phosphate dehydrogenase
HORVU.MOREX.r2.1HG0069340	HORVU.MOREX.r2.2HG0143170	0.727325	Guanine nucleotide-binding protein subunit beta-1	Glyceraldehyde-3-phosphate dehydrogenase
HORVU.MOREX.r2.3HG0210540	HORVU.MOREX.r2.2HG0143170	0.55232	Syntaxin related protein	Glyceraldehyde-3-phosphate dehydrogenase
HORVU.MOREX.r2.3HG0258670	HORVU.MOREX.r2.2HG0143170	0.505047	Small ubiquitin-related modifier	Glyceraldehyde-3-phosphate dehydrogenase
HORVU.MOREX.r2.6HG0469030	HORVU.MOREX.r2.2HG0143170	0.226027	Polyubiquitin protein	Glyceraldehyde-3-phosphate dehydrogenase
HORVU.MOREX.r2.7HG0608370	HORVU.MOREX.r2.2HG0143170	0.503915	Polyubiquitin	Glyceraldehyde-3-phosphate dehydrogenase
HORVU.MOREX.r2.6HG0469000	HORVU.MOREX.r2.2HG0143170	0.223712	Polyubiquitin	Glyceraldehyde-3-phosphate dehydrogenase
HORVU.MOREX.r2.6HG0501850	HORVU.MOREX.r2.2HG0143170	0.810594	AP-2 complex subunit mu	Glyceraldehyde-3-phosphate dehydrogenase
HORVU.MOREX.r2.3HG0227320	HORVU.MOREX.r2.2HG0143170	0.489399	Transducin/WD40 repeat protein	Glyceraldehyde-3-phosphate dehydrogenase
HORVU.MOREX.r2.5HG0365730	HORVU.MOREX.r2.2HG0143170	0.466138	Nuclear pore complex protein NUP93A	Glyceraldehyde-3-phosphate dehydrogenase
HORVU.MOREX.r2.2HG0143420	HORVU.MOREX.r2.2HG0143770	0.625898	14-3-3 protein	Peroxidase
HORVU.MOREX.r2.7HG0608370	HORVU.MOREX.r2.2HG0143770	0.349406	Polyubiquitin	Peroxidase
HORVU.MOREX.r2.6HG0469000	HORVU.MOREX.r2.2HG0143770	0.517593	Polyubiquitin	Peroxidase
HORVU.MOREX.r2.4HG0311100	HORVU.MOREX.r2.2HG0143770	0.486849	14-3-3 protein	Peroxidase
HORVU.MOREX.r2.4HG0281090	HORVU.MOREX.r2.2HG0143770	0.757857	14-3-3 protein	Peroxidase
HORVU.MOREX.r2.6HG0469030	HORVU.MOREX.r2.2HG0143770	0.339517	Polyubiquitin protein	Peroxidase
HORVU.MOREX.r2.4HG0320920	HORVU.MOREX.r2.2HG0146720	0.27914	Mitogen-activated protein kinase	Kinase family protein
HORVU.MOREX.r2.3HG0249040	HORVU.MOREX.r2.2HG0146720	0.229393	Kinase-like protein	Kinase family protein
HORVU.MOREX.r2.4HG0281980	HORVU.MOREX.r2.2HG0146720	NA	Kinase family protein	Kinase family protein
HORVU.MOREX.r2.1HG0077620	HORVU.MOREX.r2.2HG0146720	NA	Kinase family protein	Kinase family protein
HORVU.MOREX.r2.7HG0541760	HORVU.MOREX.r2.2HG0146720	0.179866	Mitogen-activated protein kinase	Kinase family protein
HORVU.MOREX.r2.5HG0420530	HORVU.MOREX.r2.2HG0148780	NA	SKP1-like protein	F-box protein
HORVU.MOREX.r2.7HG0529030	HORVU.MOREX.r2.2HG0148780	0.47089	SKP1-like protein	F-box protein
HORVU.MOREX.r2.UnG0625960	HORVU.MOREX.r2.2HG0148780	NA	SKP1-like protein	F-box protein
HORVU.MOREX.r2.5HG0435390	HORVU.MOREX.r2.2HG0148780	NA	SKP1-like protein	F-box protein
HORVU.MOREX.r2.UnG0625900	HORVU.MOREX.r2.2HG0148780	NA	SKP1-like protein	F-box protein
HORVU.MOREX.r2.2HG0143420	HORVU.MOREX.r2.2HG0148780	0.344448	14-3-3 protein	F-box protein
HORVU.MOREX.r2.UnG0626300	HORVU.MOREX.r2.2HG0148780	0.283939	SKP1-like protein	F-box protein
HORVU.MOREX.r2.4HG0281090	HORVU.MOREX.r2.2HG0148780	0.541957	14-3-3 protein	F-box protein
HORVU.MOREX.r2.5HG0435350	HORVU.MOREX.r2.2HG0148780	NA	SKP1-like protein	F-box protein
HORVU.MOREX.r2.4HG0311100	HORVU.MOREX.r2.2HG0148780	0.275814	14-3-3 protein	F-box protein
HORVU.MOREX.r2.7HG0605800	HORVU.MOREX.r2.2HG0148780	NA	SKP1-like protein	F-box protein
HORVU.MOREX.r2.7HG0608380	HORVU.MOREX.r2.2HG0148780	NA	SKP1-like protein	F-box protein
HORVU.MOREX.r2.7HG0605830	HORVU.MOREX.r2.2HG0148780	NA	SKP1-like protein	F-box protein
HORVU.MOREX.r2.5HG0435380	HORVU.MOREX.r2.2HG0148780	NA	SKP1-like protein	F-box protein
HORVU.MOREX.r2.7HG0605850	HORVU.MOREX.r2.2HG0148780	NA	SKP1-like protein	F-box protein
HORVU.MOREX.r2.3HG0197840	HORVU.MOREX.r2.2HG0154140	NA	COP9 signalosome complex subunit 5	2-oxoglutarate (2OG) and Fe(II)-dependent oxygenase superfamily protein
HORVU.MOREX.r2.6HG0466040	HORVU.MOREX.r2.2HG0154140	NA	COP9 signalosome complex subunit 5	2-oxoglutarate (2OG) and Fe(II)-dependent oxygenase superfamily protein
HORVU.MOREX.r2.2HG0168870	HORVU.MOREX.r2.2HG0154140	0.485241	COP9 signalosome complex subunit 5	2-oxoglutarate (2OG) and Fe(II)-dependent oxygenase superfamily protein
HORVU.MOREX.r2.6HG0504040	HORVU.MOREX.r2.2HG0155120	0.561676	Protein KINESIN LIGHT CHAIN-RELATED 3	IQ domain-containing protein
HORVU.MOREX.r2.5HG0385050	HORVU.MOREX.r2.2HG0177320	0.573091	Zinc finger HIT domain-containing protein 1	Actin-related protein
HORVU.MOREX.r2.1HG0065860	HORVU.MOREX.r2.2HG0177320	0.272945	SWR1-complex protein 4/DNA methyltransferase 1-associated protein 1	Actin-related protein
HORVU.MOREX.r2.3HG0220590	HORVU.MOREX.r2.2HG0177350	0.260384	Protein transport protein Sec61 beta subunit	Ankyrin repeat domain protein, putative
HORVU.MOREX.r2.5HG0412650	HORVU.MOREX.r2.2HG0177350	0.216511	ATPase ASNA1 homolog	Ankyrin repeat domain protein, putative
HORVU.MOREX.r2.7HG0528960	HORVU.MOREX.r2.7HG0528960	1	50S ribosomal protein L6	50S ribosomal protein L6
HORVU.MOREX.r2.7HG0528960	HORVU.MOREX.r2.3HG0182650	0.966267	50S ribosomal protein L6	50S ribosomal protein L6
HORVU.MOREX.r2.7HG0528960	HORVU.MOREX.r2.3HG0182620	0.982815	50S ribosomal protein L6	50S ribosomal protein L6
HORVU.MOREX.r2.3HG0224180	HORVU.MOREX.r2.7HG0528960	0.222126	Ubiquitin-related family protein	50S ribosomal protein L6
HORVU.MOREX.r2.3HG0224180	HORVU.MOREX.r2.3HG0182650	0.204768	Ubiquitin-related family protein	50S ribosomal protein L6
HORVU.MOREX.r2.3HG0224180	HORVU.MOREX.r2.3HG0182620	0.1759	Ubiquitin-related family protein	50S ribosomal protein L6
HORVU.MOREX.r2.3HG0239930	HORVU.MOREX.r2.7HG0528960	0.205475	Leucine-rich repeat receptor-like protein kinase family	50S ribosomal protein L6
HORVU.MOREX.r2.3HG0239930	HORVU.MOREX.r2.3HG0182650	0.200644	Leucine-rich repeat receptor-like protein kinase family	50S ribosomal protein L6
HORVU.MOREX.r2.3HG0239930	HORVU.MOREX.r2.3HG0182620	0.201089	Leucine-rich repeat receptor-like protein kinase family	50S ribosomal protein L6
HORVU.MOREX.r2.3HG0258670	HORVU.MOREX.r2.7HG0528960	0.325923	Small ubiquitin-related modifier	50S ribosomal protein L6
HORVU.MOREX.r2.3HG0258670	HORVU.MOREX.r2.3HG0182650	0.359908	Small ubiquitin-related modifier	50S ribosomal protein L6
HORVU.MOREX.r2.3HG0258670	HORVU.MOREX.r2.3HG0182620	0.313836	Small ubiquitin-related modifier	50S ribosomal protein L6
HORVU.MOREX.r2.6HG0464080	HORVU.MOREX.r2.7HG0528960	0.331758	26S proteasome non-ATPase regulatory subunit-like protein	50S ribosomal protein L6
HORVU.MOREX.r2.6HG0464080	HORVU.MOREX.r2.3HG0182650	0.394363	26S proteasome non-ATPase regulatory subunit-like protein	50S ribosomal protein L6
HORVU.MOREX.r2.6HG0464080	HORVU.MOREX.r2.3HG0182620	0.32814	26S proteasome non-ATPase regulatory subunit-like protein	50S ribosomal protein L6
HORVU.MOREX.r2.5HG0374940	HORVU.MOREX.r2.7HG0528960	0.16595	E3 ubiquitin-protein ligase	50S ribosomal protein L6
HORVU.MOREX.r2.5HG0374940	HORVU.MOREX.r2.3HG0182650	0.17661	E3 ubiquitin-protein ligase	50S ribosomal protein L6
HORVU.MOREX.r2.5HG0374940	HORVU.MOREX.r2.3HG0182620	0.173633	E3 ubiquitin-protein ligase	50S ribosomal protein L6
HORVU.MOREX.r2.3HG0182620	HORVU.MOREX.r2.3HG0182650	0.96318	50S ribosomal protein L6	50S ribosomal protein L6
HORVU.MOREX.r2.3HG0182620	HORVU.MOREX.r2.3HG0182620	1	50S ribosomal protein L6	50S ribosomal protein L6
HORVU.MOREX.r2.3HG0182650	HORVU.MOREX.r2.3HG0182650	1	50S ribosomal protein L6	50S ribosomal protein L6
HORVU.MOREX.r2.2HG0098990	HORVU.MOREX.r2.7HG0528960	0.873469	Eukaryotic translation initiation factor 6	50S ribosomal protein L6
HORVU.MOREX.r2.2HG0098990	HORVU.MOREX.r2.3HG0182650	0.864015	Eukaryotic translation initiation factor 6	50S ribosomal protein L6
HORVU.MOREX.r2.2HG0098990	HORVU.MOREX.r2.3HG0182620	0.904222	Eukaryotic translation initiation factor 6	50S ribosomal protein L6
HORVU.MOREX.r2.4HG0339250	HORVU.MOREX.r2.7HG0528960	0.890724	Ankyrin repeat domain protein, putative	50S ribosomal protein L6
HORVU.MOREX.r2.4HG0339250	HORVU.MOREX.r2.3HG0182650	0.9118	Ankyrin repeat domain protein, putative	50S ribosomal protein L6
HORVU.MOREX.r2.4HG0339250	HORVU.MOREX.r2.3HG0182620	0.896275	Ankyrin repeat domain protein, putative	50S ribosomal protein L6
HORVU.MOREX.r2.1HG0035670	HORVU.MOREX.r2.7HG0528960	0.894664	Nucleolar complex protein 2	50S ribosomal protein L6
HORVU.MOREX.r2.1HG0035670	HORVU.MOREX.r2.3HG0182650	0.877571	Nucleolar complex protein 2	50S ribosomal protein L6
HORVU.MOREX.r2.1HG0035670	HORVU.MOREX.r2.3HG0182620	0.890934	Nucleolar complex protein 2	50S ribosomal protein L6
HORVU.MOREX.r2.5HG0446800	HORVU.MOREX.r2.7HG0528960	0.247085	Exportin-1	50S ribosomal protein L6
HORVU.MOREX.r2.5HG0446800	HORVU.MOREX.r2.3HG0182650	0.24713	Exportin-1	50S ribosomal protein L6
HORVU.MOREX.r2.5HG0446800	HORVU.MOREX.r2.3HG0182620	0.223683	Exportin-1	50S ribosomal protein L6
HORVU.MOREX.r2.3HG0227320	HORVU.MOREX.r2.7HG0528960	0.343896	Transducin/WD40 repeat protein	50S ribosomal protein L6
HORVU.MOREX.r2.3HG0227320	HORVU.MOREX.r2.3HG0182650	0.344827	Transducin/WD40 repeat protein	50S ribosomal protein L6
HORVU.MOREX.r2.3HG0227320	HORVU.MOREX.r2.3HG0182620	0.336774	Transducin/WD40 repeat protein	50S ribosomal protein L6
HORVU.MOREX.r2.3HG0236190	HORVU.MOREX.r2.7HG0528960	0.72696	KRR1 small subunit processome component	50S ribosomal protein L6
HORVU.MOREX.r2.3HG0236190	HORVU.MOREX.r2.3HG0182650	0.741037	KRR1 small subunit processome component	50S ribosomal protein L6
HORVU.MOREX.r2.3HG0236190	HORVU.MOREX.r2.3HG0182620	0.749134	KRR1 small subunit processome component	50S ribosomal protein L6
HORVU.MOREX.r2.4HG0277690	HORVU.MOREX.r2.7HG0528960	0.608418	TATA-box-binding protein	50S ribosomal protein L6
HORVU.MOREX.r2.4HG0277690	HORVU.MOREX.r2.3HG0182650	0.599438	TATA-box-binding protein	50S ribosomal protein L6
HORVU.MOREX.r2.4HG0277690	HORVU.MOREX.r2.3HG0182620	0.611471	TATA-box-binding protein	50S ribosomal protein L6
HORVU.MOREX.r2.1HG0042520	HORVU.MOREX.r2.7HG0528960	0.641597	E2 ubiquitin-conjugating-like enzyme	50S ribosomal protein L6
HORVU.MOREX.r2.1HG0042520	HORVU.MOREX.r2.3HG0182650	0.651969	E2 ubiquitin-conjugating-like enzyme	50S ribosomal protein L6
HORVU.MOREX.r2.1HG0042520	HORVU.MOREX.r2.3HG0182620	0.667542	E2 ubiquitin-conjugating-like enzyme	50S ribosomal protein L6
HORVU.MOREX.r2.6HG0469000	HORVU.MOREX.r2.7HG0528960	0.548819	Polyubiquitin	50S ribosomal protein L6
HORVU.MOREX.r2.6HG0469000	HORVU.MOREX.r2.3HG0182650	0.452132	Polyubiquitin	50S ribosomal protein L6
HORVU.MOREX.r2.6HG0469000	HORVU.MOREX.r2.3HG0182620	0.53486	Polyubiquitin	50S ribosomal protein L6
HORVU.MOREX.r2.5HG0429640	HORVU.MOREX.r2.7HG0528960	0.35437	Syntaxin, putative	50S ribosomal protein L6
HORVU.MOREX.r2.5HG0429640	HORVU.MOREX.r2.3HG0182650	0.296422	Syntaxin, putative	50S ribosomal protein L6
HORVU.MOREX.r2.5HG0429640	HORVU.MOREX.r2.3HG0182620	0.361648	Syntaxin, putative	50S ribosomal protein L6
HORVU.MOREX.r2.6HG0501850	HORVU.MOREX.r2.7HG0528960	0.468567	AP-2 complex subunit mu	50S ribosomal protein L6
HORVU.MOREX.r2.6HG0501850	HORVU.MOREX.r2.3HG0182650	0.537808	AP-2 complex subunit mu	50S ribosomal protein L6
HORVU.MOREX.r2.6HG0501850	HORVU.MOREX.r2.3HG0182620	0.468024	AP-2 complex subunit mu	50S ribosomal protein L6
HORVU.MOREX.r2.1HG0003480	HORVU.MOREX.r2.7HG0528960	0.764273	Pumilio-like protein	50S ribosomal protein L6
HORVU.MOREX.r2.1HG0003480	HORVU.MOREX.r2.3HG0182650	0.742996	Pumilio-like protein	50S ribosomal protein L6
HORVU.MOREX.r2.1HG0003480	HORVU.MOREX.r2.3HG0182620	0.761073	Pumilio-like protein	50S ribosomal protein L6
HORVU.MOREX.r2.4HG0314300	HORVU.MOREX.r2.7HG0528960	0.911088	Nucleolar GTP-binding protein 2	50S ribosomal protein L6
HORVU.MOREX.r2.4HG0314300	HORVU.MOREX.r2.3HG0182650	0.90171	Nucleolar GTP-binding protein 2	50S ribosomal protein L6
HORVU.MOREX.r2.4HG0314300	HORVU.MOREX.r2.3HG0182620	0.910479	Nucleolar GTP-binding protein 2	50S ribosomal protein L6
HORVU.MOREX.r2.1HG0031760	HORVU.MOREX.r2.7HG0528960	0.95687	60S ribosomal protein L21	50S ribosomal protein L6
HORVU.MOREX.r2.1HG0031760	HORVU.MOREX.r2.3HG0182650	0.951654	60S ribosomal protein L21	50S ribosomal protein L6
HORVU.MOREX.r2.1HG0031760	HORVU.MOREX.r2.3HG0182620	0.973811	60S ribosomal protein L21	50S ribosomal protein L6
HORVU.MOREX.r2.1HG0026750	HORVU.MOREX.r2.7HG0528960	0.901122	40S ribosomal protein S3a	50S ribosomal protein L6
HORVU.MOREX.r2.1HG0026750	HORVU.MOREX.r2.3HG0182650	0.908957	40S ribosomal protein S3a	50S ribosomal protein L6
HORVU.MOREX.r2.1HG0026750	HORVU.MOREX.r2.3HG0182620	0.91414	40S ribosomal protein S3a	50S ribosomal protein L6
HORVU.MOREX.r2.4HG0314500	HORVU.MOREX.r2.7HG0528960	0.955914	Ribosomal protein L19	50S ribosomal protein L6
HORVU.MOREX.r2.4HG0314500	HORVU.MOREX.r2.3HG0182650	0.936182	Ribosomal protein L19	50S ribosomal protein L6
HORVU.MOREX.r2.4HG0314500	HORVU.MOREX.r2.3HG0182620	0.954632	Ribosomal protein L19	50S ribosomal protein L6
HORVU.MOREX.r2.4HG0279770	HORVU.MOREX.r2.7HG0528960	0.543034	Proteasome subunit beta type	50S ribosomal protein L6
HORVU.MOREX.r2.4HG0279770	HORVU.MOREX.r2.3HG0182650	0.616298	Proteasome subunit beta type	50S ribosomal protein L6
HORVU.MOREX.r2.4HG0279770	HORVU.MOREX.r2.3HG0182620	0.574978	Proteasome subunit beta type	50S ribosomal protein L6
HORVU.MOREX.r2.3HG0253280	HORVU.MOREX.r2.7HG0528960	0.75984	zinc finger CCCH domain protein	50S ribosomal protein L6
HORVU.MOREX.r2.3HG0253280	HORVU.MOREX.r2.3HG0182650	0.77412	zinc finger CCCH domain protein	50S ribosomal protein L6
HORVU.MOREX.r2.3HG0253280	HORVU.MOREX.r2.3HG0182620	0.759538	zinc finger CCCH domain protein	50S ribosomal protein L6
HORVU.MOREX.r2.2HG0092650	HORVU.MOREX.r2.7HG0528960	0.96808	Ribosomal protein L19	50S ribosomal protein L6
HORVU.MOREX.r2.2HG0092650	HORVU.MOREX.r2.3HG0182650	0.935185	Ribosomal protein L19	50S ribosomal protein L6
HORVU.MOREX.r2.2HG0092650	HORVU.MOREX.r2.3HG0182620	0.967093	Ribosomal protein L19	50S ribosomal protein L6
HORVU.MOREX.r2.2HG0129270	HORVU.MOREX.r2.7HG0528960	0.969109	50S ribosomal protein L13	50S ribosomal protein L6
HORVU.MOREX.r2.2HG0129270	HORVU.MOREX.r2.3HG0182650	0.959832	50S ribosomal protein L13	50S ribosomal protein L6
HORVU.MOREX.r2.2HG0129270	HORVU.MOREX.r2.3HG0182620	0.981774	50S ribosomal protein L13	50S ribosomal protein L6
HORVU.MOREX.r2.7HG0608370	HORVU.MOREX.r2.7HG0528960	0.349081	Polyubiquitin	50S ribosomal protein L6
HORVU.MOREX.r2.7HG0608370	HORVU.MOREX.r2.3HG0182650	0.348594	Polyubiquitin	50S ribosomal protein L6
HORVU.MOREX.r2.7HG0608370	HORVU.MOREX.r2.3HG0182620	0.319098	Polyubiquitin	50S ribosomal protein L6
HORVU.MOREX.r2.4HG0343460	HORVU.MOREX.r2.7HG0528960	0.967359	60S ribosomal protein L21	50S ribosomal protein L6
HORVU.MOREX.r2.4HG0343460	HORVU.MOREX.r2.3HG0182650	0.946364	60S ribosomal protein L21	50S ribosomal protein L6
HORVU.MOREX.r2.4HG0343460	HORVU.MOREX.r2.3HG0182620	0.980879	60S ribosomal protein L21	50S ribosomal protein L6
HORVU.MOREX.r2.5HG0397940	HORVU.MOREX.r2.7HG0528960	0.928985	Ribosome production factor 2-like protein	50S ribosomal protein L6
HORVU.MOREX.r2.5HG0397940	HORVU.MOREX.r2.3HG0182650	0.923152	Ribosome production factor 2-like protein	50S ribosomal protein L6
HORVU.MOREX.r2.5HG0397940	HORVU.MOREX.r2.3HG0182620	0.929449	Ribosome production factor 2-like protein	50S ribosomal protein L6
HORVU.MOREX.r2.5HG0387320	HORVU.MOREX.r2.7HG0528960	0.232836	DNA-directed RNA polymerase family protein	50S ribosomal protein L6
HORVU.MOREX.r2.5HG0387320	HORVU.MOREX.r2.3HG0182650	0.252358	DNA-directed RNA polymerase family protein	50S ribosomal protein L6
HORVU.MOREX.r2.5HG0387320	HORVU.MOREX.r2.3HG0182620	0.230818	DNA-directed RNA polymerase family protein	50S ribosomal protein L6
HORVU.MOREX.r2.2HG0095700	HORVU.MOREX.r2.7HG0528960	0.808141	Ubiquitin carboxyl-terminal hydrolase	50S ribosomal protein L6
HORVU.MOREX.r2.2HG0095700	HORVU.MOREX.r2.3HG0182650	0.808383	Ubiquitin carboxyl-terminal hydrolase	50S ribosomal protein L6
HORVU.MOREX.r2.2HG0095700	HORVU.MOREX.r2.3HG0182620	0.792845	Ubiquitin carboxyl-terminal hydrolase	50S ribosomal protein L6
HORVU.MOREX.r2.6HG0469030	HORVU.MOREX.r2.7HG0528960	0.514676	Polyubiquitin protein	50S ribosomal protein L6
HORVU.MOREX.r2.6HG0469030	HORVU.MOREX.r2.3HG0182650	0.49954	Polyubiquitin protein	50S ribosomal protein L6
HORVU.MOREX.r2.6HG0469030	HORVU.MOREX.r2.3HG0182620	0.496104	Polyubiquitin protein	50S ribosomal protein L6
HORVU.MOREX.r2.1HG0018510	HORVU.MOREX.r2.7HG0528960	0.136431	RAN guanine nucleotide release factor	50S ribosomal protein L6
HORVU.MOREX.r2.1HG0018510	HORVU.MOREX.r2.3HG0182650	0.171897	RAN guanine nucleotide release factor	50S ribosomal protein L6
HORVU.MOREX.r2.1HG0018510	HORVU.MOREX.r2.3HG0182620	0.137368	RAN guanine nucleotide release factor	50S ribosomal protein L6
HORVU.MOREX.r2.4HG0331970	HORVU.MOREX.r2.7HG0528960	0.980111	40S ribosomal protein S3a	50S ribosomal protein L6
HORVU.MOREX.r2.4HG0331970	HORVU.MOREX.r2.3HG0182650	0.947009	40S ribosomal protein S3a	50S ribosomal protein L6
HORVU.MOREX.r2.4HG0331970	HORVU.MOREX.r2.3HG0182620	0.97455	40S ribosomal protein S3a	50S ribosomal protein L6
HORVU.MOREX.r2.4HG0343670	HORVU.MOREX.r2.7HG0528960	0.51815	E2 ubiquitin-conjugating-like enzyme	50S ribosomal protein L6
HORVU.MOREX.r2.4HG0343670	HORVU.MOREX.r2.3HG0182650	0.484108	E2 ubiquitin-conjugating-like enzyme	50S ribosomal protein L6
HORVU.MOREX.r2.4HG0343670	HORVU.MOREX.r2.3HG0182620	0.508377	E2 ubiquitin-conjugating-like enzyme	50S ribosomal protein L6
HORVU.MOREX.r2.1HG0004060	HORVU.MOREX.r2.7HG0528960	0.504322	Transducin/WD40 repeat protein	50S ribosomal protein L6
HORVU.MOREX.r2.1HG0004060	HORVU.MOREX.r2.3HG0182650	0.420049	Transducin/WD40 repeat protein	50S ribosomal protein L6
HORVU.MOREX.r2.1HG0004060	HORVU.MOREX.r2.3HG0182620	0.501819	Transducin/WD40 repeat protein	50S ribosomal protein L6
HORVU.MOREX.r2.4HG0326700	HORVU.MOREX.r2.7HG0528960	0.377425	26S proteasome non-ATPase regulatory subunit 4	50S ribosomal protein L6
HORVU.MOREX.r2.4HG0326700	HORVU.MOREX.r2.3HG0182650	0.438874	26S proteasome non-ATPase regulatory subunit 4	50S ribosomal protein L6
HORVU.MOREX.r2.4HG0326700	HORVU.MOREX.r2.3HG0182620	0.394242	26S proteasome non-ATPase regulatory subunit 4	50S ribosomal protein L6
HORVU.MOREX.r2.3HG0237800	HORVU.MOREX.r2.3HG0192010	0.481584	Non-specific serine/threonine protein kinase	Stress responsive protein
HORVU.MOREX.r2.5HG0446420	HORVU.MOREX.r2.3HG0192010	0.327727	Sucrose nonfermenting 4-like protein	Stress responsive protein
HORVU.MOREX.r2.4HG0320350	HORVU.MOREX.r2.3HG0192010	0.671768	Non-specific serine/threonine protein kinase	Stress responsive protein
HORVU.MOREX.r2.3HG0226490	HORVU.MOREX.r2.3HG0192010	0.585616	Calcium-dependent protein kinase	Stress responsive protein
HORVU.MOREX.r2.3HG0267720	HORVU.MOREX.r2.3HG0192010	0.221463	Non-specific serine/threonine protein kinase	Stress responsive protein
HORVU.MOREX.r2.3HG0267730	HORVU.MOREX.r2.3HG0192010	NA	Non-specific serine/threonine protein kinase	Stress responsive protein
HORVU.MOREX.r2.1HG0067230	HORVU.MOREX.r2.3HG0192010	0.293895	Non-specific serine/threonine protein kinase	Stress responsive protein
HORVU.MOREX.r2.1HG0076500	HORVU.MOREX.r2.3HG0192010	0.615327	Calcium-dependent protein kinase	Stress responsive protein
HORVU.MOREX.r2.3HG0204770	HORVU.MOREX.r2.3HG0192010	0.239855	Non-specific serine/threonine protein kinase	Stress responsive protein
HORVU.MOREX.r2.4HG0314380	HORVU.MOREX.r2.3HG0200670	0.551352	Uroporphyrinogen decarboxylase	Peroxidase
HORVU.MOREX.r2.6HG0524000	HORVU.MOREX.r2.3HG0209300	0.231173	Histone H2A	Histone H2B
HORVU.MOREX.r2.6HG0479380	HORVU.MOREX.r2.3HG0209300	0.488624	Histone deacetylase	Histone H2B
HORVU.MOREX.r2.7HG0615100	HORVU.MOREX.r2.3HG0209300	0.310527	Histone H2A	Histone H2B
HORVU.MOREX.r2.5HG0393410	HORVU.MOREX.r2.3HG0209300	0.254322	Protein arginine methyltransferase	Histone H2B
HORVU.MOREX.r2.1HG0027750	HORVU.MOREX.r2.3HG0209300	0.329982	Histone acetyltransferase GCN5	Histone H2B
HORVU.MOREX.r2.1HG0069340	HORVU.MOREX.r2.3HG0209300	0.147886	Guanine nucleotide-binding protein subunit beta-1	Histone H2B
HORVU.MOREX.r2.3HG0232920	HORVU.MOREX.r2.3HG0209300	0.192387	Guanine nucleotide-binding protein beta subunit-like protein	Histone H2B
HORVU.MOREX.r2.7HG0615090	HORVU.MOREX.r2.3HG0209300	0.295642	Histone H2A	Histone H2B
HORVU.MOREX.r2.6HG0521660	HORVU.MOREX.r2.3HG0209300	0.299044	Transcriptional corepressor LEUNIG	Histone H2B
HORVU.MOREX.r2.2HG0148230	HORVU.MOREX.r2.3HG0215170	0.548645	Trafficking protein particle complex subunit 9	Exocyst complex component SEC15B
HORVU.MOREX.r2.5HG0368080	HORVU.MOREX.r2.3HG0215170	0.530405	Trafficking protein particle complex subunit 10	Exocyst complex component SEC15B
HORVU.MOREX.r2.3HG0223560	HORVU.MOREX.r2.3HG0215210	0.685644	Pentatricopeptide repeat-containing protein	WD40 repeat-containing protein
HORVU.MOREX.r2.5HG0446060	HORVU.MOREX.r2.3HG0215210	0.847925	Polyribonucleotide nucleotidyltransferase	WD40 repeat-containing protein
HORVU.MOREX.r2.6HG0469320	HORVU.MOREX.r2.3HG0215210	0.252684	Exosome complex component rrp4	WD40 repeat-containing protein
HORVU.MOREX.r2.1HG0055530	HORVU.MOREX.r2.3HG0215210	0.156119	Transcription elongation factor SPT6	WD40 repeat-containing protein
HORVU.MOREX.r2.4HG0296910	HORVU.MOREX.r2.3HG0215210	0.388772	Protein Red	WD40 repeat-containing protein
HORVU.MOREX.r2.1HG0071030	HORVU.MOREX.r2.3HG0215210	0.913234	Ribonuclease PH	WD40 repeat-containing protein
HORVU.MOREX.r2.5HG0419110	HORVU.MOREX.r2.3HG0215210	0.837387	Exosome complex component CSL4	WD40 repeat-containing protein
HORVU.MOREX.r2.7HG0552920	HORVU.MOREX.r2.3HG0215210	0.892902	Exosome complex component rrp4	WD40 repeat-containing protein
HORVU.MOREX.r2.4HG0285380	HORVU.MOREX.r2.3HG0215210	0.840834	Exosome complex component	WD40 repeat-containing protein
HORVU.MOREX.r2.1HG0066810	HORVU.MOREX.r2.3HG0215210	0.693065	Pentatricopeptide repeat-containing protein	WD40 repeat-containing protein
HORVU.MOREX.r2.7HG0581760	HORVU.MOREX.r2.3HG0215210	0.826501	Exosome complex component	WD40 repeat-containing protein
HORVU.MOREX.r2.6HG0518390	HORVU.MOREX.r2.3HG0215210	0.703235	DNA helicase	WD40 repeat-containing protein
HORVU.MOREX.r2.4HG0283640	HORVU.MOREX.r2.3HG0234350	0.274585	GRF1-interacting factor-like protein	Myb transcription factor
HORVU.MOREX.r2.2HG0175470	HORVU.MOREX.r2.3HG0234350	0.522795	Response regulator	Myb transcription factor
HORVU.MOREX.r2.7HG0535320	HORVU.MOREX.r2.3HG0234350	0.15833	NAC domain-containing protein, putative	Myb transcription factor
HORVU.MOREX.r2.7HG0584520	HORVU.MOREX.r2.3HG0234350	0.121942	NAC domain-containing protein, putative	Myb transcription factor
HORVU.MOREX.r2.3HG0241150	HORVU.MOREX.r2.3HG0234350	NA	Homeobox leucine zipper protein	Myb transcription factor
HORVU.MOREX.r2.3HG0222280	HORVU.MOREX.r2.3HG0234350	0.463388	V-type proton ATPase subunit d	Myb transcription factor
HORVU.MOREX.r2.2HG0151180	HORVU.MOREX.r2.3HG0234350	NA	Response regulator	Myb transcription factor
HORVU.MOREX.r2.4HG0278420	HORVU.MOREX.r2.3HG0234350	NA	Homeobox protein knotted-1-like 1	Myb transcription factor
HORVU.MOREX.r2.6HG0453310	HORVU.MOREX.r2.3HG0234350	NA	Kinase family protein	Myb transcription factor
HORVU.MOREX.r2.3HG0234350	HORVU.MOREX.r2.3HG0234350	1	Myb transcription factor	Myb transcription factor
HORVU.MOREX.r2.7HG0535330	HORVU.MOREX.r2.3HG0234350	0.169312	NAC domain-containing protein	Myb transcription factor
HORVU.MOREX.r2.4HG0282910	HORVU.MOREX.r2.3HG0234350	NA	homeobox-1	Myb transcription factor
HORVU.MOREX.r2.1HG0041620	HORVU.MOREX.r2.3HG0234350	0.299725	Basic helix loop helix (BHLH) family transcription factor	Myb transcription factor
HORVU.MOREX.r2.2HG0127090	HORVU.MOREX.r2.3HG0234350	0.20122	Homeobox protein knotted-1-like 1	Myb transcription factor
HORVU.MOREX.r2.3HG0201840	HORVU.MOREX.r2.3HG0234350	0.290959	Kinase family protein	Myb transcription factor
HORVU.MOREX.r2.1HG0016740	HORVU.MOREX.r2.3HG0234350	NA	Transcription factor basic helix-loop-helix	Myb transcription factor
HORVU.MOREX.r2.5HG0426660	HORVU.MOREX.r2.3HG0234350	NA	Homeobox protein knotted-1-like 1	Myb transcription factor
HORVU.MOREX.r2.4HG0278480	HORVU.MOREX.r2.3HG0234350	0.19421	Homeobox protein knotted-1-like 1	Myb transcription factor
HORVU.MOREX.r2.4HG0325410	HORVU.MOREX.r2.3HG0245400	0.468123	Topless-related protein 1	Ethylene-responsive factor-like transcription factor
HORVU.MOREX.r2.6HG0469000	HORVU.MOREX.r2.3HG0270820	0.452884	Polyubiquitin	Progesterone 5-beta-reductase
HORVU.MOREX.r2.6HG0469030	HORVU.MOREX.r2.3HG0270820	0.310707	Polyubiquitin protein	Progesterone 5-beta-reductase
HORVU.MOREX.r2.7HG0608370	HORVU.MOREX.r2.3HG0270820	0.314387	Polyubiquitin	Progesterone 5-beta-reductase
HORVU.MOREX.r2.6HG0469030	HORVU.MOREX.r2.3HG0270850	0.265542	Polyubiquitin protein	UDP-glycosyltransferase
HORVU.MOREX.r2.7HG0608370	HORVU.MOREX.r2.3HG0270850	0.391868	Polyubiquitin	UDP-glycosyltransferase
HORVU.MOREX.r2.6HG0469000	HORVU.MOREX.r2.3HG0270850	0.363128	Polyubiquitin	UDP-glycosyltransferase
HORVU.MOREX.r2.6HG0455170	HORVU.MOREX.r2.3HG0271670	0.173	RNA-binding KH domain protein	KH domain-containing protein
HORVU.MOREX.r2.4HG0280470	HORVU.MOREX.r2.4HG0280470	1	Zinc finger family protein	Zinc finger family protein
HORVU.MOREX.r2.1HG0021470	HORVU.MOREX.r2.4HG0280470	0.354003	RING/U-box superfamily protein	Zinc finger family protein
HORVU.MOREX.r2.4HG0340050	HORVU.MOREX.r2.4HG0280470	0.309846	Ethylene-responsive transcription factor	Zinc finger family protein
HORVU.MOREX.r2.5HG0392210	HORVU.MOREX.r2.4HG0280470	0.184859	RING/U-box superfamily protein	Zinc finger family protein
HORVU.MOREX.r2.3HG0195970	HORVU.MOREX.r2.4HG0280470	0.254278	Transcription factor, putative	Zinc finger family protein
HORVU.MOREX.r2.2HG0129270	HORVU.MOREX.r2.4HG0280470	0.903435	50S ribosomal protein L13	Zinc finger family protein
HORVU.MOREX.r2.3HG0233480	HORVU.MOREX.r2.4HG0280470	0.373553	RING/U-box superfamily protein	Zinc finger family protein
HORVU.MOREX.r2.3HG0209880	HORVU.MOREX.r2.4HG0280470	0.340466	Nuclear pore complex protein	Zinc finger family protein
HORVU.MOREX.r2.3HG0198850	HORVU.MOREX.r2.4HG0280470	0.18959	RING/U-box superfamily protein	Zinc finger family protein
HORVU.MOREX.r2.5HG0421920	HORVU.MOREX.r2.4HG0280470	0.724613	Large subunit GTPase 1	Zinc finger family protein
HORVU.MOREX.r2.4HG0314300	HORVU.MOREX.r2.4HG0280470	0.848459	Nucleolar GTP-binding protein 2	Zinc finger family protein
HORVU.MOREX.r2.6HG0516170	HORVU.MOREX.r2.4HG0280470	0.249591	RING/U-box superfamily protein	Zinc finger family protein
HORVU.MOREX.r2.5HG0401370	HORVU.MOREX.r2.7HG0591690	0.272911	Chloroplast lysine N-methyltransferase	Two-component response regulator-like protein
HORVU.MOREX.r2.1HG0074950	HORVU.MOREX.r2.7HG0591690	NA	Zinc finger CCCH domain protein	Two-component response regulator-like protein
HORVU.MOREX.r2.6HG0510040	HORVU.MOREX.r2.7HG0591690	0.298082	TCP transcription factor	Two-component response regulator-like protein
HORVU.MOREX.r2.7HG0609970	HORVU.MOREX.r2.7HG0591690	0.388099	Zinc finger CCCH domain-containing protein 45	Two-component response regulator-like protein
HORVU.MOREX.r2.2HG0143320	HORVU.MOREX.r2.7HG0591690	0.200741	NAC domain protein	Two-component response regulator-like protein
HORVU.MOREX.r2.5HG0402060	HORVU.MOREX.r2.7HG0591690	0.399459	RING finger protein	Two-component response regulator-like protein
HORVU.MOREX.r2.7HG0602620	HORVU.MOREX.r2.7HG0591690	0.194289	Histone acetyltransferase	Two-component response regulator-like protein
HORVU.MOREX.r2.5HG0424650	HORVU.MOREX.r2.7HG0591690	0.330284	MADS box transcription factor	Two-component response regulator-like protein
HORVU.MOREX.r2.7HG0552760	HORVU.MOREX.r2.7HG0591690	0.191559	TCP transcription factor	Two-component response regulator-like protein
HORVU.MOREX.r2.7HG0529470	HORVU.MOREX.r2.7HG0591690	0.448878	RING finger protein	Two-component response regulator-like protein
HORVU.MOREX.r2.2HG0105150	HORVU.MOREX.r2.7HG0591690	0.284607	MADS box transcription factor	Two-component response regulator-like protein
HORVU.MOREX.r2.1HG0074290	HORVU.MOREX.r2.7HG0591690	0.320593	G-box binding factor	Two-component response regulator-like protein
HORVU.MOREX.r2.4HG0335780	HORVU.MOREX.r2.7HG0591690	0.51894	Dof zinc finger protein	Two-component response regulator-like protein
HORVU.MOREX.r2.3HG0232180	HORVU.MOREX.r2.7HG0591690	0.615497	Evolutionarily conserved C-terminal region 2	Two-component response regulator-like protein
HORVU.MOREX.r2.1HG0055140	HORVU.MOREX.r2.7HG0591690	NA	Ethylene-responsive transcription factor, putative	Two-component response regulator-like protein
HORVU.MOREX.r2.7HG0529530	HORVU.MOREX.r2.7HG0591690	0.261549	RING finger family protein	Two-component response regulator-like protein
HORVU.MOREX.r2.6HG0452230	HORVU.MOREX.r2.7HG0591690	0.264901	ATP-dependent helicase family protein	Two-component response regulator-like protein
HORVU.MOREX.r2.6HG0462270	HORVU.MOREX.r2.7HG0591690	0.323091	Histone acetyltransferase	Two-component response regulator-like protein
HORVU.MOREX.r2.2HG0129220	HORVU.MOREX.r2.7HG0591690	NA	MADS-box transcription factor	Two-component response regulator-like protein
HORVU.MOREX.r2.1HG0027750	HORVU.MOREX.r2.4HG0303300	0.2153	Histone acetyltransferase GCN5	ATP-dependent RNA helicase, putative
HORVU.MOREX.r2.3HG0258670	HORVU.MOREX.r2.4HG0303300	0.319539	Small ubiquitin-related modifier	ATP-dependent RNA helicase, putative
HORVU.MOREX.r2.1HG0049040	HORVU.MOREX.r2.4HG0304310	0.44661	AMP deaminase	WD-repeat protein, putative
HORVU.MOREX.r2.2HG0088790	HORVU.MOREX.r2.4HG0304310	0.392239	AMP deaminase	WD-repeat protein, putative
HORVU.MOREX.r2.6HG0521570	HORVU.MOREX.r2.4HG0304230	0.421556	U-box domain-containing family protein	ABC transporter ATP-binding protein
HORVU.MOREX.r2.3HG0250080	HORVU.MOREX.r2.4HG0304230	0.417285	U-box domain-containing family protein	ABC transporter ATP-binding protein
HORVU.MOREX.r2.6HG0521380	HORVU.MOREX.r2.4HG0304230	0.41592	U-box domain-containing family protein	ABC transporter ATP-binding protein
HORVU.MOREX.r2.2HG0137960	HORVU.MOREX.r2.4HG0304230	0.441909	U-box domain-containing family protein	ABC transporter ATP-binding protein
HORVU.MOREX.r2.5HG0399730	HORVU.MOREX.r2.4HG0325470	0.267281	Eukaryotic translation initiation factor 3 subunit C	Type I inositol-1,4,5-trisphosphate 5-phosphatase
HORVU.MOREX.r2.4HG0283930	HORVU.MOREX.r2.4HG0325470	0.219314	Eukaryotic translation initiation factor 3 subunit G	Type I inositol-1,4,5-trisphosphate 5-phosphatase
HORVU.MOREX.r2.5HG0426690	HORVU.MOREX.r2.4HG0325470	0.43923	Eukaryotic translation initiation factor 3 subunit C	Type I inositol-1,4,5-trisphosphate 5-phosphatase
HORVU.MOREX.r2.6HG0516470	HORVU.MOREX.r2.4HG0325470	0.149858	Eukaryotic translation initiation factor 3 subunit G	Type I inositol-1,4,5-trisphosphate 5-phosphatase
HORVU.MOREX.r2.5HG0406360	HORVU.MOREX.r2.4HG0325470	0.273796	Eukaryotic translation initiation factor 3 subunit E	Type I inositol-1,4,5-trisphosphate 5-phosphatase
HORVU.MOREX.r2.5HG0376280	HORVU.MOREX.r2.4HG0325420	0.286528	Transcription factor, putative	Patatin
HORVU.MOREX.r2.4HG0290970	HORVU.MOREX.r2.4HG0325420	0.410752	Transcription factor, putative	Patatin
HORVU.MOREX.r2.6HG0469030	HORVU.MOREX.r2.4HG0325410	0.241049	Polyubiquitin protein	Topless-related protein 1
HORVU.MOREX.r2.4HG0325410	HORVU.MOREX.r2.4HG0325410	1	Topless-related protein 1	Topless-related protein 1
HORVU.MOREX.r2.7HG0608370	HORVU.MOREX.r2.4HG0325410	0.366774	Polyubiquitin	Topless-related protein 1
HORVU.MOREX.r2.2HG0108340	HORVU.MOREX.r2.4HG0325410	0.210567	BES1/BZR1 homolog 1	Topless-related protein 1
HORVU.MOREX.r2.6HG0479380	HORVU.MOREX.r2.4HG0325410	0.201067	Histone deacetylase	Topless-related protein 1
HORVU.MOREX.r2.1HG0071020	HORVU.MOREX.r2.4HG0325410	0.170789	Ninja-family protein	Topless-related protein 1
HORVU.MOREX.r2.3HG0251360	HORVU.MOREX.r2.4HG0325410	NA	Wuschel-related homeobox protein	Topless-related protein 1
HORVU.MOREX.r2.5HG0406220	HORVU.MOREX.r2.4HG0325410	0.262536	Heat shock protein 90	Topless-related protein 1
HORVU.MOREX.r2.5HG0413940	HORVU.MOREX.r2.4HG0325410	0.595328	Pseudo response regulator	Topless-related protein 1
HORVU.MOREX.r2.6HG0469000	HORVU.MOREX.r2.4HG0325410	0.211616	Polyubiquitin	Topless-related protein 1
HORVU.MOREX.r2.2HG0095700	HORVU.MOREX.r2.4HG0325400	0.352412	Ubiquitin carboxyl-terminal hydrolase	Chorismate synthase
HORVU.MOREX.r2.5HG0387320	HORVU.MOREX.r2.4HG0325400	0.546018	DNA-directed RNA polymerase family protein	Chorismate synthase
HORVU.MOREX.r2.1HG0003480	HORVU.MOREX.r2.4HG0325400	0.317781	Pumilio-like protein	Chorismate synthase
HORVU.MOREX.r2.5HG0374940	HORVU.MOREX.r2.4HG0325400	0.131451	E3 ubiquitin-protein ligase	Chorismate synthase
HORVU.MOREX.r2.1HG0018510	HORVU.MOREX.r2.4HG0325400	0.260995	RAN guanine nucleotide release factor	Chorismate synthase
HORVU.MOREX.r2.6HG0521730	HORVU.MOREX.r2.4HG0325400	0.31638	Glutathione reductase	Chorismate synthase
HORVU.MOREX.r2.4HG0335030	HORVU.MOREX.r2.4HG0325400	0.716328	Glutathione reductase	Chorismate synthase
HORVU.MOREX.r2.3HG0206450	HORVU.MOREX.r2.4HG0328360	0.226246	Glyoxylate reductase/hydroxypyruvate reductase	Branched-chain-amino-acid aminotransferase
HORVU.MOREX.r2.3HG0252080	HORVU.MOREX.r2.4HG0328360	0.196464	Protein phosphatase 2C	Branched-chain-amino-acid aminotransferase
HORVU.MOREX.r2.6HG0461070	HORVU.MOREX.r2.4HG0328360	0.520989	Succinate dehydrogenase [ubiquinone] flavoprotein subunit, mitochondrial	Branched-chain-amino-acid aminotransferase
HORVU.MOREX.r2.4HG0323620	HORVU.MOREX.r2.4HG0328360	0.191209	Protein phosphatase 2C	Branched-chain-amino-acid aminotransferase
HORVU.MOREX.r2.4HG0296290	HORVU.MOREX.r2.5HG0352100	0.345956	Protein transport protein Sec61 subunit beta, putative	Fatty acid 2-hydroxylase
HORVU.MOREX.r2.2HG0155270	HORVU.MOREX.r2.5HG0352100	0.623015	ORMDL family protein-like	Fatty acid 2-hydroxylase
HORVU.MOREX.r2.2HG0100640	HORVU.MOREX.r2.5HG0352100	0.291479	Transmembrane emp24 domain-containing protein	Fatty acid 2-hydroxylase
HORVU.MOREX.r2.4HG0317680	HORVU.MOREX.r2.5HG0354360	0.526881	Phytochrome	1-deoxy-D-xylulose 5-phosphate synthase 1
HORVU.MOREX.r2.4HG0319410	HORVU.MOREX.r2.5HG0354360	0.598188	Eukaryotic translation initiation factor 2 subunit alpha	1-deoxy-D-xylulose 5-phosphate synthase 1
HORVU.MOREX.r2.2HG0089200	HORVU.MOREX.r2.5HG0354360	0.258049	Eukaryotic translation initiation factor 2 subunit alpha	1-deoxy-D-xylulose 5-phosphate synthase 1
HORVU.MOREX.r2.2HG0079570	HORVU.MOREX.r2.5HG0354360	0.421373	Pyruvate dehydrogenase E1 component subunit alpha	1-deoxy-D-xylulose 5-phosphate synthase 1
HORVU.MOREX.r2.1HG0077910	HORVU.MOREX.r2.5HG0354360	0.240548	DNA damage-binding protein 1	1-deoxy-D-xylulose 5-phosphate synthase 1
HORVU.MOREX.r2.3HG0222430	HORVU.MOREX.r2.5HG0354360	0.675987	DNA damage-binding protein 1	1-deoxy-D-xylulose 5-phosphate synthase 1
HORVU.MOREX.r2.6HG0521400	HORVU.MOREX.r2.5HG0355760	0.457334	Bidirectional sugar transporter SWEET	Bidirectional sugar transporter SWEET
HORVU.MOREX.r2.6HG0471860	HORVU.MOREX.r2.5HG0355760	0.489514	Bidirectional sugar transporter SWEET	Bidirectional sugar transporter SWEET
HORVU.MOREX.r2.1HG0007880	HORVU.MOREX.r2.5HG0355760	0.491383	Bidirectional sugar transporter SWEET	Bidirectional sugar transporter SWEET
HORVU.MOREX.r2.5HG0355760	HORVU.MOREX.r2.5HG0355760	1	Bidirectional sugar transporter SWEET	Bidirectional sugar transporter SWEET
HORVU.MOREX.r2.6HG0491780	HORVU.MOREX.r2.5HG0355760	0.815476	Bidirectional sugar transporter SWEET	Bidirectional sugar transporter SWEET
HORVU.MOREX.r2.7HG0546820	HORVU.MOREX.r2.5HG0355760	0.647374	Bidirectional sugar transporter SWEET	Bidirectional sugar transporter SWEET
HORVU.MOREX.r2.1HG0025160	HORVU.MOREX.r2.5HG0355760	0.464683	Bidirectional sugar transporter SWEET	Bidirectional sugar transporter SWEET
HORVU.MOREX.r2.5HG0409930	HORVU.MOREX.r2.5HG0355760	NA	Bidirectional sugar transporter SWEET	Bidirectional sugar transporter SWEET
HORVU.MOREX.r2.6HG0449520	HORVU.MOREX.r2.5HG0355760	0.431273	Bidirectional sugar transporter SWEET	Bidirectional sugar transporter SWEET
HORVU.MOREX.r2.6HG0521560	HORVU.MOREX.r2.5HG0355760	0.620236	Bidirectional sugar transporter SWEET	Bidirectional sugar transporter SWEET
HORVU.MOREX.r2.3HG0191170	HORVU.MOREX.r2.5HG0355760	NA	Bidirectional sugar transporter SWEET	Bidirectional sugar transporter SWEET
HORVU.MOREX.r2.7HG0568330	HORVU.MOREX.r2.5HG0355760	NA	Bidirectional sugar transporter SWEET	Bidirectional sugar transporter SWEET
HORVU.MOREX.r2.1HG0003070	HORVU.MOREX.r2.5HG0383160	0.837112	50S ribosomal protein L22	Ephrin type-B receptor 3
HORVU.MOREX.r2.3HG0209490	HORVU.MOREX.r2.5HG0383160	0.848281	50S ribosomal protein L3, putative	Ephrin type-B receptor 3
HORVU.MOREX.r2.3HG0245120	HORVU.MOREX.r2.5HG0383160	0.854704	Pentatricopeptide repeat-containing protein	Ephrin type-B receptor 3
HORVU.MOREX.r2.2HG0096310	HORVU.MOREX.r2.5HG0383160	0.822511	30S ribosomal protein S9	Ephrin type-B receptor 3
HORVU.MOREX.r2.1HG0034150	HORVU.MOREX.r2.5HG0383160	0.839696	28S ribosomal protein S29, mitochondrial	Ephrin type-B receptor 3
HORVU.MOREX.r2.3HG0232100	HORVU.MOREX.r2.5HG0383160	0.860433	50S ribosomal protein L15, putative, expressed	Ephrin type-B receptor 3
HORVU.MOREX.r2.6HG0519490	HORVU.MOREX.r2.5HG0383160	0.892959	30S ribosomal protein S15	Ephrin type-B receptor 3
HORVU.MOREX.r2.7HG0558250	HORVU.MOREX.r2.5HG0383170	0.165948	Aquaporin	Peroxisomal membrane MPV17/PMP22-like protein
HORVU.MOREX.r2.6HG0526770	HORVU.MOREX.r2.5HG0383170	0.349334	Syntaxin	Peroxisomal membrane MPV17/PMP22-like protein
HORVU.MOREX.r2.7HG0623060	HORVU.MOREX.r2.5HG0383170	0.322784	Aquaporin	Peroxisomal membrane MPV17/PMP22-like protein
HORVU.MOREX.r2.3HG0202540	HORVU.MOREX.r2.5HG0383170	0.451762	Nuclear pore complex protein NUP35	Peroxisomal membrane MPV17/PMP22-like protein
HORVU.MOREX.r2.3HG0239310	HORVU.MOREX.r2.5HG0383170	0.167299	Nuclear pore complex protein NUP35	Peroxisomal membrane MPV17/PMP22-like protein
HORVU.MOREX.r2.5HG0369800	HORVU.MOREX.r2.5HG0383170	0.35449	Syntaxin	Peroxisomal membrane MPV17/PMP22-like protein
HORVU.MOREX.r2.2HG0123500	HORVU.MOREX.r2.5HG0383170	0.22644	Syntaxin	Peroxisomal membrane MPV17/PMP22-like protein
HORVU.MOREX.r2.1HG0062380	HORVU.MOREX.r2.5HG0383170	0.280306	Nuclear pore complex protein NUP35	Peroxisomal membrane MPV17/PMP22-like protein
HORVU.MOREX.r2.6HG0469030	HORVU.MOREX.r2.3HG0214830	0.207428	Polyubiquitin protein	Ribosomal protein S4
HORVU.MOREX.r2.7HG0608370	HORVU.MOREX.r2.3HG0214830	0.152649	Polyubiquitin	Ribosomal protein S4
HORVU.MOREX.r2.6HG0469000	HORVU.MOREX.r2.3HG0214830	0.197938	Polyubiquitin	Ribosomal protein S4
HORVU.MOREX.r2.3HG0197100	HORVU.MOREX.r2.5HG0363250	0.903572	Glutamine--tRNA ligase	Methionine--tRNA ligase
HORVU.MOREX.r2.6HG0469030	HORVU.MOREX.r2.5HG0363250	0.521135	Polyubiquitin protein	Methionine--tRNA ligase
HORVU.MOREX.r2.7HG0581610	HORVU.MOREX.r2.5HG0363250	0.781038	Tyrosine--tRNA ligase	Methionine--tRNA ligase
HORVU.MOREX.r2.3HG0266680	HORVU.MOREX.r2.5HG0363250	0.392209	Crossover junction endonuclease mus81	Methionine--tRNA ligase
HORVU.MOREX.r2.5HG0414960	HORVU.MOREX.r2.5HG0363250	0.27567	Aspartate--tRNA ligase	Methionine--tRNA ligase
HORVU.MOREX.r2.3HG0190470	HORVU.MOREX.r2.5HG0363250	0.899103	Threonine--tRNA ligase	Methionine--tRNA ligase
HORVU.MOREX.r2.3HG0208150	HORVU.MOREX.r2.5HG0363250	0.897687	Leucine--tRNA ligase	Methionine--tRNA ligase
HORVU.MOREX.r2.4HG0279680	HORVU.MOREX.r2.5HG0363250	0.388448	Lysine--tRNA ligase	Methionine--tRNA ligase
HORVU.MOREX.r2.6HG0465700	HORVU.MOREX.r2.5HG0363250	0.20051	Aspartate--tRNA ligase	Methionine--tRNA ligase
HORVU.MOREX.r2.5HG0363250	HORVU.MOREX.r2.5HG0363250	1	Methionine--tRNA ligase	Methionine--tRNA ligase
HORVU.MOREX.r2.1HG0000700	HORVU.MOREX.r2.5HG0363250	0.596479	Transcription initiation factor TFIID subunit 6	Methionine--tRNA ligase
HORVU.MOREX.r2.7HG0608370	HORVU.MOREX.r2.5HG0363250	0.318787	Polyubiquitin	Methionine--tRNA ligase
HORVU.MOREX.r2.6HG0469000	HORVU.MOREX.r2.5HG0363250	0.425482	Polyubiquitin	Methionine--tRNA ligase
HORVU.MOREX.r2.4HG0301490	HORVU.MOREX.r2.5HG0363250	0.640794	14-3-3-like protein	Methionine--tRNA ligase
HORVU.MOREX.r2.5HG0374940	HORVU.MOREX.r2.5HG0363250	0.173566	E3 ubiquitin-protein ligase	Methionine--tRNA ligase
HORVU.MOREX.r2.3HG0258190	HORVU.MOREX.r2.5HG0363250	0.79512	Proline--tRNA ligase	Methionine--tRNA ligase
HORVU.MOREX.r2.2HG0099480	HORVU.MOREX.r2.5HG0363250	0.87146	Leucine--tRNA ligase	Methionine--tRNA ligase
HORVU.MOREX.r2.1HG0047420	HORVU.MOREX.r2.5HG0363250	0.160136	Threonine--tRNA ligase	Methionine--tRNA ligase
HORVU.MOREX.r2.5HG0387260	HORVU.MOREX.r2.5HG0363250	0.904922	Aspartate--tRNA ligase	Methionine--tRNA ligase
HORVU.MOREX.r2.5HG0432020	HORVU.MOREX.r2.5HG0363250	0.873908	Lysine--tRNA ligase	Methionine--tRNA ligase
HORVU.MOREX.r2.7HG0555280	HORVU.MOREX.r2.5HG0363250	0.520903	Proline--tRNA ligase	Methionine--tRNA ligase
HORVU.MOREX.r2.7HG0611040	HORVU.MOREX.r2.5HG0363250	NA	Aspartate--tRNA ligase	Methionine--tRNA ligase
HORVU.MOREX.r2.1HG0055660	HORVU.MOREX.r2.5HG0371450	0.433811	Nucleotide-sugar transporter family protein	Peroxisomal membrane 22 kDa (Mpv17/PMP22) family protein
HORVU.MOREX.r2.3HG0245810	HORVU.MOREX.r2.5HG0371450	0.358376	Sugar phosphate/phosphate translocator	Peroxisomal membrane 22 kDa (Mpv17/PMP22) family protein
HORVU.MOREX.r2.3HG0215820	HORVU.MOREX.r2.5HG0371450	0.631422	Lipase family protein	Peroxisomal membrane 22 kDa (Mpv17/PMP22) family protein
HORVU.MOREX.r2.3HG0206170	HORVU.MOREX.r2.5HG0371450	0.624774	Reticulon-like protein	Peroxisomal membrane 22 kDa (Mpv17/PMP22) family protein
HORVU.MOREX.r2.5HG0382160	HORVU.MOREX.r2.5HG0371450	NA	Nucleotide/sugar transporter family protein	Peroxisomal membrane 22 kDa (Mpv17/PMP22) family protein
HORVU.MOREX.r2.4HG0338680	HORVU.MOREX.r2.5HG0371450	0.57606	1,4-dihydroxy-2-naphthoate polyprenyltransferase, chloroplastic	Peroxisomal membrane 22 kDa (Mpv17/PMP22) family protein
HORVU.MOREX.r2.4HG0334150	HORVU.MOREX.r2.5HG0388170	0.18254	Phosphoserine aminotransferase	Dehydrogenase/reductase SDR family member 2
HORVU.MOREX.r2.2HG0132890	HORVU.MOREX.r2.5HG0388170	0.589464	3-oxoacyl-reductase	Dehydrogenase/reductase SDR family member 2
HORVU.MOREX.r2.3HG0195910	HORVU.MOREX.r2.5HG0388170	0.2092	Translation machinery-associated protein 22	Dehydrogenase/reductase SDR family member 2
HORVU.MOREX.r2.1HG0049150	HORVU.MOREX.r2.5HG0388170	0.518552	Methionine aminopeptidase 2	Dehydrogenase/reductase SDR family member 2
HORVU.MOREX.r2.7HG0595850	HORVU.MOREX.r2.5HG0388170	0.221649	SWIM zinc finger family protein / mitogen-activated protein kinase kinase kinase-related, putative	Dehydrogenase/reductase SDR family member 2
HORVU.MOREX.r2.5HG0403200	HORVU.MOREX.r2.5HG0388170	0.603327	Zinc-binding dehydrogenase family protein	Dehydrogenase/reductase SDR family member 2
HORVU.MOREX.r2.1HG0051370	HORVU.MOREX.r2.5HG0388190	0.317511	Protein kinase-like protein	Plastid-lipid-associated protein
HORVU.MOREX.r2.4HG0331120	HORVU.MOREX.r2.5HG0388190	NA	Cyclin	Plastid-lipid-associated protein
HORVU.MOREX.r2.4HG0344580	HORVU.MOREX.r2.5HG0388190	0.299336	Protein kinase	Plastid-lipid-associated protein
HORVU.MOREX.r2.3HG0182440	HORVU.MOREX.r2.5HG0388190	0.244585	Peptidyl-prolyl cis-trans isomerase	Plastid-lipid-associated protein
HORVU.MOREX.r2.6HG0510040	HORVU.MOREX.r2.5HG0388190	0.168459	TCP transcription factor	Plastid-lipid-associated protein
HORVU.MOREX.r2.2HG0163370	HORVU.MOREX.r2.5HG0388190	0.619827	Chaperone protein DNAj, putative	Plastid-lipid-associated protein
HORVU.MOREX.r2.4HG0285910	HORVU.MOREX.r2.5HG0388190	NA	Cyclin	Plastid-lipid-associated protein
HORVU.MOREX.r2.5HG0363660	HORVU.MOREX.r2.5HG0388190	0.291039	Cyclin	Plastid-lipid-associated protein
HORVU.MOREX.r2.1HG0066860	HORVU.MOREX.r2.5HG0388190	0.388907	Starch synthase	Plastid-lipid-associated protein
HORVU.MOREX.r2.6HG0457700	HORVU.MOREX.r2.5HG0388190	0.743924	Protein kinase	Plastid-lipid-associated protein
HORVU.MOREX.r2.5HG0377810	HORVU.MOREX.r2.5HG0388190	0.271895	Receptor-like protein kinase	Plastid-lipid-associated protein
HORVU.MOREX.r2.5HG0425450	HORVU.MOREX.r2.5HG0388190	0.188925	Mitotic checkpoint protein BUB3	Plastid-lipid-associated protein
HORVU.MOREX.r2.2HG0114820	HORVU.MOREX.r2.5HG0388190	0.207262	Isocitrate lyase	Plastid-lipid-associated protein
HORVU.MOREX.r2.4HG0335560	HORVU.MOREX.r2.5HG0388190	0.305004	plant/protein	Plastid-lipid-associated protein
HORVU.MOREX.r2.4HG0311970	HORVU.MOREX.r2.5HG0388190	0.502801	E3 ubiquitin-protein ligase	Plastid-lipid-associated protein
HORVU.MOREX.r2.3HG0209860	HORVU.MOREX.r2.5HG0388190	0.53931	Importin subunit alpha	Plastid-lipid-associated protein
HORVU.MOREX.r2.7HG0552760	HORVU.MOREX.r2.5HG0388190	0.204645	TCP transcription factor	Plastid-lipid-associated protein
HORVU.MOREX.r2.5HG0388190	HORVU.MOREX.r2.5HG0388190	1	Plastid-lipid-associated protein	Plastid-lipid-associated protein
HORVU.MOREX.r2.7HG0595640	HORVU.MOREX.r2.5HG0386030	0.189919	Pleiotropic drug resistance ABC transporter	Phosphoinositide phospholipase C
HORVU.MOREX.r2.3HG0237390	HORVU.MOREX.r2.5HG0386030	0.730484	Pleiotropic drug resistance ABC transporter	Phosphoinositide phospholipase C
HORVU.MOREX.r2.3HG0258670	HORVU.MOREX.r2.5HG0386030	0.122265	Small ubiquitin-related modifier	Phosphoinositide phospholipase C
HORVU.MOREX.r2.5HG0402780	HORVU.MOREX.r2.5HG0389580	0.741094	UPF0396 protein	BTB/POZ domain-containing protein
HORVU.MOREX.r2.6HG0469000	HORVU.MOREX.r2.5HG0396910	0.275052	Polyubiquitin	Alcohol dehydrogenase, putative
HORVU.MOREX.r2.7HG0608370	HORVU.MOREX.r2.5HG0396910	0.446811	Polyubiquitin	Alcohol dehydrogenase, putative
HORVU.MOREX.r2.6HG0469030	HORVU.MOREX.r2.5HG0396910	0.21809	Polyubiquitin protein	Alcohol dehydrogenase, putative
HORVU.MOREX.r2.6HG0477020	HORVU.MOREX.r2.5HG0399620	0.183072	Mediator of RNA polymerase II transcription subunit 11	Nef-associated protein 1
HORVU.MOREX.r2.7HG0612140	HORVU.MOREX.r2.5HG0399620	0.530895	Mediator of RNA polymerase II transcription subunit 11	Nef-associated protein 1
HORVU.MOREX.r2.5HG0412650	HORVU.MOREX.r2.5HG0399620	0.213738	ATPase ASNA1 homolog	Nef-associated protein 1
HORVU.MOREX.r2.6HG0469000	HORVU.MOREX.r2.5HG0409710	0.700685	Polyubiquitin	Nuclear transport factor 2
HORVU.MOREX.r2.4HG0326080	HORVU.MOREX.r2.5HG0409710	0.657081	ATP-dependent Clp protease ATP-binding subunit	Nuclear transport factor 2
HORVU.MOREX.r2.7HG0608370	HORVU.MOREX.r2.5HG0409710	0.19499	Polyubiquitin	Nuclear transport factor 2
HORVU.MOREX.r2.6HG0469030	HORVU.MOREX.r2.5HG0409710	0.534691	Polyubiquitin protein	Nuclear transport factor 2
HORVU.MOREX.r2.2HG0097010	HORVU.MOREX.r2.5HG0412480	NA	BTB-POZ and MATH domain protein	Ethylene-responsive transcription factor
HORVU.MOREX.r2.2HG0146290	HORVU.MOREX.r2.5HG0412480	NA	Trihelix transcription factor GT-1	Ethylene-responsive transcription factor
HORVU.MOREX.r2.4HG0289970	HORVU.MOREX.r2.5HG0412480	NA	SWI/SNF complex subunit SWI3C	Ethylene-responsive transcription factor
HORVU.MOREX.r2.5HG0377070	HORVU.MOREX.r2.5HG0412480	NA	SWI/SNF complex subunit SWI3C	Ethylene-responsive transcription factor
HORVU.MOREX.r2.6HG0519800	HORVU.MOREX.r2.5HG0427220	0.260838	Aldehyde dehydrogenase	Succinate dehydrogenase [ubiquinone] flavoprotein subunit, mitochondrial
HORVU.MOREX.r2.2HG0143620	HORVU.MOREX.r2.5HG0427220	0.273047	Aldehyde dehydrogenase	Succinate dehydrogenase [ubiquinone] flavoprotein subunit, mitochondrial
HORVU.MOREX.r2.4HG0311100	HORVU.MOREX.r2.5HG0427220	0.611829	14-3-3 protein	Succinate dehydrogenase [ubiquinone] flavoprotein subunit, mitochondrial
HORVU.MOREX.r2.2HG0143420	HORVU.MOREX.r2.5HG0427220	0.744962	14-3-3 protein	Succinate dehydrogenase [ubiquinone] flavoprotein subunit, mitochondrial
HORVU.MOREX.r2.4HG0281090	HORVU.MOREX.r2.5HG0427220	0.841402	14-3-3 protein	Succinate dehydrogenase [ubiquinone] flavoprotein subunit, mitochondrial
HORVU.MOREX.r2.7HG0583800	HORVU.MOREX.r2.5HG0427220	0.677745	Succinate dehydrogenase [ubiquinone] iron-sulfur subunit, mitochondrial	Succinate dehydrogenase [ubiquinone] flavoprotein subunit, mitochondrial
HORVU.MOREX.r2.5HG0394680	HORVU.MOREX.r2.5HG0427220	NA	Succinate dehydrogenase [ubiquinone] iron-sulfur subunit, mitochondrial	Succinate dehydrogenase [ubiquinone] flavoprotein subunit, mitochondrial
HORVU.MOREX.r2.3HG0232920	HORVU.MOREX.r2.5HG0429370	0.532248	Guanine nucleotide-binding protein beta subunit-like protein	Peroxisomal (S)-2-hydroxy-acid oxidase
HORVU.MOREX.r2.1HG0004060	HORVU.MOREX.r2.5HG0429370	0.20682	Transducin/WD40 repeat protein	Peroxisomal (S)-2-hydroxy-acid oxidase
HORVU.MOREX.r2.7HG0608370	HORVU.MOREX.r2.5HG0429370	0.566509	Polyubiquitin	Peroxisomal (S)-2-hydroxy-acid oxidase
HORVU.MOREX.r2.6HG0469000	HORVU.MOREX.r2.5HG0429370	0.363185	Polyubiquitin	Peroxisomal (S)-2-hydroxy-acid oxidase
HORVU.MOREX.r2.2HG0108340	HORVU.MOREX.r2.5HG0429370	0.220277	BES1/BZR1 homolog 1	Peroxisomal (S)-2-hydroxy-acid oxidase
HORVU.MOREX.r2.6HG0469030	HORVU.MOREX.r2.5HG0429370	0.236781	Polyubiquitin protein	Peroxisomal (S)-2-hydroxy-acid oxidase
HORVU.MOREX.r2.3HG0227320	HORVU.MOREX.r2.5HG0429370	0.595782	Transducin/WD40 repeat protein	Peroxisomal (S)-2-hydroxy-acid oxidase
HORVU.MOREX.r2.1HG0069340	HORVU.MOREX.r2.5HG0429370	0.589286	Guanine nucleotide-binding protein subunit beta-1	Peroxisomal (S)-2-hydroxy-acid oxidase
HORVU.MOREX.r2.7HG0563540	HORVU.MOREX.r2.5HG0429370	0.95752	Alanine:glyoxylate aminotransferase	Peroxisomal (S)-2-hydroxy-acid oxidase
HORVU.MOREX.r2.7HG0561670	HORVU.MOREX.r2.5HG0429370	0.34894	Protein kinase	Peroxisomal (S)-2-hydroxy-acid oxidase
HORVU.MOREX.r2.6HG0469030	HORVU.MOREX.r2.5HG0437080	0.334091	Polyubiquitin protein	Leukotriene a-4 hydrolase aminopeptidase
HORVU.MOREX.r2.6HG0469000	HORVU.MOREX.r2.5HG0437080	0.221998	Polyubiquitin	Leukotriene a-4 hydrolase aminopeptidase
HORVU.MOREX.r2.7HG0608370	HORVU.MOREX.r2.5HG0437080	0.333227	Polyubiquitin	Leukotriene a-4 hydrolase aminopeptidase
HORVU.MOREX.r2.7HG0558250	HORVU.MOREX.r2.6HG0467940	0.107481	Aquaporin	glucuronoxylan 4-O-methyltransferase-like protein (DUF579)
HORVU.MOREX.r2.7HG0623060	HORVU.MOREX.r2.6HG0467940	0.133046	Aquaporin	glucuronoxylan 4-O-methyltransferase-like protein (DUF579)
HORVU.MOREX.r2.4HG0349080	HORVU.MOREX.r2.6HG0468640	0.436863	Calcineurin B-like protein	Non-specific serine/threonine protein kinase
HORVU.MOREX.r2.6HG0468640	HORVU.MOREX.r2.6HG0468640	1	Non-specific serine/threonine protein kinase	Non-specific serine/threonine protein kinase
HORVU.MOREX.r2.1HG0057520	HORVU.MOREX.r2.6HG0468640	0.229808	Non-specific serine/threonine protein kinase	Non-specific serine/threonine protein kinase
HORVU.MOREX.r2.4HG0293910	HORVU.MOREX.r2.6HG0468640	0.167179	Non-specific serine/threonine protein kinase	Non-specific serine/threonine protein kinase
HORVU.MOREX.r2.3HG0248140	HORVU.MOREX.r2.6HG0468640	0.226594	Non-specific serine/threonine protein kinase	Non-specific serine/threonine protein kinase
HORVU.MOREX.r2.2HG0092290	HORVU.MOREX.r2.6HG0468640	0.635181	Non-specific serine/threonine protein kinase	Non-specific serine/threonine protein kinase
HORVU.MOREX.r2.1HG0045430	HORVU.MOREX.r2.6HG0468640	0.257143	Calcineurin B-like protein	Non-specific serine/threonine protein kinase
HORVU.MOREX.r2.3HG0232920	HORVU.MOREX.r2.6HG0468640	0.434613	Guanine nucleotide-binding protein beta subunit-like protein	Non-specific serine/threonine protein kinase
HORVU.MOREX.r2.1HG0069340	HORVU.MOREX.r2.6HG0468640	0.32858	Guanine nucleotide-binding protein subunit beta-1	Non-specific serine/threonine protein kinase
HORVU.MOREX.r2.1HG0049050	HORVU.MOREX.r2.6HG0467880	0.495966	Ran-binding protein 1 domain-containing	EH domain-containing protein 1
HORVU.MOREX.r2.3HG0210540	HORVU.MOREX.r2.6HG0467880	0.405015	Syntaxin related protein	EH domain-containing protein 1
HORVU.MOREX.r2.7HG0607290	HORVU.MOREX.r2.6HG0467880	0.159187	Ran-binding protein 1 domain-containing	EH domain-containing protein 1
HORVU.MOREX.r2.3HG0258670	HORVU.MOREX.r2.6HG0467880	0.290028	Small ubiquitin-related modifier	EH domain-containing protein 1
HORVU.MOREX.r2.5HG0373900	HORVU.MOREX.r2.6HG0467880	0.182397	Calcium-dependent protein kinase	EH domain-containing protein 1
HORVU.MOREX.r2.5HG0405240	HORVU.MOREX.r2.6HG0473200	0.159001	Receptor protein kinase, putative	Receptor protein kinase, putative
HORVU.MOREX.r2.2HG0161320	HORVU.MOREX.r2.6HG0473200	0.114866	Receptor-like kinase	Receptor protein kinase, putative
HORVU.MOREX.r2.3HG0194360	HORVU.MOREX.r2.6HG0473200	0.184104	Receptor protein kinase, putative	Receptor protein kinase, putative
HORVU.MOREX.r2.7HG0536230	HORVU.MOREX.r2.6HG0473200	0.181636	Receptor-like protein kinase	Receptor protein kinase, putative
HORVU.MOREX.r2.6HG0466040	HORVU.MOREX.r2.6HG0473200	NA	COP9 signalosome complex subunit 5	Receptor protein kinase, putative
HORVU.MOREX.r2.4HG0285250	HORVU.MOREX.r2.6HG0473200	0.11214	Receptor-like kinase	Receptor protein kinase, putative
HORVU.MOREX.r2.6HG0450230	HORVU.MOREX.r2.6HG0473200	0.215963	Nitrate reductase	Receptor protein kinase, putative
HORVU.MOREX.r2.2HG0168870	HORVU.MOREX.r2.6HG0473200	0.120836	COP9 signalosome complex subunit 5	Receptor protein kinase, putative
HORVU.MOREX.r2.3HG0248400	HORVU.MOREX.r2.6HG0473200	0.1676	Leucine-rich repeat receptor-like protein kinase	Receptor protein kinase, putative
HORVU.MOREX.r2.7HG0604110	HORVU.MOREX.r2.6HG0473200	0.165117	Receptor-like kinase	Receptor protein kinase, putative
HORVU.MOREX.r2.1HG0078580	HORVU.MOREX.r2.6HG0473200	0.175069	Non-specific serine/threonine protein kinase	Receptor protein kinase, putative
HORVU.MOREX.r2.2HG0106100	HORVU.MOREX.r2.6HG0473200	0.15448	Receptor kinase	Receptor protein kinase, putative
HORVU.MOREX.r2.7HG0562040	HORVU.MOREX.r2.6HG0473200	0.127519	Receptor protein kinase, putative	Receptor protein kinase, putative
HORVU.MOREX.r2.3HG0197840	HORVU.MOREX.r2.6HG0473200	NA	COP9 signalosome complex subunit 5	Receptor protein kinase, putative
HORVU.MOREX.r2.5HG0349900	HORVU.MOREX.r2.6HG0473200	0.161383	Receptor-like protein kinase	Receptor protein kinase, putative
HORVU.MOREX.r2.4HG0287810	HORVU.MOREX.r2.6HG0473200	0.269981	Receptor protein kinase, putative	Receptor protein kinase, putative
HORVU.MOREX.r2.6HG0469030	HORVU.MOREX.r2.6HG0471070	0.262848	Polyubiquitin protein	Proteasome subunit beta type
HORVU.MOREX.r2.5HG0374940	HORVU.MOREX.r2.6HG0471070	0.413036	E3 ubiquitin-protein ligase	Proteasome subunit beta type
HORVU.MOREX.r2.1HG0023540	HORVU.MOREX.r2.6HG0471070	0.617791	Proteasome subunit beta type	Proteasome subunit beta type
HORVU.MOREX.r2.3HG0237260	HORVU.MOREX.r2.6HG0471070	0.737395	Proteasome subunit alpha type	Proteasome subunit beta type
HORVU.MOREX.r2.6HG0515910	HORVU.MOREX.r2.6HG0471070	0.545197	26S protease regulatory subunit	Proteasome subunit beta type
HORVU.MOREX.r2.7HG0537870	HORVU.MOREX.r2.6HG0471070	0.659464	Proteasome subunit beta type	Proteasome subunit beta type
HORVU.MOREX.r2.4HG0326700	HORVU.MOREX.r2.6HG0471070	0.677194	26S proteasome non-ATPase regulatory subunit 4	Proteasome subunit beta type
HORVU.MOREX.r2.5HG0409440	HORVU.MOREX.r2.6HG0471070	0.694096	Proteasome subunit beta type	Proteasome subunit beta type
HORVU.MOREX.r2.1HG0074920	HORVU.MOREX.r2.6HG0471070	0.653065	Proteasome subunit beta type	Proteasome subunit beta type
HORVU.MOREX.r2.7HG0570790	HORVU.MOREX.r2.6HG0471070	0.727756	Proteasome subunit alpha type	Proteasome subunit beta type
HORVU.MOREX.r2.5HG0415950	HORVU.MOREX.r2.6HG0471070	0.434952	26S proteasome regulatory subunit	Proteasome subunit beta type
HORVU.MOREX.r2.4HG0337290	HORVU.MOREX.r2.6HG0471070	0.739343	Proteasome subunit alpha type	Proteasome subunit beta type
HORVU.MOREX.r2.6HG0478760	HORVU.MOREX.r2.6HG0471070	0.469876	26S protease regulatory subunit, putative	Proteasome subunit beta type
HORVU.MOREX.r2.7HG0544550	HORVU.MOREX.r2.6HG0471070	0.630928	Proteasome subunit alpha type	Proteasome subunit beta type
HORVU.MOREX.r2.4HG0279770	HORVU.MOREX.r2.6HG0471070	0.813032	Proteasome subunit beta type	Proteasome subunit beta type
HORVU.MOREX.r2.1HG0056110	HORVU.MOREX.r2.6HG0471070	0.733284	Proteasome subunit alpha type	Proteasome subunit beta type
HORVU.MOREX.r2.3HG0229390	HORVU.MOREX.r2.6HG0471070	0.598353	Myosin heavy chain-like	Proteasome subunit beta type
HORVU.MOREX.r2.4HG0319150	HORVU.MOREX.r2.6HG0471070	0.393817	26S protease regulatory subunit	Proteasome subunit beta type
HORVU.MOREX.r2.5HG0411360	HORVU.MOREX.r2.6HG0471070	0.643889	Proteasome subunit beta type	Proteasome subunit beta type
HORVU.MOREX.r2.2HG0088730	HORVU.MOREX.r2.6HG0471070	0.544198	26S protease regulatory subunit	Proteasome subunit beta type
HORVU.MOREX.r2.6HG0469000	HORVU.MOREX.r2.6HG0471070	0.21509	Polyubiquitin	Proteasome subunit beta type
HORVU.MOREX.r2.4HG0332910	HORVU.MOREX.r2.6HG0471070	0.464444	26S proteasome regulatory subunit	Proteasome subunit beta type
HORVU.MOREX.r2.5HG0415180	HORVU.MOREX.r2.6HG0471070	0.793589	Proteasome subunit alpha type	Proteasome subunit beta type
HORVU.MOREX.r2.6HG0464080	HORVU.MOREX.r2.6HG0471070	0.480755	26S proteasome non-ATPase regulatory subunit-like protein	Proteasome subunit beta type
HORVU.MOREX.r2.7HG0541070	HORVU.MOREX.r2.6HG0471070	0.566834	Proteasome subunit beta type	Proteasome subunit beta type
HORVU.MOREX.r2.5HG0444970	HORVU.MOREX.r2.6HG0471070	0.564879	26S proteasome non-ATPase regulatory subunit	Proteasome subunit beta type
HORVU.MOREX.r2.2HG0108030	HORVU.MOREX.r2.6HG0471070	0.771157	Proteasome subunit alpha type	Proteasome subunit beta type
HORVU.MOREX.r2.7HG0608370	HORVU.MOREX.r2.6HG0471070	0.417403	Polyubiquitin	Proteasome subunit beta type
HORVU.MOREX.r2.4HG0308660	HORVU.MOREX.r2.6HG0471070	0.684606	Proteasome subunit alpha type	Proteasome subunit beta type
HORVU.MOREX.r2.2HG0158670	HORVU.MOREX.r2.6HG0471070	0.255634	26S proteasome non-atpase regulatory subunit, putative	Proteasome subunit beta type
HORVU.MOREX.r2.7HG0592250	HORVU.MOREX.r2.6HG0471070	0.514867	26S protease regulatory subunit, putative	Proteasome subunit beta type
HORVU.MOREX.r2.5HG0434930	HORVU.MOREX.r2.6HG0471070	0.798059	Proteasome subunit beta type	Proteasome subunit beta type
HORVU.MOREX.r2.5HG0423670	HORVU.MOREX.r2.6HG0471060	0.317948	Kinase-like protein	Kinase family protein
HORVU.MOREX.r2.7HG0608370	HORVU.MOREX.r2.6HG0483590	0.23061	Polyubiquitin	Apoptosis inhibitor 5
HORVU.MOREX.r2.6HG0520300	HORVU.MOREX.r2.6HG0483590	0.40705	AP-1 complex subunit gamma-2	Apoptosis inhibitor 5
HORVU.MOREX.r2.7HG0544420	HORVU.MOREX.r2.6HG0483590	0.210112	AP-1 complex subunit gamma-2	Apoptosis inhibitor 5
HORVU.MOREX.r2.6HG0469030	HORVU.MOREX.r2.6HG0483590	0.386384	Polyubiquitin protein	Apoptosis inhibitor 5
HORVU.MOREX.r2.6HG0469000	HORVU.MOREX.r2.6HG0483590	0.525234	Polyubiquitin	Apoptosis inhibitor 5
HORVU.MOREX.r2.5HG0434100	HORVU.MOREX.r2.6HG0491140	0.210076	Squalene synthase	Ergosterol biosynthetic protein 28
HORVU.MOREX.r2.6HG0491140	HORVU.MOREX.r2.6HG0491140	1	Ergosterol biosynthetic protein 28	Ergosterol biosynthetic protein 28
HORVU.MOREX.r2.4HG0328370	HORVU.MOREX.r2.6HG0491140	0.388605	Squalene monooxygenase	Ergosterol biosynthetic protein 28
HORVU.MOREX.r2.6HG0463020	HORVU.MOREX.r2.6HG0491140	0.341353	Terpene cyclase/mutase family member	Ergosterol biosynthetic protein 28
HORVU.MOREX.r2.1HG0043590	HORVU.MOREX.r2.6HG0491140	0.2422	Methylsterol monooxygenase 1-2	Ergosterol biosynthetic protein 28
HORVU.MOREX.r2.3HG0226300	HORVU.MOREX.r2.6HG0493980	0.490424	Amino acid transporter family protein	Long-chain-alcohol oxidase
HORVU.MOREX.r2.7HG0593030	HORVU.MOREX.r2.6HG0493980	0.619375	UDP-galactose transporter, putative	Long-chain-alcohol oxidase
HORVU.MOREX.r2.6HG0489200	HORVU.MOREX.r2.6HG0493980	0.662498	Alkaline phosphatase D	Long-chain-alcohol oxidase
HORVU.MOREX.r2.3HG0234870	HORVU.MOREX.r2.6HG0493980	0.403793	RING/U-box superfamily protein	Long-chain-alcohol oxidase
HORVU.MOREX.r2.1HG0066850	HORVU.MOREX.r2.6HG0493980	0.607916	Glycerophosphodiester phosphodiesterase	Long-chain-alcohol oxidase
HORVU.MOREX.r2.4HG0320870	HORVU.MOREX.r2.6HG0493980	0.587053	Triose-phosphate transporter family protein	Long-chain-alcohol oxidase
HORVU.MOREX.r2.1HG0076620	HORVU.MOREX.r2.6HG0493980	0.290441	Amino acid transporter family protein	Long-chain-alcohol oxidase
HORVU.MOREX.r2.3HG0206170	HORVU.MOREX.r2.6HG0493980	0.656489	Reticulon-like protein	Long-chain-alcohol oxidase
HORVU.MOREX.r2.4HG0290140	HORVU.MOREX.r2.6HG0492290	0.696338	MLO-like protein	Leucine-rich repeat (LRR) family protein
HORVU.MOREX.r2.1HG0044160	HORVU.MOREX.r2.6HG0482600	0.251293	Scarecrow transcription factor family protein	Protein kinase family protein
HORVU.MOREX.r2.4HG0346290	HORVU.MOREX.r2.6HG0482600	0.185223	Scarecrow transcription factor family protein	Protein kinase family protein
HORVU.MOREX.r2.5HG0368990	HORVU.MOREX.r2.6HG0482600	0.274713	Acyl-CoA-binding domain-containing protein 4	Protein kinase family protein
HORVU.MOREX.r2.6HG0498920	HORVU.MOREX.r2.6HG0482600	0.466666	GRAS transcription factor	Protein kinase family protein
HORVU.MOREX.r2.6HG0482600	HORVU.MOREX.r2.6HG0482600	1	Protein kinase family protein	Protein kinase family protein
HORVU.MOREX.r2.6HG0469000	HORVU.MOREX.r2.6HG0494410	0.778644	Polyubiquitin	Phenylalanine ammonia-lyase
HORVU.MOREX.r2.6HG0494390	HORVU.MOREX.r2.6HG0494410	0.412213	Phenylalanine ammonia-lyase	Phenylalanine ammonia-lyase
HORVU.MOREX.r2.6HG0494410	HORVU.MOREX.r2.6HG0494410	1	Phenylalanine ammonia-lyase	Phenylalanine ammonia-lyase
HORVU.MOREX.r2.7HG0608370	HORVU.MOREX.r2.6HG0494410	0.444265	Polyubiquitin	Phenylalanine ammonia-lyase
HORVU.MOREX.r2.6HG0469030	HORVU.MOREX.r2.6HG0494410	0.532608	Polyubiquitin protein	Phenylalanine ammonia-lyase
HORVU.MOREX.r2.3HG0185770	HORVU.MOREX.r2.6HG0494410	NA	Phenylalanine ammonia-lyase	Phenylalanine ammonia-lyase
HORVU.MOREX.r2.7HG0552030	HORVU.MOREX.r2.6HG0501040	0.370656	ethylene-responsive transcription factor	WD-repeat 1
HORVU.MOREX.r2.5HG0413940	HORVU.MOREX.r2.6HG0501040	0.480604	Pseudo response regulator	WD-repeat 1
HORVU.MOREX.r2.4HG0324860	HORVU.MOREX.r2.6HG0501040	0.101048	Basic helix-loop-helix transcription factor	WD-repeat 1
HORVU.MOREX.r2.4HG0335940	HORVU.MOREX.r2.6HG0501040	0.267598	Homeobox protein, putative	WD-repeat 1
HORVU.MOREX.r2.2HG0157290	HORVU.MOREX.r2.6HG0501040	0.290895	Homeobox-leucine zipper family protein	WD-repeat 1
HORVU.MOREX.r2.4HG0333430	HORVU.MOREX.r2.6HG0501040	0.510252	ethylene-responsive transcription factor	WD-repeat 1
HORVU.MOREX.r2.1HG0069340	HORVU.MOREX.r2.6HG0501040	0.347252	Guanine nucleotide-binding protein subunit beta-1	WD-repeat 1
HORVU.MOREX.r2.7HG0562220	HORVU.MOREX.r2.6HG0501040	0.766257	Acetylglutamate kinase	WD-repeat 1
HORVU.MOREX.r2.3HG0201840	HORVU.MOREX.r2.6HG0501040	0.737492	Kinase family protein	WD-repeat 1
HORVU.MOREX.r2.5HG0394700	HORVU.MOREX.r2.6HG0501040	0.504923	ethylene-responsive transcription factor	WD-repeat 1
HORVU.MOREX.r2.5HG0426660	HORVU.MOREX.r2.6HG0501040	NA	Homeobox protein knotted-1-like 1	WD-repeat 1
HORVU.MOREX.r2.6HG0453310	HORVU.MOREX.r2.6HG0501040	NA	Kinase family protein	WD-repeat 1
HORVU.MOREX.r2.7HG0552760	HORVU.MOREX.r2.6HG0501040	0.146868	TCP transcription factor	WD-repeat 1
HORVU.MOREX.r2.6HG0509430	HORVU.MOREX.r2.6HG0501040	0.619087	ethylene-responsive transcription factor	WD-repeat 1
HORVU.MOREX.r2.6HG0510040	HORVU.MOREX.r2.6HG0501040	0.201977	TCP transcription factor	WD-repeat 1
HORVU.MOREX.r2.4HG0282910	HORVU.MOREX.r2.6HG0501040	NA	homeobox-1	WD-repeat 1
HORVU.MOREX.r2.4HG0326610	HORVU.MOREX.r2.6HG0501040	NA	Myb transcription factor	WD-repeat 1
HORVU.MOREX.r2.4HG0278480	HORVU.MOREX.r2.6HG0501040	0.282463	Homeobox protein knotted-1-like 1	WD-repeat 1
HORVU.MOREX.r2.2HG0127090	HORVU.MOREX.r2.6HG0501040	0.25362	Homeobox protein knotted-1-like 1	WD-repeat 1
HORVU.MOREX.r2.4HG0341970	HORVU.MOREX.r2.6HG0501040	0.517013	Myb transcription factor	WD-repeat 1
HORVU.MOREX.r2.5HG0401530	HORVU.MOREX.r2.6HG0501040	0.373169	Basic helix-loop-helix transcription factor	WD-repeat 1
HORVU.MOREX.r2.2HG0093860	HORVU.MOREX.r2.6HG0501040	0.485649	Two-component response regulator	WD-repeat 1
HORVU.MOREX.r2.3HG0232920	HORVU.MOREX.r2.6HG0501040	0.410698	Guanine nucleotide-binding protein beta subunit-like protein	WD-repeat 1
HORVU.MOREX.r2.7HG0549810	HORVU.MOREX.r2.6HG0501040	0.18736	Myb transcription factor	WD-repeat 1
HORVU.MOREX.r2.2HG0107650	HORVU.MOREX.r2.6HG0501040	0.587095	Acetylglutamate kinase	WD-repeat 1
HORVU.MOREX.r2.4HG0278420	HORVU.MOREX.r2.6HG0501040	NA	Homeobox protein knotted-1-like 1	WD-repeat 1
HORVU.MOREX.r2.6HG0513990	HORVU.MOREX.r2.6HG0500460	0.719883	BZIP transcription factor	Dehydration-responsive element-binding factor 1
HORVU.MOREX.r2.4HG0289970	HORVU.MOREX.r2.6HG0500460	0.804298	SWI/SNF complex subunit SWI3C	Dehydration-responsive element-binding factor 1
HORVU.MOREX.r2.6HG0473270	HORVU.MOREX.r2.6HG0500460	0.378692	Myb family transcription factor APL	Dehydration-responsive element-binding factor 1
HORVU.MOREX.r2.4HG0325410	HORVU.MOREX.r2.6HG0500460	0.321138	Topless-related protein 1	Dehydration-responsive element-binding factor 1
HORVU.MOREX.r2.7HG0550580	HORVU.MOREX.r2.6HG0500460	0.208173	BZIP transcription factor family protein	Dehydration-responsive element-binding factor 1
HORVU.MOREX.r2.7HG0612580	HORVU.MOREX.r2.6HG0500460	0.18257	Myb family transcription factor APL	Dehydration-responsive element-binding factor 1
HORVU.MOREX.r2.5HG0354620	HORVU.MOREX.r2.6HG0500460	0.174825	TCP transcription factor	Dehydration-responsive element-binding factor 1
HORVU.MOREX.r2.6HG0452230	HORVU.MOREX.r2.6HG0500460	0.230895	ATP-dependent helicase family protein	Dehydration-responsive element-binding factor 1
HORVU.MOREX.r2.5HG0402830	HORVU.MOREX.r2.6HG0500460	0.534162	BZIP transcription factor	Dehydration-responsive element-binding factor 1
HORVU.MOREX.r2.5HG0377070	HORVU.MOREX.r2.6HG0500460	0.311925	SWI/SNF complex subunit SWI3C	Dehydration-responsive element-binding factor 1
HORVU.MOREX.r2.2HG0097010	HORVU.MOREX.r2.6HG0500460	0.174498	BTB-POZ and MATH domain protein	Dehydration-responsive element-binding factor 1
HORVU.MOREX.r2.2HG0093470	HORVU.MOREX.r2.6HG0500460	0.289922	60S ribosome subunit biogenesis protein NIP7 homolog	Dehydration-responsive element-binding factor 1
HORVU.MOREX.r2.6HG0502970	HORVU.MOREX.r2.6HG0502970	1	Kinase-like protein	Kinase-like protein
HORVU.MOREX.r2.1HG0056070	HORVU.MOREX.r2.6HG0503470	0.22232	SNF1-related protein kinase regulatory subunit beta-1	Cytochrome P450 family ABA 8'-hydroxylase
HORVU.MOREX.r2.2HG0090820	HORVU.MOREX.r2.6HG0503470	NA	SNF1-related protein kinase regulatory subunit beta-1	Cytochrome P450 family ABA 8'-hydroxylase
HORVU.MOREX.r2.6HG0453580	HORVU.MOREX.r2.6HG0505010	NA	Histone H2A	Histone H2A
HORVU.MOREX.r2.3HG0269860	HORVU.MOREX.r2.6HG0505010	NA	RNA binding protein, putative	Histone H2A
HORVU.MOREX.r2.7HG0606030	HORVU.MOREX.r2.6HG0505010	NA	Histone H2A	Histone H2A
HORVU.MOREX.r2.2HG0081770	HORVU.MOREX.r2.6HG0505010	NA	Actin-related protein	Histone H2A
HORVU.MOREX.r2.5HG0404000	HORVU.MOREX.r2.6HG0505010	NA	Histone H2A	Histone H2A
HORVU.MOREX.r2.5HG0414290	HORVU.MOREX.r2.6HG0505010	NA	Histone H2A	Histone H2A
HORVU.MOREX.r2.6HG0475780	HORVU.MOREX.r2.6HG0505010	NA	SWI/SNF complex subunit SWI3B	Histone H2A
HORVU.MOREX.r2.3HG0239350	HORVU.MOREX.r2.6HG0505010	NA	Nuclear pore complex protein NUP85	Histone H2A
HORVU.MOREX.r2.5HG0422400	HORVU.MOREX.r2.6HG0505010	NA	Vacuolar protein sorting-associated 2-2-like protein	Histone H2A
HORVU.MOREX.r2.6HG0489240	HORVU.MOREX.r2.6HG0505010	NA	Armadillo repeat-containing protein LFR	Histone H2A
HORVU.MOREX.r2.6HG0452310	HORVU.MOREX.r2.6HG0505010	NA	Histone H2A	Histone H2A
HORVU.MOREX.r2.6HG0464240	HORVU.MOREX.r2.6HG0505010	NA	Histone H2A	Histone H2A
HORVU.MOREX.r2.2HG0167500	HORVU.MOREX.r2.6HG0505010	NA	Histone H2A	Histone H2A
HORVU.MOREX.r2.7HG0606070	HORVU.MOREX.r2.6HG0505010	NA	Histone H2A	Histone H2A
HORVU.MOREX.r2.6HG0505010	HORVU.MOREX.r2.6HG0505010	NA	Histone H2A	Histone H2A
HORVU.MOREX.r2.6HG0455810	HORVU.MOREX.r2.6HG0505010	NA	Histone H2A	Histone H2A
HORVU.MOREX.r2.7HG0538650	HORVU.MOREX.r2.6HG0508530	0.323736	Coatomer beta subunit, putative	Galactose-1-phosphate uridylyltransferase
HORVU.MOREX.r2.3HG0260790	HORVU.MOREX.r2.6HG0508580	0.208168	Sec14p-like phosphatidylinositol transfer family protein	Microtubule-associated protein 70-2
HORVU.MOREX.r2.2HG0149430	HORVU.MOREX.r2.6HG0508580	0.184417	Coiled-coil domain-containing protein 115	Microtubule-associated protein 70-2
HORVU.MOREX.r2.5HG0444440	HORVU.MOREX.r2.6HG0508580	0.188283	Sec14p-like phosphatidylinositol transfer family protein	Microtubule-associated protein 70-2
HORVU.MOREX.r2.5HG0444400	HORVU.MOREX.r2.6HG0508580	0.463502	Sec14p-like phosphatidylinositol transfer family protein	Microtubule-associated protein 70-2
HORVU.MOREX.r2.7HG0555300	HORVU.MOREX.r2.6HG0508580	0.305006	Microtubule-associated protein 70-2	Microtubule-associated protein 70-2
HORVU.MOREX.r2.6HG0508580	HORVU.MOREX.r2.6HG0508580	1	Microtubule-associated protein 70-2	Microtubule-associated protein 70-2
HORVU.MOREX.r2.5HG0444490	HORVU.MOREX.r2.6HG0508580	0.230299	Sec14p-like phosphatidylinositol transfer family protein	Microtubule-associated protein 70-2
HORVU.MOREX.r2.4HG0304030	HORVU.MOREX.r2.6HG0518390	0.482643	WD40 repeat-like protein	DNA helicase
HORVU.MOREX.r2.1HG0025000	HORVU.MOREX.r2.6HG0518390	0.436337	DNA helicase	DNA helicase
HORVU.MOREX.r2.3HG0194750	HORVU.MOREX.r2.6HG0518390	0.633904	Mini-chromosome maintenance complex-binding protein	DNA helicase
HORVU.MOREX.r2.3HG0266870	HORVU.MOREX.r2.6HG0518390	0.613692	Pyrroline-5-carboxylate reductase	DNA helicase
HORVU.MOREX.r2.7HG0608370	HORVU.MOREX.r2.6HG0518380	0.192626	Polyubiquitin	Plasma membrane ATPase
HORVU.MOREX.r2.6HG0469030	HORVU.MOREX.r2.6HG0518380	0.123157	Polyubiquitin protein	Plasma membrane ATPase
HORVU.MOREX.r2.6HG0469000	HORVU.MOREX.r2.6HG0518380	0.147322	Polyubiquitin	Plasma membrane ATPase
HORVU.MOREX.r2.6HG0469030	HORVU.MOREX.r2.6HG0518400	0.278346	Polyubiquitin protein	Aspartate aminotransferase
HORVU.MOREX.r2.6HG0469000	HORVU.MOREX.r2.6HG0518400	0.50223	Polyubiquitin	Aspartate aminotransferase
HORVU.MOREX.r2.1HG0074710	HORVU.MOREX.r2.6HG0518400	0.481559	Ketol-acid reductoisomerase (NADP(+))	Aspartate aminotransferase
HORVU.MOREX.r2.3HG0258670	HORVU.MOREX.r2.6HG0518400	0.355681	Small ubiquitin-related modifier	Aspartate aminotransferase
HORVU.MOREX.r2.6HG0526130	HORVU.MOREX.r2.6HG0518400	0.477536	Mitochondrial intermediate peptidase	Aspartate aminotransferase
HORVU.MOREX.r2.7HG0608370	HORVU.MOREX.r2.6HG0518400	0.448309	Polyubiquitin	Aspartate aminotransferase
HORVU.MOREX.r2.3HG0206450	HORVU.MOREX.r2.6HG0518400	0.3325	Glyoxylate reductase/hydroxypyruvate reductase	Aspartate aminotransferase
HORVU.MOREX.r2.6HG0469030	HORVU.MOREX.r2.6HG0520230	0.593538	Polyubiquitin protein	Chaperone protein dnaJ
HORVU.MOREX.r2.6HG0469000	HORVU.MOREX.r2.6HG0520230	0.655387	Polyubiquitin	Chaperone protein dnaJ
HORVU.MOREX.r2.7HG0608370	HORVU.MOREX.r2.6HG0520230	0.298594	Polyubiquitin	Chaperone protein dnaJ
HORVU.MOREX.r2.6HG0452230	HORVU.MOREX.r2.6HG0521110	0.14689	ATP-dependent helicase family protein	NAC domain protein,
HORVU.MOREX.r2.4HG0325410	HORVU.MOREX.r2.6HG0521110	0.265645	Topless-related protein 1	NAC domain protein,
HORVU.MOREX.r2.3HG0210350	HORVU.MOREX.r2.6HG0521110	0.274828	Topless-related 1-like protein	NAC domain protein,
HORVU.MOREX.r2.3HG0227320	HORVU.MOREX.r2.6HG0520620	0.691855	Transducin/WD40 repeat protein	Kinase, putative
HORVU.MOREX.r2.6HG0520620	HORVU.MOREX.r2.6HG0520620	1	Kinase, putative	Kinase, putative
HORVU.MOREX.r2.1HG0004060	HORVU.MOREX.r2.6HG0520620	0.481654	Transducin/WD40 repeat protein	Kinase, putative
HORVU.MOREX.r2.3HG0229090	HORVU.MOREX.r2.6HG0522750	0.236598	Actin-related protein 2/3 complex subunit 2	Actin-related protein 2/3 complex subunit
HORVU.MOREX.r2.5HG0397220	HORVU.MOREX.r2.6HG0522750	0.225213	Uv excision repair protein rad23, putative	Actin-related protein 2/3 complex subunit
HORVU.MOREX.r2.6HG0523370	HORVU.MOREX.r2.6HG0523370	NA	LOB domain protein-like	LOB domain protein-like
HORVU.MOREX.r2.4HG0339910	HORVU.MOREX.r2.6HG0523370	NA	LOB domain-containing protein, putative	LOB domain protein-like
HORVU.MOREX.r2.4HG0326090	HORVU.MOREX.r2.6HG0523370	NA	LOB domain protein	LOB domain protein-like
HORVU.MOREX.r2.4HG0277770	HORVU.MOREX.r2.6HG0523370	NA	LOB domain protein	LOB domain protein-like
HORVU.MOREX.r2.6HG0511040	HORVU.MOREX.r2.6HG0524330	NA	Histidine kinase	Remorin
HORVU.MOREX.r2.4HG0281710	HORVU.MOREX.r2.6HG0524330	NA	Histidine kinase	Remorin
HORVU.MOREX.r2.5HG0382610	HORVU.MOREX.r2.6HG0524330	NA	Metacaspase	Remorin
HORVU.MOREX.r2.7HG0566810	HORVU.MOREX.r2.6HG0524330	NA	RPM1-interacting protein 4	Remorin
HORVU.MOREX.r2.6HG0524330	HORVU.MOREX.r2.6HG0524330	NA	Remorin	Remorin
HORVU.MOREX.r2.4HG0295830	HORVU.MOREX.r2.6HG0502510	0.224865	Ubiquitin activating enzyme E1	TOM1-like protein 2
HORVU.MOREX.r2.1HG0023790	HORVU.MOREX.r2.6HG0502510	0.248551	PRA1 family protein	TOM1-like protein 2
HORVU.MOREX.r2.5HG0385350	HORVU.MOREX.r2.6HG0502510	0.369869	Ubiquitin activating enzyme E1	TOM1-like protein 2
HORVU.MOREX.r2.2HG0089140	HORVU.MOREX.r2.6HG0502510	0.246022	Ubiquitin activating enzyme E1	TOM1-like protein 2
HORVU.MOREX.r2.2HG0098330	HORVU.MOREX.r2.6HG0502510	0.337266	2,3,4,5-tetrahydropyridine-2,6-dicarboxylate N-acetyltransferase	TOM1-like protein 2
HORVU.MOREX.r2.3HG0195880	HORVU.MOREX.r2.6HG0502510	0.149302	PRA1 family protein	TOM1-like protein 2
HORVU.MOREX.r2.4HG0304810	HORVU.MOREX.r2.6HG0502510	0.415703	Xaa-pro aminopeptidase, putative	TOM1-like protein 2
HORVU.MOREX.r2.7HG0540790	HORVU.MOREX.r2.6HG0502510	0.495529	2,3,4,5-tetrahydropyridine-2,6-dicarboxylate N-acetyltransferase	TOM1-like protein 2
HORVU.MOREX.r2.3HG0218480	HORVU.MOREX.r2.6HG0502510	0.244251	2,3,4,5-tetrahydropyridine-2,6-dicarboxylate N-acetyltransferase	TOM1-like protein 2
HORVU.MOREX.r2.4HG0319700	HORVU.MOREX.r2.6HG0502510	0.230617	Ubiquitin activating enzyme E1	TOM1-like protein 2
HORVU.MOREX.r2.2HG0149430	HORVU.MOREX.r2.6HG0498050	0.396423	Coiled-coil domain-containing protein 115	E3 ubiquitin-protein ligase BRE1-like 1
HORVU.MOREX.r2.5HG0377810	HORVU.MOREX.r2.6HG0498050	0.441995	Receptor-like protein kinase	E3 ubiquitin-protein ligase BRE1-like 1
HORVU.MOREX.r2.2HG0098360	HORVU.MOREX.r2.6HG0498050	0.161406	Stomatal closure-related actin-binding protein 1	E3 ubiquitin-protein ligase BRE1-like 1
HORVU.MOREX.r2.5HG0444400	HORVU.MOREX.r2.6HG0498050	0.522755	Sec14p-like phosphatidylinositol transfer family protein	E3 ubiquitin-protein ligase BRE1-like 1
HORVU.MOREX.r2.3HG0260790	HORVU.MOREX.r2.6HG0498050	0.41214	Sec14p-like phosphatidylinositol transfer family protein	E3 ubiquitin-protein ligase BRE1-like 1
HORVU.MOREX.r2.7HG0555300	HORVU.MOREX.r2.6HG0498050	0.240353	Microtubule-associated protein 70-2	E3 ubiquitin-protein ligase BRE1-like 1
HORVU.MOREX.r2.6HG0479730	HORVU.MOREX.r2.6HG0498050	0.373688	F-box protein	E3 ubiquitin-protein ligase BRE1-like 1
HORVU.MOREX.r2.4HG0325420	HORVU.MOREX.r2.6HG0498050	0.505415	Patatin	E3 ubiquitin-protein ligase BRE1-like 1
HORVU.MOREX.r2.6HG0508580	HORVU.MOREX.r2.6HG0498050	0.38148	Microtubule-associated protein 70-2	E3 ubiquitin-protein ligase BRE1-like 1
HORVU.MOREX.r2.5HG0444490	HORVU.MOREX.r2.6HG0498050	0.268108	Sec14p-like phosphatidylinositol transfer family protein	E3 ubiquitin-protein ligase BRE1-like 1
HORVU.MOREX.r2.7HG0610200	HORVU.MOREX.r2.6HG0498050	0.219464	AUGMIN subunit 2	E3 ubiquitin-protein ligase BRE1-like 1
HORVU.MOREX.r2.7HG0610280	HORVU.MOREX.r2.6HG0498050	0.495404	AUGMIN subunit 2	E3 ubiquitin-protein ligase BRE1-like 1
HORVU.MOREX.r2.3HG0246050	HORVU.MOREX.r2.6HG0498050	0.239156	Stomatal closure-related actin-binding protein 1	E3 ubiquitin-protein ligase BRE1-like 1
HORVU.MOREX.r2.5HG0379030	HORVU.MOREX.r2.6HG0498050	0.565567	Acyl-CoA N-acyltransferases-like protein	E3 ubiquitin-protein ligase BRE1-like 1
HORVU.MOREX.r2.7HG0597050	HORVU.MOREX.r2.6HG0498050	0.371497	F-box protein	E3 ubiquitin-protein ligase BRE1-like 1
HORVU.MOREX.r2.5HG0415950	HORVU.MOREX.r2.6HG0498050	0.28313	26S proteasome regulatory subunit	E3 ubiquitin-protein ligase BRE1-like 1
HORVU.MOREX.r2.6HG0498050	HORVU.MOREX.r2.6HG0498050	1	E3 ubiquitin-protein ligase BRE1-like 1	E3 ubiquitin-protein ligase BRE1-like 1
HORVU.MOREX.r2.5HG0444440	HORVU.MOREX.r2.6HG0498050	0.211579	Sec14p-like phosphatidylinositol transfer family protein	E3 ubiquitin-protein ligase BRE1-like 1
HORVU.MOREX.r2.3HG0187230	HORVU.MOREX.r2.6HG0498050	0.601419	Mediator of RNA polymerase II transcription subunit 22	E3 ubiquitin-protein ligase BRE1-like 1
HORVU.MOREX.r2.4HG0332910	HORVU.MOREX.r2.6HG0498050	0.285586	26S proteasome regulatory subunit	E3 ubiquitin-protein ligase BRE1-like 1
HORVU.MOREX.r2.5HG0357370	HORVU.MOREX.r2.6HG0498050	0.521638	Stomatal closure-related actin-binding protein 1	E3 ubiquitin-protein ligase BRE1-like 1
HORVU.MOREX.r2.3HG0184800	HORVU.MOREX.r2.6HG0498060	0.317965	MYB transcription factor	ethylene-responsive transcription factor
HORVU.MOREX.r2.6HG0475780	HORVU.MOREX.r2.6HG0498060	0.193878	SWI/SNF complex subunit SWI3B	ethylene-responsive transcription factor
HORVU.MOREX.r2.6HG0475780	HORVU.MOREX.r2.6HG0498070	NA	SWI/SNF complex subunit SWI3B	ethylene-responsive transcription factor
HORVU.MOREX.r2.3HG0184800	HORVU.MOREX.r2.6HG0498070	NA	MYB transcription factor	ethylene-responsive transcription factor
HORVU.MOREX.r2.2HG0103970	HORVU.MOREX.r2.6HG0493020	NA	30S ribosomal protein S3	60S ribosomal protein L27
HORVU.MOREX.r2.1HG0018910	HORVU.MOREX.r2.6HG0493020	NA	60S ribosomal protein L18-like protein	60S ribosomal protein L27
HORVU.MOREX.r2.4HG0337450	HORVU.MOREX.r2.6HG0493020	NA	50S ribosomal protein L2	60S ribosomal protein L27
HORVU.MOREX.r2.6HG0458380	HORVU.MOREX.r2.6HG0493020	NA	THO complex subunit 7	60S ribosomal protein L27
HORVU.MOREX.r2.3HG0232920	HORVU.MOREX.r2.6HG0493020	NA	Guanine nucleotide-binding protein beta subunit-like protein	60S ribosomal protein L27
HORVU.MOREX.r2.2HG0120460	HORVU.MOREX.r2.6HG0493020	NA	Ribosomal protein L15	60S ribosomal protein L27
HORVU.MOREX.r2.7HG0528960	HORVU.MOREX.r2.6HG0493020	NA	50S ribosomal protein L6	60S ribosomal protein L27
HORVU.MOREX.r2.7HG0577600	HORVU.MOREX.r2.6HG0493020	NA	60S ribosomal protein L13	60S ribosomal protein L27
HORVU.MOREX.r2.4HG0291050	HORVU.MOREX.r2.6HG0493020	NA	60S acidic ribosomal protein P0	60S ribosomal protein L27
HORVU.MOREX.r2.5HG0401170	HORVU.MOREX.r2.6HG0493020	NA	30S ribosomal protein S12	60S ribosomal protein L27
HORVU.MOREX.r2.2HG0124730	HORVU.MOREX.r2.6HG0493020	NA	50S ribosomal protein L6	60S ribosomal protein L27
HORVU.MOREX.r2.5HG0437010	HORVU.MOREX.r2.6HG0493020	NA	30S ribosomal protein S12	60S ribosomal protein L27
HORVU.MOREX.r2.3HG0192970	HORVU.MOREX.r2.6HG0493020	NA	30S ribosomal protein S7	60S ribosomal protein L27
HORVU.MOREX.r2.2HG0100920	HORVU.MOREX.r2.6HG0493020	NA	30S ribosomal protein S4	60S ribosomal protein L27
HORVU.MOREX.r2.5HG0433840	HORVU.MOREX.r2.6HG0493020	NA	60S ribosomal protein L7	60S ribosomal protein L27
HORVU.MOREX.r2.6HG0523600	HORVU.MOREX.r2.6HG0493020	NA	rRNA 2'-O-methyltransferase fibrillarin 2	60S ribosomal protein L27
HORVU.MOREX.r2.4HG0295930	HORVU.MOREX.r2.6HG0493020	NA	Clathrin heavy chain	60S ribosomal protein L27
HORVU.MOREX.r2.7HG0567650	HORVU.MOREX.r2.6HG0493020	NA	50S ribosomal protein L22	60S ribosomal protein L27
HORVU.MOREX.r2.1HG0058860	HORVU.MOREX.r2.6HG0493020	NA	30S ribosomal protein S12	60S ribosomal protein L27
HORVU.MOREX.r2.3HG0182620	HORVU.MOREX.r2.6HG0493020	NA	50S ribosomal protein L6	60S ribosomal protein L27
HORVU.MOREX.r2.1HG0059160	HORVU.MOREX.r2.6HG0493020	NA	30S ribosomal protein S8, putative	60S ribosomal protein L27
HORVU.MOREX.r2.3HG0182650	HORVU.MOREX.r2.6HG0493020	NA	50S ribosomal protein L6	60S ribosomal protein L27
HORVU.MOREX.r2.3HG0201870	HORVU.MOREX.r2.6HG0493020	NA	50S ribosomal protein L5	60S ribosomal protein L27
HORVU.MOREX.r2.2HG0086170	HORVU.MOREX.r2.6HG0493020	NA	40S ribosomal protein S6	60S ribosomal protein L27
HORVU.MOREX.r2.4HG0314500	HORVU.MOREX.r2.6HG0493020	NA	Ribosomal protein L19	60S ribosomal protein L27
HORVU.MOREX.r2.5HG0430630	HORVU.MOREX.r2.6HG0493020	NA	30S ribosomal protein S13	60S ribosomal protein L27
HORVU.MOREX.r2.2HG0161120	HORVU.MOREX.r2.6HG0493020	NA	Ribosomal protein L11	60S ribosomal protein L27
HORVU.MOREX.r2.5HG0409860	HORVU.MOREX.r2.6HG0493020	NA	60S ribosomal protein L7a	60S ribosomal protein L27
HORVU.MOREX.r2.1HG0069340	HORVU.MOREX.r2.6HG0493020	NA	Guanine nucleotide-binding protein subunit beta-1	60S ribosomal protein L27
HORVU.MOREX.r2.7HG0612250	HORVU.MOREX.r2.6HG0493020	NA	rRNA 2'-O-methyltransferase fibrillarin 2	60S ribosomal protein L27
HORVU.MOREX.r2.2HG0137370	HORVU.MOREX.r2.6HG0493020	NA	60S ribosomal protein L5	60S ribosomal protein L27
HORVU.MOREX.r2.3HG0239930	HORVU.MOREX.r2.6HG0493020	NA	Leucine-rich repeat receptor-like protein kinase family	60S ribosomal protein L27
HORVU.MOREX.r2.3HG0253300	HORVU.MOREX.r2.6HG0493020	NA	30S ribosomal protein S12	60S ribosomal protein L27
HORVU.MOREX.r2.7HG0577670	HORVU.MOREX.r2.6HG0493020	NA	30S ribosomal protein S3	60S ribosomal protein L27
HORVU.MOREX.r2.5HG0376740	HORVU.MOREX.r2.6HG0493020	NA	Ribosomal protein L3	60S ribosomal protein L27
HORVU.MOREX.r2.4HG0343480	HORVU.MOREX.r2.6HG0493020	NA	50S ribosomal protein L5	60S ribosomal protein L27
HORVU.MOREX.r2.4HG0291480	HORVU.MOREX.r2.6HG0493020	NA	Ribosomal protein L3	60S ribosomal protein L27
HORVU.MOREX.r2.6HG0469030	HORVU.MOREX.r2.6HG0493020	NA	Polyubiquitin protein	60S ribosomal protein L27
HORVU.MOREX.r2.3HG0250830	HORVU.MOREX.r2.6HG0493020	NA	Ribosomal protein	60S ribosomal protein L27
HORVU.MOREX.r2.1HG0024100	HORVU.MOREX.r2.6HG0493020	NA	50S ribosomal protein L5	60S ribosomal protein L27
HORVU.MOREX.r2.7HG0608370	HORVU.MOREX.r2.6HG0493020	NA	Polyubiquitin	60S ribosomal protein L27
HORVU.MOREX.r2.7HG0557100	HORVU.MOREX.r2.6HG0493020	NA	ADP,ATP carrier protein, mitochondrial	60S ribosomal protein L27
HORVU.MOREX.r2.5HG0389330	HORVU.MOREX.r2.6HG0493020	NA	40S ribosomal protein S19	60S ribosomal protein L27
HORVU.MOREX.r2.7HG0584290	HORVU.MOREX.r2.6HG0493020	NA	40S ribosomal protein S13	60S ribosomal protein L27
HORVU.MOREX.r2.5HG0436100	HORVU.MOREX.r2.6HG0493020	NA	50S ribosomal protein L17	60S ribosomal protein L27
HORVU.MOREX.r2.5HG0383630	HORVU.MOREX.r2.6HG0493020	NA	30S ribosomal protein S9	60S ribosomal protein L27
HORVU.MOREX.r2.6HG0454200	HORVU.MOREX.r2.6HG0493020	NA	60S ribosomal protein L13	60S ribosomal protein L27
HORVU.MOREX.r2.6HG0481770	HORVU.MOREX.r2.6HG0493020	NA	50S ribosomal protein L21	60S ribosomal protein L27
HORVU.MOREX.r2.1HG0031760	HORVU.MOREX.r2.6HG0493020	NA	60S ribosomal protein L21	60S ribosomal protein L27
HORVU.MOREX.r2.4HG0294890	HORVU.MOREX.r2.6HG0493020	NA	30S ribosomal protein S9	60S ribosomal protein L27
HORVU.MOREX.r2.7HG0572270	HORVU.MOREX.r2.6HG0493020	NA	Ribosomal protein	60S ribosomal protein L27
HORVU.MOREX.r2.7HG0608850	HORVU.MOREX.r2.6HG0493020	NA	30S ribosomal protein S11	60S ribosomal protein L27
HORVU.MOREX.r2.1HG0018040	HORVU.MOREX.r2.6HG0493020	NA	40S ribosomal protein S4	60S ribosomal protein L27
HORVU.MOREX.r2.4HG0336330	HORVU.MOREX.r2.6HG0493020	NA	60S ribosomal protein L4	60S ribosomal protein L27
HORVU.MOREX.r2.7HG0584220	HORVU.MOREX.r2.6HG0493020	NA	40S ribosomal protein S13	60S ribosomal protein L27
HORVU.MOREX.r2.2HG0129270	HORVU.MOREX.r2.6HG0493020	NA	50S ribosomal protein L13	60S ribosomal protein L27
HORVU.MOREX.r2.6HG0488990	HORVU.MOREX.r2.6HG0493020	NA	60S ribosomal protein L6	60S ribosomal protein L27
HORVU.MOREX.r2.3HG0202480	HORVU.MOREX.r2.6HG0493020	NA	50S ribosomal protein L24	60S ribosomal protein L27
HORVU.MOREX.r2.2HG0137270	HORVU.MOREX.r2.6HG0493020	NA	30S ribosomal protein S11	60S ribosomal protein L27
HORVU.MOREX.r2.5HG0389360	HORVU.MOREX.r2.6HG0493020	NA	50S ribosomal protein L22	60S ribosomal protein L27
HORVU.MOREX.r2.2HG0158350	HORVU.MOREX.r2.6HG0493020	NA	30S ribosomal protein S17	60S ribosomal protein L27
HORVU.MOREX.r2.6HG0469000	HORVU.MOREX.r2.6HG0493020	NA	Polyubiquitin	60S ribosomal protein L27
HORVU.MOREX.r2.6HG0492210	HORVU.MOREX.r2.6HG0493020	NA	30S ribosomal protein S17	60S ribosomal protein L27
HORVU.MOREX.r2.1HG0020680	HORVU.MOREX.r2.6HG0493020	NA	Ribosomal protein	60S ribosomal protein L27
HORVU.MOREX.r2.6HG0501850	HORVU.MOREX.r2.6HG0493020	NA	AP-2 complex subunit mu	60S ribosomal protein L27
HORVU.MOREX.r2.3HG0252910	HORVU.MOREX.r2.6HG0493020	NA	30S ribosomal protein S8, putative	60S ribosomal protein L27
HORVU.MOREX.r2.5HG0421790	HORVU.MOREX.r2.6HG0493020	NA	60S ribosomal protein L5	60S ribosomal protein L27
HORVU.MOREX.r2.5HG0378380	HORVU.MOREX.r2.6HG0493020	NA	30S ribosomal protein S4	60S ribosomal protein L27
HORVU.MOREX.r2.5HG0431510	HORVU.MOREX.r2.6HG0493020	NA	60S ribosomal protein L4	60S ribosomal protein L27
HORVU.MOREX.r2.6HG0505700	HORVU.MOREX.r2.6HG0493020	NA	ADP,ATP carrier protein, mitochondrial	60S ribosomal protein L27
HORVU.MOREX.r2.4HG0288160	HORVU.MOREX.r2.6HG0493020	NA	Ribosomal protein	60S ribosomal protein L27
HORVU.MOREX.r2.4HG0343460	HORVU.MOREX.r2.6HG0493020	NA	60S ribosomal protein L21	60S ribosomal protein L27
HORVU.MOREX.r2.4HG0294910	HORVU.MOREX.r2.6HG0493020	NA	30S ribosomal protein S9	60S ribosomal protein L27
HORVU.MOREX.r2.2HG0159710	HORVU.MOREX.r2.6HG0493020	NA	60S ribosomal protein L7	60S ribosomal protein L27
HORVU.MOREX.r2.7HG0558580	HORVU.MOREX.r2.6HG0493020	NA	50S ribosomal protein L6	60S ribosomal protein L27
HORVU.MOREX.r2.4HG0331970	HORVU.MOREX.r2.6HG0493020	NA	40S ribosomal protein S3a	60S ribosomal protein L27
HORVU.MOREX.r2.7HG0568170	HORVU.MOREX.r2.6HG0493020	NA	60S ribosomal protein L7a	60S ribosomal protein L27
HORVU.MOREX.r2.1HG0026750	HORVU.MOREX.r2.6HG0493020	NA	40S ribosomal protein S3a	60S ribosomal protein L27
HORVU.MOREX.r2.5HG0385600	HORVU.MOREX.r2.6HG0493020	NA	Clathrin heavy chain	60S ribosomal protein L27
HORVU.MOREX.r2.2HG0092650	HORVU.MOREX.r2.6HG0493020	NA	Ribosomal protein L19	60S ribosomal protein L27
HORVU.MOREX.r2.7HG0582810	HORVU.MOREX.r2.6HG0493020	NA	60S acidic ribosomal protein P0	60S ribosomal protein L27
HORVU.MOREX.r2.2HG0102110	HORVU.MOREX.r2.6HG0493020	NA	40S ribosomal protein S6	60S ribosomal protein L27
HORVU.MOREX.r2.6HG0502730	HORVU.MOREX.r2.6HG0493020	NA	50S ribosomal protein L11	60S ribosomal protein L27
HORVU.MOREX.r2.2HG0092790	HORVU.MOREX.r2.6HG0493020	NA	60S ribosomal protein L18	60S ribosomal protein L27
HORVU.MOREX.r2.3HG0224180	HORVU.MOREX.r2.6HG0460020	0.198893	Ubiquitin-related family protein	MALE GAMETOPHYTE DEFECTIVE 1
HORVU.MOREX.r2.7HG0544560	HORVU.MOREX.r2.6HG0460020	0.782864	Metaxin-related	MALE GAMETOPHYTE DEFECTIVE 1
HORVU.MOREX.r2.1HG0042520	HORVU.MOREX.r2.6HG0460020	0.70193	E2 ubiquitin-conjugating-like enzyme	MALE GAMETOPHYTE DEFECTIVE 1
HORVU.MOREX.r2.6HG0512020	HORVU.MOREX.r2.6HG0460020	0.671489	Glutamyl-tRNA(Gln) amidotransferase subunit A	MALE GAMETOPHYTE DEFECTIVE 1
HORVU.MOREX.r2.4HG0343670	HORVU.MOREX.r2.6HG0460020	0.289565	E2 ubiquitin-conjugating-like enzyme	MALE GAMETOPHYTE DEFECTIVE 1
HORVU.MOREX.r2.5HG0390870	HORVU.MOREX.r2.2HG0166380	0.450234	Chromosome transmission fidelity protein 8	Cell division protein ftsZ
HORVU.MOREX.r2.2HG0166380	HORVU.MOREX.r2.2HG0166380	1	Cell division protein ftsZ	Cell division protein ftsZ
HORVU.MOREX.r2.5HG0429310	HORVU.MOREX.r2.7HG0537910	0.21239	Glutathione-S-transferase	Glutathione S-transferase
HORVU.MOREX.r2.7HG0537910	HORVU.MOREX.r2.7HG0537910	1	Glutathione S-transferase	Glutathione S-transferase
HORVU.MOREX.r2.5HG0429320	HORVU.MOREX.r2.7HG0537910	0.427397	Glutathione-S-transferase	Glutathione S-transferase
HORVU.MOREX.r2.2HG0178450	HORVU.MOREX.r2.7HG0537910	NA	Glutathione S-transferase	Glutathione S-transferase
HORVU.MOREX.r2.6HG0505220	HORVU.MOREX.r2.7HG0537910	0.798932	Pyrophosphate--fructose 6-phosphate 1-phosphotransferase subunit alpha	Glutathione S-transferase
HORVU.MOREX.r2.5HG0363830	HORVU.MOREX.r2.7HG0537910	0.440549	Pyrophosphate--fructose 6-phosphate 1-phosphotransferase subunit alpha	Glutathione S-transferase
HORVU.MOREX.r2.5HG0422070	HORVU.MOREX.r2.7HG0537910	NA	Glutathione S-transferase	Glutathione S-transferase
HORVU.MOREX.r2.7HG0561100	HORVU.MOREX.r2.7HG0537910	0.384731	Pyrophosphate--fructose 6-phosphate 1-phosphotransferase subunit alpha	Glutathione S-transferase
HORVU.MOREX.r2.1HG0044460	HORVU.MOREX.r2.7HG0555440	0.184503	Nitrate transporter 1.1	Cytochrome P450
HORVU.MOREX.r2.5HG0430070	HORVU.MOREX.r2.7HG0555440	0.129764	Purine permease-like protein	Cytochrome P450
HORVU.MOREX.r2.5HG0434210	HORVU.MOREX.r2.7HG0555440	0.33179	Signal peptidase I	Cytochrome P450
HORVU.MOREX.r2.5HG0404200	HORVU.MOREX.r2.7HG0555440	NA	Purine permease-like protein	Cytochrome P450
HORVU.MOREX.r2.2HG0100640	HORVU.MOREX.r2.7HG0555440	0.436461	Transmembrane emp24 domain-containing protein	Cytochrome P450
HORVU.MOREX.r2.1HG0047070	HORVU.MOREX.r2.7HG0555440	0.292089	Signal peptidase I	Cytochrome P450
HORVU.MOREX.r2.6HG0469030	HORVU.MOREX.r2.7HG0555440	0.32915	Polyubiquitin protein	Cytochrome P450
HORVU.MOREX.r2.7HG0568050	HORVU.MOREX.r2.7HG0555440	0.386254	Transmembrane emp24 domain-containing protein	Cytochrome P450
HORVU.MOREX.r2.7HG0580730	HORVU.MOREX.r2.7HG0555440	0.166523	Nitrate transporter 1.1	Cytochrome P450
HORVU.MOREX.r2.4HG0346560	HORVU.MOREX.r2.7HG0555440	NA	Nitrate transporter 1.1	Cytochrome P450
HORVU.MOREX.r2.5HG0404230	HORVU.MOREX.r2.7HG0555440	0.317651	Purine permease-like protein	Cytochrome P450
HORVU.MOREX.r2.5HG0404270	HORVU.MOREX.r2.7HG0555440	0.336303	Purine permease-like protein	Cytochrome P450
HORVU.MOREX.r2.6HG0469000	HORVU.MOREX.r2.7HG0555440	0.294286	Polyubiquitin	Cytochrome P450
HORVU.MOREX.r2.7HG0608370	HORVU.MOREX.r2.7HG0555440	0.303545	Polyubiquitin	Cytochrome P450
HORVU.MOREX.r2.6HG0458690	HORVU.MOREX.r2.7HG0555440	0.342518	Golgi SNAP receptor complex member 1	Cytochrome P450
HORVU.MOREX.r2.5HG0377370	HORVU.MOREX.r2.UnG0625130	0.134735	NAD-dependent protein deacylase	ATP synthase subunit alpha
HORVU.MOREX.r2.6HG0469030	HORVU.MOREX.r2.UnG0625130	0.247899	Polyubiquitin protein	ATP synthase subunit alpha
HORVU.MOREX.r2.7HG0608370	HORVU.MOREX.r2.UnG0625130	0.151945	Polyubiquitin	ATP synthase subunit alpha
HORVU.MOREX.r2.6HG0469000	HORVU.MOREX.r2.UnG0625130	0.227022	Polyubiquitin	ATP synthase subunit alpha
HORVU.MOREX.r2.5HG0377070	HORVU.MOREX.r2.7HG0557450	0.552905	SWI/SNF complex subunit SWI3C	Basic helix-loop-helix transcription factor
HORVU.MOREX.r2.4HG0289970	HORVU.MOREX.r2.7HG0557450	0.320879	SWI/SNF complex subunit SWI3C	Basic helix-loop-helix transcription factor
HORVU.MOREX.r2.6HG0452230	HORVU.MOREX.r2.7HG0557450	0.194289	ATP-dependent helicase family protein	Basic helix-loop-helix transcription factor
HORVU.MOREX.r2.1HG0011560	HORVU.MOREX.r2.7HG0558910	0.256769	Phosphoinositide phospholipase C	Nucleotide/sugar transporter family protein
HORVU.MOREX.r2.1HG0011580	HORVU.MOREX.r2.7HG0558910	0.332126	Phosphoinositide phospholipase C	Nucleotide/sugar transporter family protein
HORVU.MOREX.r2.7HG0596060	HORVU.MOREX.r2.7HG0558910	0.438787	Ras-related protein, expressed	Nucleotide/sugar transporter family protein
HORVU.MOREX.r2.3HG0203270	HORVU.MOREX.r2.7HG0555510	0.420593	TPR repeat-containing thioredoxin TTL1	Cysteine-rich repeat secretory protein
HORVU.MOREX.r2.3HG0225160	HORVU.MOREX.r2.7HG0555510	0.308107	TPR repeat-containing thioredoxin TTL1	Cysteine-rich repeat secretory protein
HORVU.MOREX.r2.7HG0534430	HORVU.MOREX.r2.7HG0555510	0.461149	LMBR1-like membrane protein	Cysteine-rich repeat secretory protein
HORVU.MOREX.r2.1HG0076940	HORVU.MOREX.r2.7HG0555510	0.166017	TPR repeat-containing thioredoxin TTL1	Cysteine-rich repeat secretory protein
HORVU.MOREX.r2.5HG0377810	HORVU.MOREX.r2.7HG0555460	0.589489	Receptor-like protein kinase	Heat-shock protein, putative
HORVU.MOREX.r2.7HG0615620	HORVU.MOREX.r2.7HG0555460	0.558995	Photosystem II reaction center PsbP family protein	Heat-shock protein, putative
HORVU.MOREX.r2.5HG0434470	HORVU.MOREX.r2.7HG0555460	0.683026	Photosystem I reaction center subunit II	Heat-shock protein, putative
HORVU.MOREX.r2.7HG0527360	HORVU.MOREX.r2.7HG0555460	0.218819	Nucleic acid-binding, OB-fold	Heat-shock protein, putative
HORVU.MOREX.r2.5HG0442940	HORVU.MOREX.r2.7HG0555460	0.293713	YacP-like NYN domain protein	Heat-shock protein, putative
HORVU.MOREX.r2.5HG0412970	HORVU.MOREX.r2.7HG0555460	0.206843	F-box protein PP2-A13	Heat-shock protein, putative
HORVU.MOREX.r2.5HG0388190	HORVU.MOREX.r2.7HG0555460	0.367133	Plastid-lipid-associated protein	Heat-shock protein, putative
HORVU.MOREX.r2.2HG0154950	HORVU.MOREX.r2.7HG0555460	0.522334	F-box protein PP2-A13	Heat-shock protein, putative
HORVU.MOREX.r2.3HG0240360	HORVU.MOREX.r2.7HG0555460	0.391008	Nucleic acid-binding, OB-fold	Heat-shock protein, putative
HORVU.MOREX.r2.1HG0040100	HORVU.MOREX.r2.7HG0555460	0.711755	F-box protein PP2-A13	Heat-shock protein, putative
HORVU.MOREX.r2.4HG0311100	HORVU.MOREX.r2.7HG0579590	0.424967	14-3-3 protein	ATP-dependent RNA helicase DeaD
HORVU.MOREX.r2.5HG0402780	HORVU.MOREX.r2.7HG0579590	0.55729	UPF0396 protein	ATP-dependent RNA helicase DeaD
HORVU.MOREX.r2.4HG0281090	HORVU.MOREX.r2.7HG0579590	0.550287	14-3-3 protein	ATP-dependent RNA helicase DeaD
HORVU.MOREX.r2.2HG0143420	HORVU.MOREX.r2.7HG0579590	0.620847	14-3-3 protein	ATP-dependent RNA helicase DeaD
HORVU.MOREX.r2.2HG0089200	HORVU.MOREX.r2.7HG0560150	0.701594	Eukaryotic translation initiation factor 2 subunit alpha	Carboxyl methyltransferase
HORVU.MOREX.r2.3HG0225410	HORVU.MOREX.r2.7HG0560150	0.363046	N-alpha-acetyltransferase 16, NatA auxiliary subunit	Carboxyl methyltransferase
HORVU.MOREX.r2.4HG0331210	HORVU.MOREX.r2.7HG0560150	0.67942	Protein kinase	Carboxyl methyltransferase
HORVU.MOREX.r2.4HG0315180	HORVU.MOREX.r2.7HG0560150	0.686884	Eukaryotic translation initiation factor 2 beta subunit, putative, expressed	Carboxyl methyltransferase
HORVU.MOREX.r2.4HG0319410	HORVU.MOREX.r2.7HG0560150	0.805496	Eukaryotic translation initiation factor 2 subunit alpha	Carboxyl methyltransferase
HORVU.MOREX.r2.5HG0425760	HORVU.MOREX.r2.7HG0560150	0.352305	Protein kinase	Carboxyl methyltransferase
HORVU.MOREX.r2.5HG0425890	HORVU.MOREX.r2.7HG0560150	0.606767	Protein kinase	Carboxyl methyltransferase
HORVU.MOREX.r2.2HG0091750	HORVU.MOREX.r2.7HG0560150	NA	Eukaryotic translation initiation factor 2 subunit beta	Carboxyl methyltransferase
HORVU.MOREX.r2.2HG0128840	HORVU.MOREX.r2.7HG0560150	0.257001	Protein kinase	Carboxyl methyltransferase
HORVU.MOREX.r2.3HG0212800	HORVU.MOREX.r2.7HG0567570	0.232068	Glutamate--tRNA ligase	Tyrosine--tRNA ligase
HORVU.MOREX.r2.1HG0064440	HORVU.MOREX.r2.7HG0567570	0.576916	Glutamate--tRNA ligase	Tyrosine--tRNA ligase
HORVU.MOREX.r2.3HG0247870	HORVU.MOREX.r2.7HG0567570	0.502893	Methionine-tRNA ligase, putative	Tyrosine--tRNA ligase
HORVU.MOREX.r2.5HG0374940	HORVU.MOREX.r2.7HG0581610	0.212157	E3 ubiquitin-protein ligase	Tyrosine--tRNA ligase
HORVU.MOREX.r2.1HG0047420	HORVU.MOREX.r2.7HG0581610	0.212353	Threonine--tRNA ligase	Tyrosine--tRNA ligase
HORVU.MOREX.r2.5HG0431990	HORVU.MOREX.r2.7HG0581610	0.808504	rRNA-processing protein efg1	Tyrosine--tRNA ligase
HORVU.MOREX.r2.6HG0464080	HORVU.MOREX.r2.7HG0581610	0.601824	26S proteasome non-ATPase regulatory subunit-like protein	Tyrosine--tRNA ligase
HORVU.MOREX.r2.4HG0326700	HORVU.MOREX.r2.7HG0581610	0.612972	26S proteasome non-ATPase regulatory subunit 4	Tyrosine--tRNA ligase
HORVU.MOREX.r2.3HG0190470	HORVU.MOREX.r2.7HG0581610	0.878308	Threonine--tRNA ligase	Tyrosine--tRNA ligase
HORVU.MOREX.r2.2HG0138210	HORVU.MOREX.r2.7HG0589900	0.323594	Exocyst complex component, putative	Auxin-responsive protein
HORVU.MOREX.r2.7HG0549250	HORVU.MOREX.r2.7HG0589900	0.802527	Auxin response factor	Auxin-responsive protein
HORVU.MOREX.r2.3HG0232110	HORVU.MOREX.r2.7HG0589900	0.667518	DNA-directed RNA polymerase III subunit RPC3	Auxin-responsive protein
HORVU.MOREX.r2.7HG0581950	HORVU.MOREX.r2.7HG0589900	0.236902	Lysine-specific histone demethylase 1-like protein	Auxin-responsive protein
HORVU.MOREX.r2.6HG0510040	HORVU.MOREX.r2.7HG0589900	0.213556	TCP transcription factor	Auxin-responsive protein
HORVU.MOREX.r2.4HG0325410	HORVU.MOREX.r2.7HG0589900	0.231782	Topless-related protein 1	Auxin-responsive protein
HORVU.MOREX.r2.2HG0176090	HORVU.MOREX.r2.7HG0589900	0.404868	Auxin response factor	Auxin-responsive protein
HORVU.MOREX.r2.7HG0589900	HORVU.MOREX.r2.7HG0589900	1	Auxin-responsive protein	Auxin-responsive protein
HORVU.MOREX.r2.1HG0071140	HORVU.MOREX.r2.7HG0589900	0.554239	Auxin-responsive protein	Auxin-responsive protein
HORVU.MOREX.r2.1HG0021150	HORVU.MOREX.r2.7HG0589900	0.180617	DNA-directed RNA polymerase subunit	Auxin-responsive protein
HORVU.MOREX.r2.6HG0475780	HORVU.MOREX.r2.7HG0589900	0.215786	SWI/SNF complex subunit SWI3B	Auxin-responsive protein
HORVU.MOREX.r2.6HG0489240	HORVU.MOREX.r2.7HG0589900	0.215592	Armadillo repeat-containing protein LFR	Auxin-responsive protein
HORVU.MOREX.r2.3HG0203860	HORVU.MOREX.r2.7HG0589900	0.454744	Transcription factor, TCP	Auxin-responsive protein
HORVU.MOREX.r2.7HG0552760	HORVU.MOREX.r2.7HG0589900	0.169846	TCP transcription factor	Auxin-responsive protein
HORVU.MOREX.r2.3HG0206810	HORVU.MOREX.r2.7HG0589900	0.350101	Auxin-responsive protein	Auxin-responsive protein
HORVU.MOREX.r2.6HG0469590	HORVU.MOREX.r2.7HG0589900	0.773825	DNA-directed RNA polymerase subunit	Auxin-responsive protein
HORVU.MOREX.r2.1HG0014210	HORVU.MOREX.r2.7HG0589900	0.37148	Bushy growth protein	Auxin-responsive protein
HORVU.MOREX.r2.3HG0262430	HORVU.MOREX.r2.7HG0589900	NA	Nuclear transcription factor Y subunit B	Auxin-responsive protein
HORVU.MOREX.r2.2HG0172010	HORVU.MOREX.r2.7HG0593100	0.220344	transcription factor-like protein	ATP-dependent Clp protease proteolytic subunit
HORVU.MOREX.r2.4HG0334150	HORVU.MOREX.r2.7HG0598080	0.506297	Phosphoserine aminotransferase	S-adenosyl-L-methionine-dependent methyltransferases superfamily protein
HORVU.MOREX.r2.4HG0314380	HORVU.MOREX.r2.7HG0598850	0.743869	Uroporphyrinogen decarboxylase	Cysteine sulfinate desulfinase/cysteine desulfurase and related enzymes
HORVU.MOREX.r2.3HG0242580	HORVU.MOREX.r2.7HG0603270	0.217854	Lipoyl synthase	HKT23 transporter
HORVU.MOREX.r2.5HG0371640	HORVU.MOREX.r2.7HG0603270	0.193151	Cornichon protein, expressed	HKT23 transporter
HORVU.MOREX.r2.1HG0043590	HORVU.MOREX.r2.7HG0603270	0.141384	Methylsterol monooxygenase 1-2	HKT23 transporter
HORVU.MOREX.r2.7HG0567790	HORVU.MOREX.r2.7HG0603270	0.173163	Serine/threonine-protein kinase RIO1	HKT23 transporter
HORVU.MOREX.r2.4HG0287810	HORVU.MOREX.r2.7HG0610080	0.22965	Receptor protein kinase, putative	Alpha/beta-Hydrolases superfamily protein
HORVU.MOREX.r2.3HG0248400	HORVU.MOREX.r2.7HG0610080	0.468689	Leucine-rich repeat receptor-like protein kinase	Alpha/beta-Hydrolases superfamily protein
HORVU.MOREX.r2.6HG0469030	HORVU.MOREX.r2.3HG0236950	0.390651	Polyubiquitin protein	Serine acetyltransferase
HORVU.MOREX.r2.7HG0608370	HORVU.MOREX.r2.3HG0236950	0.282492	Polyubiquitin	Serine acetyltransferase
HORVU.MOREX.r2.3HG0236950	HORVU.MOREX.r2.3HG0236950	1	Serine acetyltransferase	Serine acetyltransferase
HORVU.MOREX.r2.6HG0503500	HORVU.MOREX.r2.3HG0236950	0.335624	9-cis epoxycarotenoid dioxygenase	Serine acetyltransferase
HORVU.MOREX.r2.6HG0469000	HORVU.MOREX.r2.3HG0236950	0.438111	Polyubiquitin	Serine acetyltransferase
HORVU.MOREX.r2.3HG0191720	HORVU.MOREX.r2.7HG0618510	0.682558	Chaperone protein DnaJ	Ubiquitin system component Cue protein, putative
HORVU.MOREX.r2.5HG0434470	HORVU.MOREX.r2.7HG0618510	0.620675	Photosystem I reaction center subunit II	Ubiquitin system component Cue protein, putative
HORVU.MOREX.r2.3HG0215210	HORVU.MOREX.r2.7HG0618500	0.254215	WD40 repeat-containing protein	Phox (PX) domain-containing protein
HORVU.MOREX.r2.6HG0462750	HORVU.MOREX.r2.7HG0618500	0.239248	Protein arginine N-methyltransferase	Phox (PX) domain-containing protein
HORVU.MOREX.r2.7HG0552920	HORVU.MOREX.r2.7HG0618500	0.309494	Exosome complex component rrp4	Phox (PX) domain-containing protein
HORVU.MOREX.r2.6HG0469320	HORVU.MOREX.r2.7HG0618500	0.148854	Exosome complex component rrp4	Phox (PX) domain-containing protein
HORVU.MOREX.r2.5HG0446060	HORVU.MOREX.r2.7HG0618500	0.429082	Polyribonucleotide nucleotidyltransferase	Phox (PX) domain-containing protein
HORVU.MOREX.r2.1HG0071030	HORVU.MOREX.r2.7HG0618500	0.291532	Ribonuclease PH	Phox (PX) domain-containing protein
HORVU.MOREX.r2.7HG0581760	HORVU.MOREX.r2.7HG0618500	0.332691	Exosome complex component	Phox (PX) domain-containing protein
HORVU.MOREX.r2.5HG0419110	HORVU.MOREX.r2.7HG0618500	0.312605	Exosome complex component CSL4	Phox (PX) domain-containing protein
HORVU.MOREX.r2.4HG0334130	HORVU.MOREX.r2.7HG0618500	0.465917	3'-5' exonuclease domain-containing family protein	Phox (PX) domain-containing protein
HORVU.MOREX.r2.7HG0609270	HORVU.MOREX.r2.7HG0618500	0.353592	Exosome complex component	Phox (PX) domain-containing protein
HORVU.MOREX.r2.4HG0285380	HORVU.MOREX.r2.7HG0618500	0.385201	Exosome complex component	Phox (PX) domain-containing protein
HORVU.MOREX.r2.1HG0077910	HORVU.MOREX.r2.7HG0618500	0.334102	DNA damage-binding protein 1	Phox (PX) domain-containing protein
HORVU.MOREX.r2.3HG0222430	HORVU.MOREX.r2.7HG0618500	0.381627	DNA damage-binding protein 1	Phox (PX) domain-containing protein
HORVU.MOREX.r2.6HG0470060	HORVU.MOREX.r2.7HG0618500	0.406391	Exosome complex component	Phox (PX) domain-containing protein
HORVU.MOREX.r2.7HG0557480	HORVU.MOREX.r2.7HG0618500	0.372627	Kanadaptin	Phox (PX) domain-containing protein
HORVU.MOREX.r2.1HG0055530	HORVU.MOREX.r2.7HG0618500	0.237526	Transcription elongation factor SPT6	Phox (PX) domain-containing protein
HORVU.MOREX.r2.4HG0279970	HORVU.MOREX.r2.7HG0618580	0.886527	Pescadillo homolog	Protein mak16
HORVU.MOREX.r2.1HG0035670	HORVU.MOREX.r2.7HG0618580	0.834425	Nucleolar complex protein 2	Protein mak16
HORVU.MOREX.r2.5HG0354740	HORVU.MOREX.r2.7HG0618580	0.872857	60S ribosomal protein L24	Protein mak16
HORVU.MOREX.r2.7HG0588940	HORVU.MOREX.r2.7HG0618580	0.865569	U3 small nucleolar RNA-associated protein 14	Protein mak16
HORVU.MOREX.r2.2HG0159660	HORVU.MOREX.r2.7HG0618580	0.429956	DNA ligase	Protein mak16
HORVU.MOREX.r2.2HG0173950	HORVU.MOREX.r2.7HG0618580	0.838458	Bystin	Protein mak16
HORVU.MOREX.r2.5HG0369750	HORVU.MOREX.r2.7HG0618580	0.88212	Nucleolar complex 3-like protein	Protein mak16
HORVU.MOREX.r2.4HG0312690	HORVU.MOREX.r2.7HG0618580	0.88223	Peter Pan-like protein	Protein mak16
HORVU.MOREX.r2.5HG0446800	HORVU.MOREX.r2.7HG0618580	0.396396	Exportin-1	Protein mak16
HORVU.MOREX.r2.7HG0538080	HORVU.MOREX.r2.7HG0618580	0.659634	Ribosome production factor 1	Protein mak16
HORVU.MOREX.r2.3HG0236190	HORVU.MOREX.r2.7HG0618580	0.831733	KRR1 small subunit processome component	Protein mak16
HORVU.MOREX.r2.5HG0397940	HORVU.MOREX.r2.7HG0618580	0.915243	Ribosome production factor 2-like protein	Protein mak16
HORVU.MOREX.r2.2HG0143420	HORVU.MOREX.r2.7HG0621270	NA	14-3-3 protein	Thiosulfate sulfurtransferase GlpE
HORVU.MOREX.r2.4HG0281090	HORVU.MOREX.r2.7HG0621270	NA	14-3-3 protein	Thiosulfate sulfurtransferase GlpE
HORVU.MOREX.r2.4HG0280720	HORVU.MOREX.r2.7HG0621270	NA	GAI-like protein 1	Thiosulfate sulfurtransferase GlpE
HORVU.MOREX.r2.4HG0311100	HORVU.MOREX.r2.7HG0621270	NA	14-3-3 protein	Thiosulfate sulfurtransferase GlpE
HORVU.MOREX.r2.2HG0090820	HORVU.MOREX.r2.7HG0621270	NA	SNF1-related protein kinase regulatory subunit beta-1	Thiosulfate sulfurtransferase GlpE
HORVU.MOREX.r2.1HG0056070	HORVU.MOREX.r2.7HG0621270	NA	SNF1-related protein kinase regulatory subunit beta-1	Thiosulfate sulfurtransferase GlpE
HORVU.MOREX.r2.2HG0143420	HORVU.MOREX.r2.7HG0621290	0.287093	14-3-3 protein	Thiosulfate sulfurtransferase GlpE
HORVU.MOREX.r2.4HG0281090	HORVU.MOREX.r2.7HG0621290	0.501594	14-3-3 protein	Thiosulfate sulfurtransferase GlpE
HORVU.MOREX.r2.4HG0311100	HORVU.MOREX.r2.7HG0621290	0.305186	14-3-3 protein	Thiosulfate sulfurtransferase GlpE
HORVU.MOREX.r2.4HG0280720	HORVU.MOREX.r2.7HG0621290	0.511296	GAI-like protein 1	Thiosulfate sulfurtransferase GlpE
HORVU.MOREX.r2.1HG0056070	HORVU.MOREX.r2.7HG0621290	0.301244	SNF1-related protein kinase regulatory subunit beta-1	Thiosulfate sulfurtransferase GlpE
HORVU.MOREX.r2.2HG0090820	HORVU.MOREX.r2.7HG0621290	NA	SNF1-related protein kinase regulatory subunit beta-1	Thiosulfate sulfurtransferase GlpE
HORVU.MOREX.r2.6HG0497960	HORVU.MOREX.r2.6HG0497960	1	Cationic amino acid transporter, putative	Cationic amino acid transporter, putative
HORVU.MOREX.r2.4HG0303230	HORVU.MOREX.r2.6HG0497960	0.465401	Sodium/hydrogen exchanger	Cationic amino acid transporter, putative
HORVU.MOREX.r2.6HG0490320	HORVU.MOREX.r2.6HG0497960	0.67919	26S proteasome non-atpase regulatory subunit, putative	Cationic amino acid transporter, putative
HORVU.MOREX.r2.5HG0356440	HORVU.MOREX.r2.6HG0497960	NA	Cationic amino acid transporter, putative	Cationic amino acid transporter, putative
HORVU.MOREX.r2.4HG0277180	HORVU.MOREX.r2.6HG0497960	0.336898	Protein kinase family protein	Cationic amino acid transporter, putative
HORVU.MOREX.r2.2HG0094680	HORVU.MOREX.r2.6HG0497960	0.380746	Sodium/hydrogen exchanger	Cationic amino acid transporter, putative
HORVU.MOREX.r2.2HG0110730	HORVU.MOREX.r2.6HG0497960	0.285953	Protein DETOXIFICATION	Cationic amino acid transporter, putative
HORVU.MOREX.r2.2HG0127000	HORVU.MOREX.r2.6HG0497960	0.311526	Amino acid permease	Cationic amino acid transporter, putative
HORVU.MOREX.r2.1HG0003480	HORVU.MOREX.r2.6HG0497960	0.656154	Pumilio-like protein	Cationic amino acid transporter, putative
HORVU.MOREX.r2.1HG0069800	HORVU.MOREX.r2.6HG0497960	0.449259	Protein DETOXIFICATION	Cationic amino acid transporter, putative
HORVU.MOREX.r2.5HG0422250	HORVU.MOREX.r2.6HG0497960	0.383773	Cationic amino acid transporter, putative	Cationic amino acid transporter, putative
HORVU.MOREX.r2.2HG0161350	HORVU.MOREX.r2.6HG0497960	0.28382	26S proteasome regulatory subunit family protein	Cationic amino acid transporter, putative
HORVU.MOREX.r2.1HG0016720	HORVU.MOREX.r2.6HG0497960	0.23101	Sodium/hydrogen exchanger	Cationic amino acid transporter, putative
HORVU.MOREX.r2.7HG0532760	HORVU.MOREX.r2.6HG0497960	0.475226	Guanine nucleotide-binding protein subunit alpha-like protein	Cationic amino acid transporter, putative
HORVU.MOREX.r2.4HG0302460	HORVU.MOREX.r2.6HG0497960	0.454514	Magnesium/proton exchanger family member	Cationic amino acid transporter, putative
HORVU.MOREX.r2.7HG0549250	HORVU.MOREX.r2.1HG0056980	0.515734	Auxin response factor	Acetyltransferase
HORVU.MOREX.r2.6HG0497190	HORVU.MOREX.r2.1HG0056980	0.733837	Protein kinase	Acetyltransferase
HORVU.MOREX.r2.7HG0608370	HORVU.MOREX.r2.6HG0501260	0.654975	Polyubiquitin	Germin-like protein
HORVU.MOREX.r2.3HG0232920	HORVU.MOREX.r2.6HG0501260	0.225449	Guanine nucleotide-binding protein beta subunit-like protein	Germin-like protein
HORVU.MOREX.r2.6HG0469000	HORVU.MOREX.r2.6HG0501260	0.414185	Polyubiquitin	Germin-like protein
HORVU.MOREX.r2.6HG0469030	HORVU.MOREX.r2.6HG0501260	0.356744	Polyubiquitin protein	Germin-like protein
HORVU.MOREX.r2.1HG0069340	HORVU.MOREX.r2.6HG0501260	0.3245	Guanine nucleotide-binding protein subunit beta-1	Germin-like protein
HORVU.MOREX.r2.7HG0619420	HORVU.MOREX.r2.1HG0055850	NA	Chaperone protein htpG family protein	UDP-glycosyltransferase
HORVU.MOREX.r2.4HG0317940	HORVU.MOREX.r2.6HG0466040	NA	Nicotianamine synthase	COP9 signalosome complex subunit 5
HORVU.MOREX.r2.5HG0422820	HORVU.MOREX.r2.6HG0466040	NA	Auxin-responsive protein	COP9 signalosome complex subunit 5
HORVU.MOREX.r2.3HG0232920	HORVU.MOREX.r2.6HG0466040	NA	Guanine nucleotide-binding protein beta subunit-like protein	COP9 signalosome complex subunit 5
HORVU.MOREX.r2.1HG0020240	HORVU.MOREX.r2.6HG0466040	NA	Transcription initiation factor TFIID subunit 13	COP9 signalosome complex subunit 5
HORVU.MOREX.r2.1HG0039980	HORVU.MOREX.r2.6HG0466040	NA	COP9 signalosome complex subunit 1	COP9 signalosome complex subunit 5
HORVU.MOREX.r2.1HG0046830	HORVU.MOREX.r2.6HG0466040	NA	AP-3 complex subunit mu	COP9 signalosome complex subunit 5
HORVU.MOREX.r2.7HG0612400	HORVU.MOREX.r2.6HG0466040	NA	Aberrant panicle organization 1 protein	COP9 signalosome complex subunit 5
HORVU.MOREX.r2.4HG0344850	HORVU.MOREX.r2.6HG0466040	NA	COP9 signalosome complex subunit 1	COP9 signalosome complex subunit 5
HORVU.MOREX.r2.6HG0510060	HORVU.MOREX.r2.6HG0466040	NA	Cullin family protein	COP9 signalosome complex subunit 5
HORVU.MOREX.r2.3HG0214110	HORVU.MOREX.r2.6HG0466040	NA	COP9 signalosome complex subunit 2	COP9 signalosome complex subunit 5
HORVU.MOREX.r2.3HG0226610	HORVU.MOREX.r2.6HG0466040	NA	Late embryogenesis abundant protein Lea14	COP9 signalosome complex subunit 5
HORVU.MOREX.r2.2HG0171240	HORVU.MOREX.r2.6HG0466040	NA	Cullin family protein	COP9 signalosome complex subunit 5
HORVU.MOREX.r2.1HG0052160	HORVU.MOREX.r2.6HG0466040	NA	Cytochrome c	COP9 signalosome complex subunit 5
HORVU.MOREX.r2.7HG0532760	HORVU.MOREX.r2.6HG0466040	NA	Guanine nucleotide-binding protein subunit alpha-like protein	COP9 signalosome complex subunit 5
HORVU.MOREX.r2.3HG0256400	HORVU.MOREX.r2.6HG0466040	NA	Cytochrome c	COP9 signalosome complex subunit 5
HORVU.MOREX.r2.7HG0584040	HORVU.MOREX.r2.6HG0466040	NA	COP9 signalosome complex subunit 3	COP9 signalosome complex subunit 5
HORVU.MOREX.r2.2HG0090280	HORVU.MOREX.r2.6HG0466040	NA	Nicotianamine synthase	COP9 signalosome complex subunit 5
HORVU.MOREX.r2.5HG0423400	HORVU.MOREX.r2.6HG0466040	NA	Auxin-responsive protein	COP9 signalosome complex subunit 5
HORVU.MOREX.r2.4HG0317950	HORVU.MOREX.r2.6HG0466040	NA	Nicotianamine synthase	COP9 signalosome complex subunit 5
HORVU.MOREX.r2.5HG0360110	HORVU.MOREX.r2.6HG0466040	NA	Auxin-responsive protein	COP9 signalosome complex subunit 5
HORVU.MOREX.r2.3HG0206050	HORVU.MOREX.r2.6HG0466040	NA	Late embryogenesis abundant protein Lea14	COP9 signalosome complex subunit 5
HORVU.MOREX.r2.6HG0469000	HORVU.MOREX.r2.6HG0466040	NA	Polyubiquitin	COP9 signalosome complex subunit 5
HORVU.MOREX.r2.4HG0311100	HORVU.MOREX.r2.6HG0466040	NA	14-3-3 protein	COP9 signalosome complex subunit 5
HORVU.MOREX.r2.2HG0132970	HORVU.MOREX.r2.6HG0466040	NA	Eukaryotic translation initiation factor 3 subunit H	COP9 signalosome complex subunit 5
HORVU.MOREX.r2.6HG0520370	HORVU.MOREX.r2.6HG0466040	NA	Proliferating cell nuclear antigen	COP9 signalosome complex subunit 5
HORVU.MOREX.r2.6HG0521950	HORVU.MOREX.r2.6HG0466040	NA	Nicotianamine synthase	COP9 signalosome complex subunit 5
HORVU.MOREX.r2.2HG0149270	HORVU.MOREX.r2.6HG0466040	NA	Proliferating cell nuclear antigen	COP9 signalosome complex subunit 5
HORVU.MOREX.r2.7HG0608370	HORVU.MOREX.r2.6HG0466040	NA	Polyubiquitin	COP9 signalosome complex subunit 5
HORVU.MOREX.r2.7HG0562200	HORVU.MOREX.r2.6HG0466040	NA	Eukaryotic translation initiation factor 3 subunit F	COP9 signalosome complex subunit 5
HORVU.MOREX.r2.2HG0082280	HORVU.MOREX.r2.6HG0466040	NA	Nicotianamine synthase	COP9 signalosome complex subunit 5
HORVU.MOREX.r2.2HG0143420	HORVU.MOREX.r2.6HG0466040	NA	14-3-3 protein	COP9 signalosome complex subunit 5
HORVU.MOREX.r2.2HG0180010	HORVU.MOREX.r2.6HG0466040	NA	DDB1-and CUL4-associated factor-like protein 1	COP9 signalosome complex subunit 5
HORVU.MOREX.r2.4HG0281090	HORVU.MOREX.r2.6HG0466040	NA	14-3-3 protein	COP9 signalosome complex subunit 5
HORVU.MOREX.r2.4HG0332480	HORVU.MOREX.r2.6HG0466040	NA	COP9 signalosome complex subunit 4	COP9 signalosome complex subunit 5
HORVU.MOREX.r2.1HG0069340	HORVU.MOREX.r2.6HG0466040	NA	Guanine nucleotide-binding protein subunit beta-1	COP9 signalosome complex subunit 5
HORVU.MOREX.r2.1HG0076430	HORVU.MOREX.r2.6HG0466040	NA	Late embryogenesis abundant protein Lea14	COP9 signalosome complex subunit 5
HORVU.MOREX.r2.6HG0474050	HORVU.MOREX.r2.6HG0466040	NA	Nicotianamine synthase	COP9 signalosome complex subunit 5
HORVU.MOREX.r2.3HG0252010	HORVU.MOREX.r2.6HG0466040	NA	Mannose-1-phosphate guanyltransferase 1	COP9 signalosome complex subunit 5
HORVU.MOREX.r2.6HG0469030	HORVU.MOREX.r2.6HG0466040	NA	Polyubiquitin protein	COP9 signalosome complex subunit 5
HORVU.MOREX.r2.5HG0390850	HORVU.MOREX.r2.6HG0498460	0.134966	Myb family transcription factor APL	Sulfotransferase
HORVU.MOREX.r2.6HG0469000	HORVU.MOREX.r2.6HG0498460	0.172442	Polyubiquitin	Sulfotransferase
HORVU.MOREX.r2.6HG0469030	HORVU.MOREX.r2.6HG0498460	0.13694	Polyubiquitin protein	Sulfotransferase
HORVU.MOREX.r2.7HG0608370	HORVU.MOREX.r2.6HG0498460	0.113101	Polyubiquitin	Sulfotransferase
HORVU.MOREX.r2.6HG0469000	HORVU.MOREX.r2.6HG0502340	0.276747	Polyubiquitin	Oligopeptide transporter, putative
HORVU.MOREX.r2.7HG0608370	HORVU.MOREX.r2.6HG0502340	0.38108	Polyubiquitin	Oligopeptide transporter, putative
HORVU.MOREX.r2.6HG0469030	HORVU.MOREX.r2.6HG0502340	0.188208	Polyubiquitin protein	Oligopeptide transporter, putative
HORVU.MOREX.r2.1HG0042520	HORVU.MOREX.r2.1HG0055870	0.67601	E2 ubiquitin-conjugating-like enzyme	Cyclin
HORVU.MOREX.r2.1HG0027750	HORVU.MOREX.r2.1HG0055870	0.399633	Histone acetyltransferase GCN5	Cyclin
HORVU.MOREX.r2.4HG0344580	HORVU.MOREX.r2.1HG0055870	0.607156	Protein kinase	Cyclin
HORVU.MOREX.r2.4HG0343670	HORVU.MOREX.r2.1HG0055870	0.222442	E2 ubiquitin-conjugating-like enzyme	Cyclin
HORVU.MOREX.r2.6HG0457700	HORVU.MOREX.r2.1HG0055870	0.429585	Protein kinase	Cyclin
HORVU.MOREX.r2.1HG0051370	HORVU.MOREX.r2.1HG0055870	0.54554	Protein kinase-like protein	Cyclin
HORVU.MOREX.r2.4HG0319150	HORVU.MOREX.r2.1HG0055890	0.373075	26S protease regulatory subunit	Tubulin beta chain
HORVU.MOREX.r2.6HG0469030	HORVU.MOREX.r2.1HG0055890	0.362074	Polyubiquitin protein	Tubulin beta chain
HORVU.MOREX.r2.7HG0608370	HORVU.MOREX.r2.1HG0055890	0.489043	Polyubiquitin	Tubulin beta chain
HORVU.MOREX.r2.4HG0343210	HORVU.MOREX.r2.1HG0055890	0.336703	Cysteine-rich repeat secretory protein	Tubulin beta chain
HORVU.MOREX.r2.6HG0469000	HORVU.MOREX.r2.1HG0055890	0.346512	Polyubiquitin	Tubulin beta chain
HORVU.MOREX.r2.4HG0347300	HORVU.MOREX.r2.6HG0501060	0.584622	Mitochondrial import inner membrane translocase subunit tim23	Mitochondrial import inner membrane translocase subunit
HORVU.MOREX.r2.7HG0568440	HORVU.MOREX.r2.6HG0501060	0.764743	Mitochondrial import inner membrane translocase subunit	Mitochondrial import inner membrane translocase subunit
HORVU.MOREX.r2.5HG0375720	HORVU.MOREX.r2.6HG0501060	0.498393	Exocyst complex component Sec10-related family protein	Mitochondrial import inner membrane translocase subunit
HORVU.MOREX.r2.5HG0438880	HORVU.MOREX.r2.6HG0501060	0.87467	Mitochondrial import inner membrane translocase subunit	Mitochondrial import inner membrane translocase subunit
HORVU.MOREX.r2.7HG0608370	HORVU.MOREX.r2.1HG0053790	0.412549	Polyubiquitin	Sulfite reductase [NADPH] hemoprotein beta-component
HORVU.MOREX.r2.6HG0469030	HORVU.MOREX.r2.1HG0053790	0.339394	Polyubiquitin protein	Sulfite reductase [NADPH] hemoprotein beta-component
HORVU.MOREX.r2.6HG0469000	HORVU.MOREX.r2.1HG0053790	0.401916	Polyubiquitin	Sulfite reductase [NADPH] hemoprotein beta-component
HORVU.MOREX.r2.5HG0428870	HORVU.MOREX.r2.1HG0053940	0.854882	AP-1 complex subunit sigma-1	1-acyl-sn-glycerol-3-phosphate acyltransferase
HORVU.MOREX.r2.4HG0277520	HORVU.MOREX.r2.1HG0053940	0.448907	HSP20-like chaperone superfamily protein	1-acyl-sn-glycerol-3-phosphate acyltransferase
HORVU.MOREX.r2.2HG0119820	HORVU.MOREX.r2.1HG0053940	0.257582	ATP-dependent DNA helicase	1-acyl-sn-glycerol-3-phosphate acyltransferase
HORVU.MOREX.r2.6HG0464080	HORVU.MOREX.r2.6HG0501530	0.368739	26S proteasome non-ATPase regulatory subunit-like protein	UPF0160 protein MYG1, mitochondrial
HORVU.MOREX.r2.3HG0183620	HORVU.MOREX.r2.6HG0501530	NA	Dipeptidyl peptidase family member 6	UPF0160 protein MYG1, mitochondrial
HORVU.MOREX.r2.6HG0495400	HORVU.MOREX.r2.6HG0501530	0.213183	NAD(P)H-hydrate epimerase	UPF0160 protein MYG1, mitochondrial
HORVU.MOREX.r2.6HG0480450	HORVU.MOREX.r2.6HG0501530	0.753057	Aminopeptidase	UPF0160 protein MYG1, mitochondrial
HORVU.MOREX.r2.3HG0258670	HORVU.MOREX.r2.6HG0501530	0.349883	Small ubiquitin-related modifier	UPF0160 protein MYG1, mitochondrial
HORVU.MOREX.r2.4HG0326700	HORVU.MOREX.r2.6HG0501530	0.397602	26S proteasome non-ATPase regulatory subunit 4	UPF0160 protein MYG1, mitochondrial
HORVU.MOREX.r2.7HG0550950	HORVU.MOREX.r2.6HG0501530	0.323714	Dipeptidyl peptidase family member 6	UPF0160 protein MYG1, mitochondrial
HORVU.MOREX.r2.6HG0501530	HORVU.MOREX.r2.6HG0501530	1	UPF0160 protein MYG1, mitochondrial	UPF0160 protein MYG1, mitochondrial
HORVU.MOREX.r2.1HG0003480	HORVU.MOREX.r2.6HG0501530	0.799816	Pumilio-like protein	UPF0160 protein MYG1, mitochondrial
HORVU.MOREX.r2.4HG0336370	HORVU.MOREX.r2.6HG0501530	0.874207	Adenylosuccinate synthetase	UPF0160 protein MYG1, mitochondrial
HORVU.MOREX.r2.7HG0550890	HORVU.MOREX.r2.6HG0501530	0.660171	Dipeptidyl peptidase family member 6	UPF0160 protein MYG1, mitochondrial
HORVU.MOREX.r2.7HG0549020	HORVU.MOREX.r2.5HG0419700	0.930312	Nucleolar GTP-binding protein 1	Ribosome biogenesis protein BOP1 homolog
HORVU.MOREX.r2.5HG0354740	HORVU.MOREX.r2.5HG0419700	0.882184	60S ribosomal protein L24	Ribosome biogenesis protein BOP1 homolog
HORVU.MOREX.r2.2HG0165560	HORVU.MOREX.r2.5HG0419700	0.94154	Protein SDA1-like protein	Ribosome biogenesis protein BOP1 homolog
HORVU.MOREX.r2.2HG0093330	HORVU.MOREX.r2.5HG0419700	0.749903	Ribosomal protein S8e/ribosomal biogenesis NSA2	Ribosome biogenesis protein BOP1 homolog
HORVU.MOREX.r2.7HG0619910	HORVU.MOREX.r2.5HG0419700	0.887041	WD40 repeat-like protein	Ribosome biogenesis protein BOP1 homolog
HORVU.MOREX.r2.6HG0488970	HORVU.MOREX.r2.5HG0419700	0.862132	Ribosome biogenesis protein BRX1-like protein	Ribosome biogenesis protein BOP1 homolog
HORVU.MOREX.r2.2HG0095700	HORVU.MOREX.r2.5HG0419700	0.946081	Ubiquitin carboxyl-terminal hydrolase	Ribosome biogenesis protein BOP1 homolog
HORVU.MOREX.r2.4HG0312690	HORVU.MOREX.r2.5HG0419700	0.914911	Peter Pan-like protein	Ribosome biogenesis protein BOP1 homolog
HORVU.MOREX.r2.3HG0236190	HORVU.MOREX.r2.5HG0419700	0.77194	KRR1 small subunit processome component	Ribosome biogenesis protein BOP1 homolog
HORVU.MOREX.r2.4HG0314300	HORVU.MOREX.r2.5HG0419700	0.885515	Nucleolar GTP-binding protein 2	Ribosome biogenesis protein BOP1 homolog
HORVU.MOREX.r2.1HG0003480	HORVU.MOREX.r2.5HG0419700	0.780684	Pumilio-like protein	Ribosome biogenesis protein BOP1 homolog
HORVU.MOREX.r2.5HG0374940	HORVU.MOREX.r2.5HG0419700	0.157766	E3 ubiquitin-protein ligase	Ribosome biogenesis protein BOP1 homolog
HORVU.MOREX.r2.2HG0173950	HORVU.MOREX.r2.5HG0419700	0.909098	Bystin	Ribosome biogenesis protein BOP1 homolog
HORVU.MOREX.r2.5HG0411320	HORVU.MOREX.r2.5HG0419700	0.806357	ATP-dependent zinc metalloprotease FtsH	Ribosome biogenesis protein BOP1 homolog
HORVU.MOREX.r2.2HG0094430	HORVU.MOREX.r2.5HG0419700	0.953858	Nucleolar protein	Ribosome biogenesis protein BOP1 homolog
HORVU.MOREX.r2.6HG0507260	HORVU.MOREX.r2.5HG0419700	0.901536	H/ACA ribonucleoprotein complex subunit 2-like protein	Ribosome biogenesis protein BOP1 homolog
HORVU.MOREX.r2.7HG0571860	HORVU.MOREX.r2.5HG0419700	0.508775	Myotubularin	Ribosome biogenesis protein BOP1 homolog
HORVU.MOREX.r2.1HG0035670	HORVU.MOREX.r2.5HG0419700	0.86859	Nucleolar complex protein 2	Ribosome biogenesis protein BOP1 homolog
HORVU.MOREX.r2.5HG0446800	HORVU.MOREX.r2.5HG0419700	0.382051	Exportin-1	Ribosome biogenesis protein BOP1 homolog
HORVU.MOREX.r2.1HG0027750	HORVU.MOREX.r2.5HG0419700	0.270238	Histone acetyltransferase GCN5	Ribosome biogenesis protein BOP1 homolog
HORVU.MOREX.r2.5HG0439890	HORVU.MOREX.r2.5HG0419700	0.938177	Pumilio	Ribosome biogenesis protein BOP1 homolog
HORVU.MOREX.r2.4HG0279970	HORVU.MOREX.r2.5HG0419700	0.876531	Pescadillo homolog	Ribosome biogenesis protein BOP1 homolog
HORVU.MOREX.r2.5HG0419700	HORVU.MOREX.r2.5HG0419700	1	Ribosome biogenesis protein BOP1 homolog	Ribosome biogenesis protein BOP1 homolog
HORVU.MOREX.r2.1HG0011220	HORVU.MOREX.r2.5HG0419700	0.961408	Polyribonucleotide nucleotidyltransferase	Ribosome biogenesis protein BOP1 homolog
HORVU.MOREX.r2.6HG0506700	HORVU.MOREX.r2.5HG0419700	0.969878	Ribosomal RNA small subunit methyltransferase b	Ribosome biogenesis protein BOP1 homolog
HORVU.MOREX.r2.7HG0616150	HORVU.MOREX.r2.5HG0419700	0.255768	Transducin/WD40 repeat protein	Ribosome biogenesis protein BOP1 homolog
HORVU.MOREX.r2.6HG0513890	HORVU.MOREX.r2.5HG0419700	0.572209	THO complex subunit 5	Ribosome biogenesis protein BOP1 homolog
HORVU.MOREX.r2.6HG0490110	HORVU.MOREX.r2.5HG0419700	0.937172	CCAAT/enhancer-binding protein zeta	Ribosome biogenesis protein BOP1 homolog
HORVU.MOREX.r2.6HG0457760	HORVU.MOREX.r2.5HG0419700	0.837177	pumilio 9	Ribosome biogenesis protein BOP1 homolog
HORVU.MOREX.r2.6HG0458380	HORVU.MOREX.r2.5HG0419700	0.239206	THO complex subunit 7	Ribosome biogenesis protein BOP1 homolog
HORVU.MOREX.r2.3HG0266680	HORVU.MOREX.r2.5HG0419700	0.32765	Crossover junction endonuclease mus81	Ribosome biogenesis protein BOP1 homolog
HORVU.MOREX.r2.7HG0538000	HORVU.MOREX.r2.5HG0419700	0.256557	Kinase family protein	Ribosome biogenesis protein BOP1 homolog
HORVU.MOREX.r2.5HG0382520	HORVU.MOREX.r2.5HG0419700	0.565643	Dual specificity protein phosphatase, putative	Ribosome biogenesis protein BOP1 homolog
HORVU.MOREX.r2.2HG0098990	HORVU.MOREX.r2.5HG0419700	0.806097	Eukaryotic translation initiation factor 6	Ribosome biogenesis protein BOP1 homolog
HORVU.MOREX.r2.7HG0588940	HORVU.MOREX.r2.5HG0419700	0.889565	U3 small nucleolar RNA-associated protein 14	Ribosome biogenesis protein BOP1 homolog
HORVU.MOREX.r2.2HG0128840	HORVU.MOREX.r2.3HG0200740	0.317533	Protein kinase	DUF4050 family protein
HORVU.MOREX.r2.3HG0224180	HORVU.MOREX.r2.2HG0180900	0.2197	Ubiquitin-related family protein	Fatty acid hydroxylase superfamily protein
HORVU.MOREX.r2.6HG0521790	HORVU.MOREX.r2.2HG0180900	0.208928	Fatty acid hydroxylase superfamily protein	Fatty acid hydroxylase superfamily protein
HORVU.MOREX.r2.2HG0180900	HORVU.MOREX.r2.2HG0180900	1	Fatty acid hydroxylase superfamily protein	Fatty acid hydroxylase superfamily protein
HORVU.MOREX.r2.2HG0149970	HORVU.MOREX.r2.2HG0180900	NA	Fatty acid hydroxylase superfamily protein	Fatty acid hydroxylase superfamily protein
HORVU.MOREX.r2.7HG0541300	HORVU.MOREX.r2.2HG0180900	NA	Fatty acid hydroxylase superfamily protein	Fatty acid hydroxylase superfamily protein
HORVU.MOREX.r2.2HG0150000	HORVU.MOREX.r2.2HG0180900	NA	Fatty acid hydroxylase superfamily protein	Fatty acid hydroxylase superfamily protein
HORVU.MOREX.r2.6HG0493720	HORVU.MOREX.r2.2HG0180900	0.397493	Fatty acid hydroxylase superfamily protein	Fatty acid hydroxylase superfamily protein
HORVU.MOREX.r2.1HG0032450	HORVU.MOREX.r2.2HG0180900	0.513801	Fatty acid hydroxylase superfamily	Fatty acid hydroxylase superfamily protein
HORVU.MOREX.r2.4HG0282580	HORVU.MOREX.r2.2HG0090390	0.546171	Pre-mRNA polyadenylation factor Fip1	Poly(A) polymerase
HORVU.MOREX.r2.3HG0247870	HORVU.MOREX.r2.5HG0393300	0.396717	Methionine-tRNA ligase, putative	Proton pump interactor, putative
HORVU.MOREX.r2.2HG0168500	HORVU.MOREX.r2.5HG0393300	0.190874	Plasma membrane ATPase	Proton pump interactor, putative
HORVU.MOREX.r2.1HG0042520	HORVU.MOREX.r2.5HG0393300	0.165668	E2 ubiquitin-conjugating-like enzyme	Proton pump interactor, putative
HORVU.MOREX.r2.1HG0051870	HORVU.MOREX.r2.5HG0393300	0.235668	Plasma membrane ATPase	Proton pump interactor, putative
HORVU.MOREX.r2.3HG0224180	HORVU.MOREX.r2.5HG0393300	0.210161	Ubiquitin-related family protein	Proton pump interactor, putative
HORVU.MOREX.r2.4HG0343670	HORVU.MOREX.r2.5HG0393300	0.563147	E2 ubiquitin-conjugating-like enzyme	Proton pump interactor, putative
HORVU.MOREX.r2.1HG0075170	HORVU.MOREX.r2.7HG0624100	0.210766	Auxin efflux carrier component	Non specific phospholipase C
HORVU.MOREX.r2.3HG0228010	HORVU.MOREX.r2.7HG0624100	0.123741	Auxin efflux carrier component	Non specific phospholipase C
HORVU.MOREX.r2.4HG0331060	HORVU.MOREX.r2.7HG0624100	0.27685	Mannose-1-phosphate guanyltransferase	Non specific phospholipase C
HORVU.MOREX.r2.3HG0270740	HORVU.MOREX.r2.7HG0624100	0.198885	Auxin efflux carrier component	Non specific phospholipase C
HORVU.MOREX.r2.1HG0059860	HORVU.MOREX.r2.7HG0624100	NA	Auxin efflux carrier component	Non specific phospholipase C
HORVU.MOREX.r2.1HG0062380	HORVU.MOREX.r2.6HG0498140	NA	Nuclear pore complex protein NUP35	Aquaporin
HORVU.MOREX.r2.2HG0152570	HORVU.MOREX.r2.6HG0498140	NA	Vesicle-associated protein 1-1	Aquaporin
HORVU.MOREX.r2.3HG0202540	HORVU.MOREX.r2.6HG0498140	NA	Nuclear pore complex protein NUP35	Aquaporin
HORVU.MOREX.r2.3HG0239310	HORVU.MOREX.r2.6HG0498140	NA	Nuclear pore complex protein NUP35	Aquaporin
HORVU.MOREX.r2.1HG0018070	HORVU.MOREX.r2.6HG0498140	NA	Translocator protein-like protein	Aquaporin
HORVU.MOREX.r2.5HG0367380	HORVU.MOREX.r2.UnG0627720	0.286665	Pentatricopeptide repeat-containing protein, putative	Cytochrome b
HORVU.MOREX.r2.5HG0367380	HORVU.MOREX.r2.UnG0629360	0.286665	Pentatricopeptide repeat-containing protein, putative	Cytochrome b
HORVU.MOREX.r2.5HG0363110	HORVU.MOREX.r2.5HG0354910	0.18023	Calcium-transporting ATPase	Ureide permease-like protein
HORVU.MOREX.r2.4HG0331590	HORVU.MOREX.r2.5HG0354910	0.406342	Calcium-transporting ATPase	Ureide permease-like protein
HORVU.MOREX.r2.2HG0127000	HORVU.MOREX.r2.5HG0354910	0.519428	Amino acid permease	Ureide permease-like protein
HORVU.MOREX.r2.5HG0349330	HORVU.MOREX.r2.5HG0354910	0.536096	Sucrose transporter protein	Ureide permease-like protein
HORVU.MOREX.r2.4HG0286180	HORVU.MOREX.r2.5HG0354910	0.498888	Calcium-transporting ATPase	Ureide permease-like protein
HORVU.MOREX.r2.6HG0498140	HORVU.MOREX.r2.5HG0354910	NA	Aquaporin	Ureide permease-like protein
HORVU.MOREX.r2.5HG0399410	HORVU.MOREX.r2.6HG0454350	0.494907	Glutamate receptor	Glutamate receptor
HORVU.MOREX.r2.5HG0399400	HORVU.MOREX.r2.6HG0454350	0.360091	Glutamate receptor	Glutamate receptor
HORVU.MOREX.r2.5HG0399310	HORVU.MOREX.r2.6HG0454350	0.237234	Glutamate receptor	Glutamate receptor
HORVU.MOREX.r2.5HG0356360	HORVU.MOREX.r2.6HG0454350	0.48775	Glutamate receptor	Glutamate receptor
HORVU.MOREX.r2.6HG0516450	HORVU.MOREX.r2.6HG0454350	0.306432	Glutamate receptor	Glutamate receptor
HORVU.MOREX.r2.6HG0516400	HORVU.MOREX.r2.6HG0454350	0.432564	Glutamate receptor	Glutamate receptor
HORVU.MOREX.r2.7HG0547730	HORVU.MOREX.r2.6HG0454350	0.241605	Glutamate receptor	Glutamate receptor
HORVU.MOREX.r2.6HG0454350	HORVU.MOREX.r2.6HG0454350	1	Glutamate receptor	Glutamate receptor
HORVU.MOREX.r2.5HG0399300	HORVU.MOREX.r2.6HG0454350	0.335178	Glutamate receptor	Glutamate receptor
HORVU.MOREX.r2.5HG0399370	HORVU.MOREX.r2.6HG0454350	0.549796	Glutamate receptor	Glutamate receptor
HORVU.MOREX.r2.5HG0399420	HORVU.MOREX.r2.6HG0454350	0.114194	Glutamate receptor	Glutamate receptor
HORVU.MOREX.r2.2HG0162870	HORVU.MOREX.r2.6HG0454350	0.197356	Glutamate receptor	Glutamate receptor
HORVU.MOREX.r2.5HG0399360	HORVU.MOREX.r2.6HG0454350	0.582486	Glutamate receptor	Glutamate receptor
HORVU.MOREX.r2.4HG0333510	HORVU.MOREX.r2.6HG0485390	0.807644	Transcription factor	E2F transcription factor
HORVU.MOREX.r2.6HG0452230	HORVU.MOREX.r2.6HG0485390	0.504733	ATP-dependent helicase family protein	E2F transcription factor
HORVU.MOREX.r2.7HG0569030	HORVU.MOREX.r2.6HG0485390	0.651857	Retinoblastoma-related protein	E2F transcription factor
HORVU.MOREX.r2.6HG0457700	HORVU.MOREX.r2.6HG0485390	0.786447	Protein kinase	E2F transcription factor
HORVU.MOREX.r2.7HG0555590	HORVU.MOREX.r2.6HG0485390	0.187302	Chromatin remodeling protein-like	E2F transcription factor
HORVU.MOREX.r2.4HG0344580	HORVU.MOREX.r2.6HG0485390	0.484517	Protein kinase	E2F transcription factor
HORVU.MOREX.r2.5HG0377070	HORVU.MOREX.r2.6HG0485390	0.522739	SWI/SNF complex subunit SWI3C	E2F transcription factor
HORVU.MOREX.r2.4HG0289970	HORVU.MOREX.r2.6HG0485390	0.608296	SWI/SNF complex subunit SWI3C	E2F transcription factor
HORVU.MOREX.r2.1HG0051370	HORVU.MOREX.r2.6HG0485390	0.648898	Protein kinase-like protein	E2F transcription factor
HORVU.MOREX.r2.4HG0308390	HORVU.MOREX.r2.6HG0485390	0.292593	Retinoblastoma-related protein	E2F transcription factor
HORVU.MOREX.r2.3HG0273090	HORVU.MOREX.r2.6HG0485390	0.324058	Cyclin family protein	E2F transcription factor
HORVU.MOREX.r2.6HG0458380	HORVU.MOREX.r2.5HG0446440	0.214537	THO complex subunit 7	ATP-dependent DNA helicase 2 subunit KU80
HORVU.MOREX.r2.6HG0489240	HORVU.MOREX.r2.5HG0446440	0.444829	Armadillo repeat-containing protein LFR	ATP-dependent DNA helicase 2 subunit KU80
HORVU.MOREX.r2.2HG0088730	HORVU.MOREX.r2.5HG0446440	0.786769	26S protease regulatory subunit	ATP-dependent DNA helicase 2 subunit KU80
HORVU.MOREX.r2.3HG0203270	HORVU.MOREX.r2.7HG0590960	0.49428	TPR repeat-containing thioredoxin TTL1	Protein kinase-like
HORVU.MOREX.r2.1HG0076940	HORVU.MOREX.r2.7HG0590960	0.647846	TPR repeat-containing thioredoxin TTL1	Protein kinase-like
HORVU.MOREX.r2.3HG0225160	HORVU.MOREX.r2.7HG0590960	0.673876	TPR repeat-containing thioredoxin TTL1	Protein kinase-like
HORVU.MOREX.r2.6HG0465890	HORVU.MOREX.r2.4HG0297010	0.429944	DNA-directed RNA polymerase subunit	DNA-directed RNA polymerase II, putative
HORVU.MOREX.r2.1HG0019570	HORVU.MOREX.r2.4HG0297010	0.317047	DNA-directed RNA polymerase subunit	DNA-directed RNA polymerase II, putative
HORVU.MOREX.r2.5HG0416670	HORVU.MOREX.r2.4HG0297010	0.164404	DNA repair protein-like protein	DNA-directed RNA polymerase II, putative
HORVU.MOREX.r2.2HG0106020	HORVU.MOREX.r2.4HG0297010	0.425763	DNA repair protein-like protein	DNA-directed RNA polymerase II, putative
HORVU.MOREX.r2.2HG0158350	HORVU.MOREX.r2.4HG0291050	0.388155	30S ribosomal protein S17	60S acidic ribosomal protein P0
HORVU.MOREX.r2.6HG0488990	HORVU.MOREX.r2.4HG0291050	0.387943	60S ribosomal protein L6	60S acidic ribosomal protein P0
HORVU.MOREX.r2.4HG0319150	HORVU.MOREX.r2.4HG0291050	0.191373	26S protease regulatory subunit	60S acidic ribosomal protein P0
HORVU.MOREX.r2.4HG0314500	HORVU.MOREX.r2.4HG0291050	0.354132	Ribosomal protein L19	60S acidic ribosomal protein P0
HORVU.MOREX.r2.1HG0026750	HORVU.MOREX.r2.4HG0291050	0.383741	40S ribosomal protein S3a	60S acidic ribosomal protein P0
HORVU.MOREX.r2.4HG0337450	HORVU.MOREX.r2.4HG0291050	0.12075	50S ribosomal protein L2	60S acidic ribosomal protein P0
HORVU.MOREX.r2.1HG0031760	HORVU.MOREX.r2.4HG0291050	0.355863	60S ribosomal protein L21	60S acidic ribosomal protein P0
HORVU.MOREX.r2.4HG0331970	HORVU.MOREX.r2.4HG0291050	0.366311	40S ribosomal protein S3a	60S acidic ribosomal protein P0
HORVU.MOREX.r2.2HG0092650	HORVU.MOREX.r2.4HG0291050	0.32141	Ribosomal protein L19	60S acidic ribosomal protein P0
HORVU.MOREX.r2.7HG0577670	HORVU.MOREX.r2.4HG0291050	0.325753	30S ribosomal protein S3	60S acidic ribosomal protein P0
HORVU.MOREX.r2.3HG0182620	HORVU.MOREX.r2.4HG0291050	0.349783	50S ribosomal protein L6	60S acidic ribosomal protein P0
HORVU.MOREX.r2.2HG0124730	HORVU.MOREX.r2.4HG0291050	NA	50S ribosomal protein L6	60S acidic ribosomal protein P0
HORVU.MOREX.r2.6HG0492210	HORVU.MOREX.r2.4HG0291050	0.3724	30S ribosomal protein S17	60S acidic ribosomal protein P0
HORVU.MOREX.r2.3HG0182650	HORVU.MOREX.r2.4HG0291050	0.419629	50S ribosomal protein L6	60S acidic ribosomal protein P0
HORVU.MOREX.r2.7HG0528960	HORVU.MOREX.r2.4HG0291050	0.381563	50S ribosomal protein L6	60S acidic ribosomal protein P0
HORVU.MOREX.r2.2HG0102110	HORVU.MOREX.r2.4HG0291050	0.366973	40S ribosomal protein S6	60S acidic ribosomal protein P0
HORVU.MOREX.r2.2HG0086170	HORVU.MOREX.r2.4HG0291050	0.403953	40S ribosomal protein S6	60S acidic ribosomal protein P0
HORVU.MOREX.r2.3HG0239930	HORVU.MOREX.r2.4HG0291050	0.103402	Leucine-rich repeat receptor-like protein kinase family	60S acidic ribosomal protein P0
HORVU.MOREX.r2.1HG0018910	HORVU.MOREX.r2.4HG0291050	0.33543	60S ribosomal protein L18-like protein	60S acidic ribosomal protein P0
HORVU.MOREX.r2.2HG0092790	HORVU.MOREX.r2.4HG0291050	0.401422	60S ribosomal protein L18	60S acidic ribosomal protein P0
HORVU.MOREX.r2.2HG0088730	HORVU.MOREX.r2.4HG0291050	0.367168	26S protease regulatory subunit	60S acidic ribosomal protein P0
HORVU.MOREX.r2.4HG0343460	HORVU.MOREX.r2.4HG0291050	0.363591	60S ribosomal protein L21	60S acidic ribosomal protein P0
[truncated: 64,150 more rows]

## Sheet: AtInt
Source	Target
AT1G57860	AT4G01310
AT1G09690	AT4G01310
AT1G09590	AT4G01310
AT1G57660	AT4G01310
AT1G09590	AT3G07110
AT1G09590	AT5G48760
AT1G09590	AT3G24830
AT1G09590	AT4G13170
AT1G09690	AT3G07110
AT1G09690	AT5G48760
AT1G09690	AT3G24830
AT1G09690	AT4G13170
AT1G57860	AT3G07110
AT1G57860	AT5G48760
AT1G57860	AT3G24830
AT1G57860	AT4G13170
AT1G57660	AT3G07110
AT1G57660	AT5G48760
AT1G57660	AT3G24830
AT1G57660	AT4G13170
AT1G57660	AT5G20290
AT1G57660	AT5G59240
AT1G57860	AT5G20290
AT1G57860	AT5G59240
AT1G09690	AT5G20290
AT1G09690	AT5G59240
AT1G09590	AT5G20290
AT1G09590	AT5G59240
AT4G01310	AT5G20290
AT4G01310	AT5G59240
AT5G42040	AT1G13060
AT5G42040	AT3G26340
AT1G64520	AT1G13060
AT1G64520	AT3G26340
AT5G20290	AT5G58290
AT5G59240	AT5G58290
AT1G13060	AT5G58290
AT5G42040	AT5G58290
AT1G64520	AT5G58290
AT3G26340	AT5G58290
AT5G58290	AT3G01890
AT5G58290	AT5G14170
AT5G19310	AT3G01890
AT5G19310	AT5G14170
AT3G06010	AT3G01890
AT3G06010	AT5G14170
AT5G42040	AT3G22320
AT5G42040	AT3G16680
AT3G01890	AT3G22320
AT3G01890	AT3G16680
AT5G14170	AT3G22320
AT5G14170	AT3G16680
AT1G64520	AT3G22320
AT1G64520	AT3G16680
AT4G35800	AT3G22320
AT4G35800	AT3G16680
AT3G54660	AT1G48850
AT3G24170	AT1G48850
AT3G21280	AT5G16240
AT3G21280	AT3G02630
AT3G21280	AT2G43710
AT1G51710	AT5G16240
AT1G51710	AT3G02630
AT1G51710	AT2G43710
AT5G36210	AT5G10540
AT5G36210	AT5G65620
AT5G58290	AT2G38770
AT3G16680	AT2G38770
AT3G01890	AT2G38770
AT3G22320	AT2G38770
AT5G14170	AT2G38770
AT5G26710	AT2G38770
AT3G01890	AT1G80070
AT3G01890	AT4G38780
AT5G14170	AT1G80070
AT5G14170	AT4G38780
AT2G38770	AT1G80070
AT2G38770	AT4G38780
AT5G58290	AT1G80070
AT5G58290	AT4G38780
AT1G10430	AT4G05420
AT1G10430	AT4G21100
AT2G42500	AT4G05420
AT2G42500	AT4G21100
AT1G69960	AT4G05420
AT1G69960	AT4G21100
AT1G59830	AT4G05420
AT1G59830	AT4G21100
AT1G09690	AT1G02780
AT1G09690	AT3G16780
AT1G09690	AT4G02230
AT1G09690	AT4G18760
AT1G09690	AT4G16030
AT1G57860	AT1G02780
AT1G57860	AT3G16780
AT1G57860	AT4G02230
AT1G57860	AT4G18760
AT1G57860	AT4G16030
AT5G20290	AT1G02780
AT5G20290	AT3G16780
AT5G20290	AT4G02230
AT5G20290	AT4G18760
AT5G20290	AT4G16030
AT1G57660	AT1G02780
AT1G57660	AT3G16780
AT1G57660	AT4G02230
AT1G57660	AT4G18760
AT1G57660	AT4G16030
AT5G59240	AT1G02780
AT5G59240	AT3G16780
AT5G59240	AT4G02230
AT5G59240	AT4G18760
AT5G59240	AT4G16030
AT1G09590	AT1G02780
AT1G09590	AT3G16780
AT1G09590	AT4G02230
AT1G09590	AT4G18760
AT1G09590	AT4G16030
AT1G79990	AT2G16200
AT1G79990	AT4G34450
AT1G60970	AT2G16200
AT1G60970	AT4G34450
AT5G42040	AT2G16200
AT5G42040	AT4G34450
AT5G58290	AT2G16200
AT5G58290	AT4G34450
AT4G08520	AT2G16200
AT4G08520	AT4G34450
AT3G09800	AT2G16200
AT3G09800	AT4G34450
AT1G64520	AT2G16200
AT1G64520	AT4G34450
AT4G16030	AT4G34670
AT4G16030	AT3G04840
AT1G02780	AT4G34670
AT1G02780	AT3G04840
AT5G58290	AT4G34670
AT5G58290	AT3G04840
AT4G02230	AT4G34670
AT4G02230	AT3G04840
AT1G57860	AT4G34670
AT1G57860	AT3G04840
AT5G59240	AT4G34670
AT5G59240	AT3G04840
AT1G09590	AT4G34670
AT1G09590	AT3G04840
AT4G18760	AT4G34670
AT4G18760	AT3G04840
AT3G16780	AT4G34670
AT3G16780	AT3G04840
AT1G09690	AT4G34670
AT1G09690	AT3G04840
AT1G57660	AT4G34670
AT1G57660	AT3G04840
AT5G20290	AT4G34670
AT5G20290	AT3G04840
AT4G21100	AT3G19980
AT4G21100	AT1G50370
AT4G05420	AT3G19980
AT4G05420	AT1G50370
AT2G38770	AT5G58230
AT3G16680	AT5G58230
AT2G16200	AT5G58230
AT3G01890	AT5G58230
AT4G34450	AT5G58230
AT5G14170	AT5G58230
AT3G22320	AT5G58230
AT3G54660	AT3G60750
AT3G54660	AT2G45290
AT3G24170	AT3G60750
AT3G24170	AT2G45290
AT2G04800	AT3G50000
AT2G04800	AT2G23080
AT2G04800	AT2G23070
AT2G04800	AT5G67380
AT2G05720	AT3G50000
AT2G05720	AT2G23080
AT2G05720	AT2G23070
AT2G05720	AT5G67380
AT2G41500	AT3G50000
AT2G41500	AT2G23080
AT2G41500	AT2G23070
AT2G41500	AT5G67380
AT4G34670	AT1G33140
AT4G34670	AT4G10450
AT4G34670	AT1G33120
AT4G02230	AT1G33140
AT4G02230	AT4G10450
AT4G02230	AT1G33120
AT1G02780	AT1G33140
AT1G02780	AT4G10450
AT1G02780	AT1G33120
AT1G57660	AT1G33140
AT1G57660	AT4G10450
AT1G57660	AT1G33120
AT1G57860	AT1G33140
AT1G57860	AT4G10450
AT1G57860	AT1G33120
AT1G09590	AT1G33140
AT1G09590	AT4G10450
AT1G09590	AT1G33120
AT3G04840	AT1G33140
AT3G04840	AT4G10450
AT3G04840	AT1G33120
AT1G09690	AT1G33140
AT1G09690	AT4G10450
AT1G09690	AT1G33120
AT5G20290	AT1G33140
AT5G20290	AT4G10450
AT5G20290	AT1G33120
AT4G18760	AT1G33140
AT4G18760	AT4G10450
AT4G18760	AT1G33120
AT3G16780	AT1G33140
AT3G16780	AT4G10450
AT3G16780	AT1G33120
AT4G16030	AT1G33140
AT4G16030	AT4G10450
AT4G16030	AT1G33120
AT5G59240	AT1G33140
AT5G59240	AT4G10450
AT5G59240	AT1G33120
AT5G58290	AT5G25780
AT5G58290	AT1G49015
AT5G58290	AT5G27640
AT1G64520	AT3G11830
AT5G42040	AT3G11830
AT2G20360	AT5G08530
AT1G48850	AT1G36280
AT1G48850	AT4G18440
AT1G29900	AT1G36280
AT1G29900	AT4G18440
AT5G10540	AT3G58610
AT5G65620	AT3G58610
AT1G04080	AT1G18830
AT1G04080	AT3G63460
AT1G03370	AT1G18830
AT1G03370	AT3G63460
AT3G58610	AT3G08590
AT3G58610	AT1G09780
AT5G08300	AT3G08590
AT5G08300	AT1G09780
AT5G65620	AT3G08590
AT5G65620	AT1G09780
AT5G23250	AT3G08590
AT5G23250	AT1G09780
AT5G10540	AT3G08590
AT5G10540	AT1G09780
AT5G48570	AT1G49630
AT5G48570	AT3G19170
AT3G25230	AT1G49630
AT3G25230	AT3G19170
AT5G20510	AT2G02470
AT5G20510	AT1G14510
AT3G42790	AT2G02470
AT3G42790	AT1G14510
AT5G11980	AT1G73430
AT4G24840	AT1G73430
AT5G11710	AT1G73430
AT1G64520	AT5G20000
AT1G64520	AT5G19990
AT5G42040	AT5G20000
AT5G42040	AT5G19990
AT5G59240	AT5G20000
AT5G59240	AT5G19990
AT3G04840	AT5G20000
AT3G04840	AT5G19990
AT1G13060	AT5G20000
AT1G13060	AT5G19990
AT4G34670	AT5G20000
AT4G34670	AT5G19990
AT5G20290	AT5G20000
AT5G20290	AT5G19990
AT3G26340	AT5G20000
AT3G26340	AT5G19990
AT5G58290	AT5G20000
AT5G58290	AT5G19990
AT1G23900	AT4G11380
AT1G23900	AT4G23460
AT1G23935	AT4G11380
AT1G23935	AT4G23460
AT5G26710	AT4G11380
AT5G26710	AT4G23460
AT1G60070	AT4G11380
AT1G60070	AT4G23460
AT3G01890	AT1G54390
AT5G14170	AT1G54390
AT5G58290	AT3G22990
AT5G45140	AT3G22990
AT4G37880	AT3G22990
AT1G18850	AT3G22990
AT3G01890	AT3G22990
AT1G19810	AT3G22990
AT4G38780	AT3G22990
AT1G80070	AT3G22990
AT5G58230	AT3G22990
AT5G40870	AT3G22990
AT2G22690	AT3G22990
AT3G27190	AT3G22990
AT5G19310	AT3G22990
AT3G06010	AT3G22990
AT5G14170	AT3G22990
AT3G22990	AT1G09060
AT5G26710	AT5G22780
AT5G26710	AT5G22770
AT4G23460	AT5G22780
AT4G23460	AT5G22770
AT4G11380	AT5G22780
AT4G11380	AT5G22770
AT1G64520	AT3G20050
AT5G58290	AT3G20050
AT5G42040	AT3G20050
AT4G34450	AT3G20050
AT3G11830	AT3G20050
AT2G16200	AT3G20050
AT4G18760	AT2G18020
AT4G18760	AT3G51190
AT4G18760	AT4G36130
AT1G09590	AT2G18020
AT1G09590	AT3G51190
AT1G09590	AT4G36130
AT1G33120	AT2G18020
AT1G33120	AT3G51190
AT1G33120	AT4G36130
AT3G07110	AT2G18020
AT3G07110	AT3G51190
AT3G07110	AT4G36130
AT5G48760	AT2G18020
AT5G48760	AT3G51190
AT5G48760	AT4G36130
AT1G02780	AT2G18020
AT1G02780	AT3G51190
AT1G02780	AT4G36130
AT4G02230	AT2G18020
AT4G02230	AT3G51190
AT4G02230	AT4G36130
AT1G57860	AT2G18020
AT1G57860	AT3G51190
AT1G57860	AT4G36130
AT1G09690	AT2G18020
AT1G09690	AT3G51190
AT1G09690	AT4G36130
AT4G13170	AT2G18020
AT4G13170	AT3G51190
AT4G13170	AT4G36130
AT4G16030	AT2G18020
AT4G16030	AT3G51190
AT4G16030	AT4G36130
AT4G10450	AT2G18020
AT4G10450	AT3G51190
AT4G10450	AT4G36130
AT3G16780	AT2G18020
AT3G16780	AT3G51190
AT3G16780	AT4G36130
AT3G04840	AT2G18020
AT3G04840	AT3G51190
AT3G04840	AT4G36130
AT3G24830	AT2G18020
AT3G24830	AT3G51190
AT3G24830	AT4G36130
AT1G33140	AT2G18020
AT1G33140	AT3G51190
AT1G33140	AT4G36130
AT4G34670	AT2G18020
AT4G34670	AT3G51190
AT4G34670	AT4G36130
AT1G57660	AT2G18020
AT1G57660	AT3G51190
AT1G57660	AT4G36130
AT5G59240	AT2G18020
AT5G59240	AT3G51190
AT5G59240	AT4G36130
AT5G20290	AT2G18020
AT5G20290	AT3G51190
AT5G20290	AT4G36130
AT3G22990	AT1G61150
AT3G22990	AT4G09300
AT2G22690	AT1G61150
AT2G22690	AT4G09300
AT4G37880	AT1G61150
AT4G37880	AT4G09300
AT4G02230	AT2G37270
AT4G02230	AT3G11940
AT3G51190	AT2G37270
AT3G51190	AT3G11940
AT1G09590	AT2G37270
AT1G09590	AT3G11940
AT1G57860	AT2G37270
AT1G57860	AT3G11940
AT1G57660	AT2G37270
AT1G57660	AT3G11940
AT1G09690	AT2G37270
AT1G09690	AT3G11940
AT5G58290	AT2G37270
AT5G58290	AT3G11940
AT5G59240	AT2G37270
AT5G59240	AT3G11940
AT4G36130	AT2G37270
AT4G36130	AT3G11940
AT2G18020	AT2G37270
AT2G18020	AT3G11940
AT4G16030	AT2G37270
AT4G16030	AT3G11940
AT4G18760	AT2G37270
AT4G18760	AT3G11940
AT3G04840	AT2G37270
AT3G04840	AT3G11940
AT4G34670	AT2G37270
AT4G34670	AT3G11940
AT1G33120	AT2G37270
AT1G33120	AT3G11940
AT1G02780	AT2G37270
AT1G02780	AT3G11940
AT1G33140	AT2G37270
AT1G33140	AT3G11940
AT5G20290	AT2G37270
AT5G20290	AT3G11940
AT4G10450	AT2G37270
AT4G10450	AT3G11940
AT3G16780	AT2G37270
AT3G16780	AT3G11940
AT4G34670	AT1G74050
AT4G34670	AT1G18540
AT4G34670	AT1G74060
AT1G57860	AT1G74050
AT1G57860	AT1G18540
AT1G57860	AT1G74060
AT1G33120	AT1G74050
AT1G33120	AT1G18540
AT1G33120	AT1G74060
AT4G10450	AT1G74050
AT4G10450	AT1G18540
AT4G10450	AT1G74060
AT3G51190	AT1G74050
AT3G51190	AT1G18540
AT3G51190	AT1G74060
AT4G36130	AT1G74050
AT4G36130	AT1G18540
AT4G36130	AT1G74060
AT1G09590	AT1G74050
AT1G09590	AT1G18540
AT1G09590	AT1G74060
AT4G18760	AT1G74050
AT4G18760	AT1G18540
AT4G18760	AT1G74060
AT2G18020	AT1G74050
AT2G18020	AT1G18540
AT2G18020	AT1G74060
AT1G33140	AT1G74050
AT1G33140	AT1G18540
AT1G33140	AT1G74060
AT1G57660	AT1G74050
AT1G57660	AT1G18540
AT1G57660	AT1G74060
AT3G04840	AT1G74050
AT3G04840	AT1G18540
AT3G04840	AT1G74060
AT4G02230	AT1G74050
AT4G02230	AT1G18540
AT4G02230	AT1G74060
AT4G16030	AT1G74050
AT4G16030	AT1G18540
AT4G16030	AT1G74060
AT4G01310	AT1G74050
AT4G01310	AT1G18540
AT4G01310	AT1G74060
AT5G20290	AT1G74050
AT5G20290	AT1G18540
AT5G20290	AT1G74060
AT1G09690	AT1G74050
AT1G09690	AT1G18540
AT1G09690	AT1G74060
AT5G59240	AT1G74050
AT5G59240	AT1G18540
AT5G59240	AT1G74060
AT3G16780	AT1G74050
AT3G16780	AT1G18540
AT3G16780	AT1G74060
AT1G02780	AT1G74050
AT1G02780	AT1G18540
AT1G02780	AT1G74060
AT3G16780	AT5G10360
AT3G16780	AT4G31700
AT1G33140	AT5G10360
AT1G33140	AT4G31700
AT1G02780	AT5G10360
AT1G02780	AT4G31700
AT4G16030	AT5G10360
AT4G16030	AT4G31700
AT5G59240	AT5G10360
AT5G59240	AT4G31700
AT1G74060	AT5G10360
AT1G74060	AT4G31700
AT5G20290	AT5G10360
AT5G20290	AT4G31700
AT2G37270	AT5G10360
AT2G37270	AT4G31700
AT3G11940	AT5G10360
AT3G11940	AT4G31700
AT3G04840	AT5G10360
AT3G04840	AT4G31700
AT2G18020	AT5G10360
AT2G18020	AT4G31700
AT4G10450	AT5G10360
AT4G10450	AT4G31700
AT1G33120	AT5G10360
AT1G33120	AT4G31700
AT1G74050	AT5G10360
AT1G74050	AT4G31700
AT1G18540	AT5G10360
AT1G18540	AT4G31700
AT4G34670	AT5G10360
AT4G34670	AT4G31700
AT4G36130	AT5G10360
AT4G36130	AT4G31700
AT4G18760	AT5G10360
AT4G18760	AT4G31700
AT3G51190	AT5G10360
AT3G51190	AT4G31700
AT4G02230	AT5G10360
AT4G02230	AT4G31700
AT2G42370	AT3G02950
AT2G42370	AT5G16790
AT1G61150	AT3G02950
AT1G61150	AT5G16790
AT3G22990	AT3G02950
AT3G22990	AT5G16790
AT3G52670	AT3G02950
AT3G52670	AT5G16790
AT4G09300	AT3G02950
AT4G09300	AT5G16790
AT1G09690	AT3G02950
AT1G09690	AT5G16790
AT1G09590	AT3G02950
AT1G09590	AT5G16790
AT3G58110	AT3G02950
AT3G58110	AT5G16790
AT1G09060	AT3G02950
AT1G09060	AT5G16790
AT1G18850	AT3G02950
AT1G18850	AT5G16790
AT3G01890	AT3G02950
AT3G01890	AT5G16790
AT1G57660	AT3G02950
AT1G57660	AT5G16790
AT1G19810	AT3G02950
AT1G19810	AT5G16790
AT5G14170	AT3G02950
AT5G14170	AT5G16790
AT1G57860	AT3G02950
AT1G57860	AT5G16790
AT5G58290	AT3G02950
AT5G58290	AT5G16790
AT3G60880	AT1G74260
AT3G19170	AT1G74260
AT1G49630	AT1G74260
AT2G45440	AT1G74260
AT5G38840	AT3G60500
AT5G38840	AT3G12990
AT5G35910	AT3G60500
AT5G35910	AT3G12990
AT1G54440	AT3G60500
AT1G54440	AT3G12990
AT1G09830	AT3G53580
AT4G38930	AT3G53580
AT2G21270	AT3G53580
AT5G26710	AT5G46630
AT4G23460	AT5G46630
AT4G11380	AT5G46630
AT5G22780	AT5G46630
AT5G22770	AT5G46630
AT5G59240	AT1G53750
AT5G59240	AT1G53780
AT2G38770	AT1G53750
AT2G38770	AT1G53780
AT5G20290	AT1G53750
AT5G20290	AT1G53780
AT2G16200	AT1G53750
AT2G16200	AT1G53780
AT5G20000	AT1G53750
AT5G20000	AT1G53780
AT1G74050	AT1G53750
AT1G74050	AT1G53780
AT4G34670	AT1G53750
AT4G34670	AT1G53780
AT1G74060	AT1G53750
AT1G74060	AT1G53780
AT3G04840	AT1G53750
AT3G04840	AT1G53780
AT1G18540	AT1G53750
AT1G18540	AT1G53780
AT3G26340	AT1G53750
AT3G26340	AT1G53780
AT1G13060	AT1G53750
AT1G13060	AT1G53780
AT1G64520	AT1G53750
AT1G64520	AT1G53780
AT5G42040	AT1G53750
AT5G42040	AT1G53780
AT3G20050	AT1G53750
AT3G20050	AT1G53780
AT4G34450	AT1G53750
AT4G34450	AT1G53780
AT5G19990	AT1G53750
AT5G19990	AT1G53780
AT5G58290	AT1G53750
AT5G58290	AT1G53780
AT5G10540	AT1G79870
AT5G65620	AT1G79870
AT3G12500	AT4G11650
AT1G49015	AT3G11400
AT1G49015	AT5G06000
AT5G25780	AT3G11400
AT5G25780	AT5G06000
AT5G27640	AT3G11400
AT5G27640	AT5G06000
AT3G19170	AT5G63860
AT1G49630	AT5G63860
AT1G29900	AT2G36390
AT1G29900	AT5G03650
AT1G74260	AT2G36390
AT1G74260	AT5G03650
AT2G21470	AT5G50680
AT2G21470	AT5G50580
AT2G21470	AT4G24940
AT4G04940	AT1G15440
AT5G11980	AT5G16300
AT1G73430	AT5G16300
AT5G11710	AT5G16300
AT4G24840	AT5G16300
AT3G25530	AT3G07100
AT2G17160	AT3G07100
AT2G21630	AT3G07100
AT4G14160	AT3G07100
AT1G05520	AT3G07100
AT1G04940	AT3G07100
AT4G16260	AT3G07100
AT3G23660	AT3G07100
AT3G03100	AT5G11770
AT4G05420	AT2G04030
AT4G21100	AT2G04030
AT5G20290	AT4G30800
AT5G20290	AT3G48930
AT5G20290	AT5G23740
AT1G33120	AT4G30800
AT1G33120	AT3G48930
AT1G33120	AT5G23740
AT3G04840	AT4G30800
AT3G04840	AT3G48930
AT3G04840	AT5G23740
AT4G34670	AT4G30800
AT4G34670	AT3G48930
AT4G34670	AT5G23740
AT5G16790	AT4G30800
AT5G16790	AT3G48930
AT5G16790	AT5G23740
AT1G74060	AT4G30800
AT1G74060	AT3G48930
AT1G74060	AT5G23740
AT2G18020	AT4G30800
AT2G18020	AT3G48930
AT2G18020	AT5G23740
AT1G09590	AT4G30800
AT1G09590	AT3G48930
AT1G09590	AT5G23740
AT5G10360	AT4G30800
AT5G10360	AT3G48930
AT5G10360	AT5G23740
AT4G10450	AT4G30800
AT4G10450	AT3G48930
AT4G10450	AT5G23740
AT4G36130	AT4G30800
AT4G36130	AT3G48930
AT4G36130	AT5G23740
AT3G51190	AT4G30800
AT3G51190	AT3G48930
AT3G51190	AT5G23740
AT1G33140	AT4G30800
AT1G33140	AT3G48930
AT1G33140	AT5G23740
AT4G31700	AT4G30800
AT4G31700	AT3G48930
AT4G31700	AT5G23740
AT1G57860	AT4G30800
AT1G57860	AT3G48930
AT1G57860	AT5G23740
AT5G20000	AT4G30800
AT5G20000	AT3G48930
AT5G20000	AT5G23740
AT1G74050	AT4G30800
AT1G74050	AT3G48930
AT1G74050	AT5G23740
AT5G19990	AT4G30800
AT5G19990	AT3G48930
AT5G19990	AT5G23740
AT4G01310	AT4G30800
AT4G01310	AT3G48930
AT4G01310	AT5G23740
AT1G53780	AT4G30800
AT1G53780	AT3G48930
AT1G53780	AT5G23740
AT5G58290	AT4G30800
AT5G58290	AT3G48930
AT5G58290	AT5G23740
AT2G37270	AT4G30800
AT2G37270	AT3G48930
AT2G37270	AT5G23740
AT1G57660	AT4G30800
AT1G57660	AT3G48930
AT1G57660	AT5G23740
AT1G09690	AT4G30800
AT1G09690	AT3G48930
AT1G09690	AT5G23740
AT1G18540	AT4G30800
AT1G18540	AT3G48930
AT1G18540	AT5G23740
AT3G02950	AT4G30800
AT3G02950	AT3G48930
AT3G02950	AT5G23740
AT4G16030	AT4G30800
AT4G16030	AT3G48930
AT4G16030	AT5G23740
AT4G02230	AT4G30800
AT4G02230	AT3G48930
AT4G02230	AT5G23740
AT1G02780	AT4G30800
AT1G02780	AT3G48930
AT1G02780	AT5G23740
AT5G59240	AT4G30800
AT5G59240	AT3G48930
AT5G59240	AT5G23740
AT4G18760	AT4G30800
AT4G18760	AT3G48930
AT4G18760	AT5G23740
AT3G16780	AT4G30800
AT3G16780	AT3G48930
AT3G16780	AT5G23740
AT1G53750	AT4G30800
AT1G53750	AT3G48930
AT1G53750	AT5G23740
AT3G11940	AT4G30800
AT3G11940	AT3G48930
AT3G11940	AT5G23740
AT4G18440	AT2G19940
AT1G48850	AT2G19940
AT1G36280	AT2G19940
AT2G20060	AT4G28360
AT2G20060	AT1G52370
AT3G22990	AT3G60830
AT3G22320	AT3G60830
AT1G64520	AT3G60830
AT5G58290	AT3G60830
AT2G38770	AT3G60830
AT4G38780	AT3G60830
AT4G21100	AT3G60830
AT4G05420	AT3G60830
AT5G14170	AT3G60830
AT5G42040	AT3G60830
AT1G80070	AT3G60830
AT5G58230	AT3G60830
AT3G01890	AT3G60830
AT3G16680	AT3G60830
AT1G74850	AT3G04260
AT1G50370	AT5G05470
AT1G50370	AT2G40290
AT2G04800	AT5G05470
AT2G04800	AT2G40290
AT2G05720	AT5G05470
AT2G05720	AT2G40290
AT5G01940	AT5G05470
AT5G01940	AT2G40290
AT3G19980	AT5G05470
AT3G19980	AT2G40290
AT5G20920	AT5G05470
AT5G20920	AT2G40290
AT2G41500	AT5G05470
AT2G41500	AT2G40290
AT3G07920	AT5G05470
AT3G07920	AT2G40290
AT5G26780	AT1G24360
AT4G35630	AT1G24360
AT2G17630	AT1G24360
AT4G37930	AT1G24360
AT3G54610	AT5G25150
AT3G60830	AT5G25150
AT3G58610	AT3G54470
AT3G52990	AT5G55530
AT3G52990	AT5G08490
AT3G52990	AT5G56350
AT3G52990	AT5G63680
AT3G52990	AT4G26390
AT3G52990	AT5G08570
AT3G52990	AT5G63250
AT2G36580	AT5G55530
AT2G36580	AT5G08490
AT2G36580	AT5G56350
AT2G36580	AT5G63680
AT2G36580	AT4G26390
AT2G36580	AT5G08570
AT2G36580	AT5G63250
AT2G33300	AT5G55530
AT2G33300	AT5G08490
AT2G33300	AT5G56350
AT2G33300	AT5G63680
AT2G33300	AT4G26390
AT2G33300	AT5G08570
AT2G33300	AT5G63250
AT1G53780	AT4G20850
AT5G19990	AT4G20850
AT5G58290	AT4G20850
AT1G64520	AT4G20850
AT5G20000	AT4G20850
AT5G42040	AT4G20850
AT1G53750	AT4G20850
AT5G58290	AT5G16070
AT5G58290	AT3G02530
AT1G64520	AT5G16070
AT1G64520	AT3G02530
AT5G42040	AT5G16070
AT5G42040	AT3G02530
AT4G34450	AT5G16070
AT4G34450	AT3G02530
AT2G16200	AT5G16070
AT2G16200	AT3G02530
AT3G11830	AT5G16070
AT3G11830	AT3G02530
AT3G20050	AT5G16070
AT3G20050	AT3G02530
AT5G14800	AT2G07690
AT2G41500	AT2G07690
AT2G05720	AT2G07690
AT2G04800	AT2G07690
AT1G02140	AT3G19760
AT1G57660	AT5G42920
AT1G09590	AT5G42920
AT1G09690	AT5G42920
AT1G57860	AT5G42920
AT3G52670	AT5G42920
AT3G22990	AT5G42920
AT1G80070	AT5G42920
AT3G58110	AT5G42920
AT5G16790	AT5G42920
AT3G01890	AT5G42920
AT2G42370	AT5G42920
AT4G38780	AT5G42920
AT5G14170	AT5G42920
AT3G02950	AT5G42920
AT5G08300	AT3G55440
AT5G23250	AT3G55440
AT3G06860	AT2G22230
AT3G06860	AT5G10160
AT3G06860	AT5G09790
AT5G46630	AT2G40660
AT3G11710	AT2G40660
AT3G30805	AT2G40660
AT5G26710	AT2G40660
AT5G20290	AT5G35530
AT5G20290	AT3G53870
AT5G20290	AT2G31610
AT5G59240	AT5G35530
AT5G59240	AT3G53870
AT5G59240	AT2G31610
AT1G09690	AT5G35530
AT1G09690	AT3G53870
AT1G09690	AT2G31610
AT4G36130	AT5G35530
AT4G36130	AT3G53870
AT4G36130	AT2G31610
AT5G19990	AT5G35530
AT5G19990	AT3G53870
AT5G19990	AT2G31610
AT2G18020	AT5G35530
AT2G18020	AT3G53870
AT2G18020	AT2G31610
AT4G30800	AT5G35530
AT4G30800	AT3G53870
AT4G30800	AT2G31610
AT5G20000	AT5G35530
AT5G20000	AT3G53870
AT5G20000	AT2G31610
AT4G18760	AT5G35530
AT4G18760	AT3G53870
AT4G18760	AT2G31610
AT1G74060	AT5G35530
AT1G74060	AT3G53870
AT1G74060	AT2G31610
AT3G02950	AT5G35530
AT3G02950	AT3G53870
AT3G02950	AT2G31610
AT3G51190	AT5G35530
AT3G51190	AT3G53870
AT3G51190	AT2G31610
AT4G02230	AT5G35530
AT4G02230	AT3G53870
AT4G02230	AT2G31610
AT5G23740	AT5G35530
AT5G23740	AT3G53870
AT5G23740	AT2G31610
AT5G58290	AT5G35530
AT5G58290	AT3G53870
AT5G58290	AT2G31610
AT4G34670	AT5G35530
AT4G34670	AT3G53870
AT4G34670	AT2G31610
AT4G31700	AT5G35530
AT4G31700	AT3G53870
AT4G31700	AT2G31610
AT1G18540	AT5G35530
AT1G18540	AT3G53870
AT1G18540	AT2G31610
AT1G02780	AT5G35530
AT1G02780	AT3G53870
AT1G02780	AT2G31610
AT1G74050	AT5G35530
AT1G74050	AT3G53870
AT1G74050	AT2G31610
AT1G80070	AT5G35530
AT1G80070	AT3G53870
AT1G80070	AT2G31610
AT1G09590	AT5G35530
AT1G09590	AT3G53870
AT1G09590	AT2G31610
AT1G53780	AT5G35530
AT1G53780	AT3G53870
AT1G53780	AT2G31610
AT2G37270	AT5G35530
AT2G37270	AT3G53870
AT2G37270	AT2G31610
AT5G10360	AT5G35530
AT5G10360	AT3G53870
AT5G10360	AT2G31610
AT3G48930	AT5G35530
AT3G48930	AT3G53870
AT3G48930	AT2G31610
AT1G33140	AT5G35530
AT1G33140	AT3G53870
AT1G33140	AT2G31610
AT1G57660	AT5G35530
AT1G57660	AT3G53870
AT1G57660	AT2G31610
AT4G38780	AT5G35530
AT4G38780	AT3G53870
AT4G38780	AT2G31610
AT1G33120	AT5G35530
AT1G33120	AT3G53870
AT1G33120	AT2G31610
AT3G16780	AT5G35530
AT3G16780	AT3G53870
AT3G16780	AT2G31610
AT4G16030	AT5G35530
AT4G16030	AT3G53870
AT4G16030	AT2G31610
AT4G10450	AT5G35530
AT4G10450	AT3G53870
AT4G10450	AT2G31610
AT3G11940	AT5G35530
AT3G11940	AT3G53870
AT3G11940	AT2G31610
AT1G57860	AT5G35530
AT1G57860	AT3G53870
AT1G57860	AT2G31610
AT5G16790	AT5G35530
AT5G16790	AT3G53870
AT5G16790	AT2G31610
AT3G04840	AT5G35530
AT3G04840	AT3G53870
AT3G04840	AT2G31610
AT1G53750	AT5G35530
AT1G53750	AT3G53870
AT1G53750	AT2G31610
AT2G40290	AT1G30120
AT2G40290	AT2G34590
AT4G21100	AT1G30120
AT4G21100	AT2G34590
AT4G05420	AT1G30120
AT4G05420	AT2G34590
AT1G01090	AT1G30120
AT1G01090	AT2G34590
AT5G05470	AT1G30120
AT5G05470	AT2G34590
AT5G58290	AT1G29940
AT4G35800	AT1G29940
AT3G16680	AT1G29940
AT3G01890	AT1G29940
AT5G14170	AT1G29940
AT3G60830	AT1G29940
AT3G22320	AT1G29940
AT5G58230	AT1G29940
AT2G38770	AT1G29940
AT3G60830	AT2G17930
AT3G60830	AT4G36080
AT3G22320	AT2G17930
AT3G22320	AT4G36080
AT3G22990	AT2G17930
AT3G22990	AT4G36080
AT5G25150	AT2G17930
AT5G25150	AT4G36080
AT2G38770	AT2G17930
AT2G38770	AT4G36080
AT3G16680	AT2G17930
AT3G16680	AT4G36080
AT1G09690	AT2G47570
AT1G09690	AT5G27850
AT1G09690	AT3G05590
AT4G16030	AT2G47570
AT4G16030	AT5G27850
AT4G16030	AT3G05590
AT2G37270	AT2G47570
AT2G37270	AT5G27850
AT2G37270	AT3G05590
AT2G31610	AT2G47570
AT2G31610	AT5G27850
AT2G31610	AT3G05590
AT3G51190	AT2G47570
AT3G51190	AT5G27850
AT3G51190	AT3G05590
AT1G57860	AT2G47570
AT1G57860	AT5G27850
AT1G57860	AT3G05590
AT1G74060	AT2G47570
AT1G74060	AT5G27850
AT1G74060	AT3G05590
AT1G57660	AT2G47570
AT1G57660	AT5G27850
AT1G57660	AT3G05590
AT3G24830	AT2G47570
AT3G24830	AT5G27850
AT3G24830	AT3G05590
AT3G04840	AT2G47570
AT3G04840	AT5G27850
AT3G04840	AT3G05590
AT3G11940	AT2G47570
AT3G11940	AT5G27850
AT3G11940	AT3G05590
AT5G59240	AT2G47570
AT5G59240	AT5G27850
AT5G59240	AT3G05590
AT3G53870	AT2G47570
AT3G53870	AT5G27850
AT3G53870	AT3G05590
AT4G30800	AT2G47570
AT4G30800	AT5G27850
AT4G30800	AT3G05590
AT1G09590	AT2G47570
AT1G09590	AT5G27850
AT1G09590	AT3G05590
AT5G20290	AT2G47570
AT5G20290	AT5G27850
AT5G20290	AT3G05590
AT5G48760	AT2G47570
AT5G48760	AT5G27850
AT5G48760	AT3G05590
AT1G33140	AT2G47570
AT1G33140	AT5G27850
AT1G33140	AT3G05590
AT4G36130	AT2G47570
AT4G36130	AT5G27850
AT4G36130	AT3G05590
AT4G31700	AT2G47570
AT4G31700	AT5G27850
AT4G31700	AT3G05590
AT1G33120	AT2G47570
AT1G33120	AT5G27850
AT1G33120	AT3G05590
AT2G18020	AT2G47570
AT2G18020	AT5G27850
AT2G18020	AT3G05590
AT4G13170	AT2G47570
AT4G13170	AT5G27850
AT4G13170	AT3G05590
AT1G18540	AT2G47570
AT1G18540	AT5G27850
AT1G18540	AT3G05590
AT4G18760	AT2G47570
AT4G18760	AT5G27850
AT4G18760	AT3G05590
AT4G34670	AT2G47570
AT4G34670	AT5G27850
AT4G34670	AT3G05590
AT1G74050	AT2G47570
AT1G74050	AT5G27850
AT1G74050	AT3G05590
AT3G16780	AT2G47570
AT3G16780	AT5G27850
AT3G16780	AT3G05590
AT5G23740	AT2G47570
AT5G23740	AT5G27850
AT5G23740	AT3G05590
AT5G35530	AT2G47570
AT5G35530	AT5G27850
AT5G35530	AT3G05590
AT3G48930	AT2G47570
AT3G48930	AT5G27850
AT3G48930	AT3G05590
AT5G10360	AT2G47570
AT5G10360	AT5G27850
AT5G10360	AT3G05590
AT3G07110	AT2G47570
AT3G07110	AT5G27850
AT3G07110	AT3G05590
AT1G02780	AT2G47570
AT1G02780	AT5G27850
AT1G02780	AT3G05590
AT4G10450	AT2G47570
AT4G10450	AT5G27850
AT4G10450	AT3G05590
AT4G02230	AT2G47570
AT4G02230	AT5G27850
AT4G02230	AT3G05590
AT5G16790	AT3G22860
AT5G16790	AT3G56150
AT2G38770	AT3G22860
AT2G38770	AT3G56150
AT3G02950	AT3G22860
AT3G02950	AT3G56150
AT1G53780	AT3G22860
AT1G53780	AT3G56150
AT3G11400	AT3G22860
AT3G11400	AT3G56150
AT3G01890	AT3G22860
AT3G01890	AT3G56150
AT3G22990	AT3G22860
AT3G22990	AT3G56150
AT5G58290	AT3G22860
AT5G58290	AT3G56150
AT5G25780	AT3G22860
AT5G25780	AT3G56150
AT1G64520	AT3G22860
AT1G64520	AT3G56150
AT5G42040	AT3G22860
AT5G42040	AT3G56150
AT1G53750	AT3G22860
AT1G53750	AT3G56150
AT5G14170	AT3G22860
AT5G14170	AT3G56150
AT3G60830	AT3G22860
AT3G60830	AT3G56150
AT1G49015	AT3G22860
AT1G49015	AT3G56150
AT5G27640	AT3G22860
AT5G27640	AT3G56150
AT5G06000	AT3G22860
AT5G06000	AT3G56150
AT5G58230	AT3G22860
AT5G58230	AT3G56150
AT4G34450	AT3G02270
AT4G34450	AT2G34970
AT4G34450	AT4G18300
AT2G40660	AT3G02270
AT2G40660	AT2G34970
AT2G40660	AT4G18300
AT2G16200	AT3G02270
AT2G16200	AT2G34970
AT2G16200	AT4G18300
AT1G53750	AT3G02270
AT1G53750	AT2G34970
AT1G53750	AT4G18300
AT1G53780	AT3G02270
AT1G53780	AT2G34970
AT1G53780	AT4G18300
AT5G26710	AT3G02270
AT5G26710	AT2G34970
AT5G26710	AT4G18300
AT5G58290	AT3G02270
AT5G58290	AT2G34970
AT5G58290	AT4G18300
AT1G29940	AT1G68750
AT2G32520	AT1G16860
AT2G32520	AT1G16080
AT2G28860	AT1G16860
AT2G28860	AT1G16080
AT3G30805	AT1G09620
AT3G11710	AT1G09620
AT3G62310	AT4G22410
AT3G62310	AT4G22290
AT3G62310	AT4G22285
AT3G62310	AT4G22350
AT5G14900	AT4G22410
AT5G14900	AT4G22290
AT5G14900	AT4G22285
AT5G14900	AT4G22350
AT2G47250	AT4G22410
AT2G47250	AT4G22290
AT2G47250	AT4G22285
AT2G47250	AT4G22350
AT5G16790	AT5G16270
AT3G22990	AT5G16270
AT3G02950	AT5G16270
AT5G65620	AT2G40490
AT2G17630	AT2G40490
AT4G35630	AT2G40490
AT5G36210	AT2G40490
AT5G10540	AT2G40490
AT4G01310	AT1G05190
AT5G19440	AT3G12780
AT5G19440	AT1G56190
AT5G19440	AT1G79550
AT1G51410	AT3G12780
AT1G51410	AT1G56190
AT1G51410	AT1G79550
AT5G19330	AT3G12780
AT5G19330	AT1G56190
AT5G19330	AT1G79550
AT3G01890	AT5G60040
AT5G14170	AT5G60040
AT3G60830	AT5G60040
AT3G22990	AT5G60040
AT5G45140	AT5G60040
AT3G11710	AT5G26830
AT3G11710	AT1G17960
AT3G11710	AT1G18130
AT1G09620	AT5G26830
AT1G09620	AT1G17960
AT1G09620	AT1G18130
AT3G30805	AT5G26830
AT3G30805	AT1G17960
AT3G30805	AT1G18130
AT5G15450	AT5G26830
AT5G15450	AT1G17960
AT5G15450	AT1G18130
AT1G51710	AT5G27470
AT3G21280	AT5G27470
AT4G37930	AT5G27470
AT5G26780	AT5G27470
AT3G11830	AT5G66140
AT3G11830	AT3G51260
AT1G04080	AT5G66140
AT1G04080	AT3G51260
AT1G53780	AT5G66140
AT1G53780	AT3G51260
AT1G53750	AT5G66140
AT1G53750	AT3G51260
AT3G20050	AT5G66140
AT3G20050	AT3G51260
AT2G16200	AT5G66140
AT2G16200	AT3G51260
AT3G22320	AT5G66140
AT3G22320	AT3G51260
AT3G16680	AT5G66140
AT3G16680	AT3G51260
AT5G58290	AT5G66140
AT5G58290	AT3G51260
AT1G13060	AT5G66140
AT1G13060	AT3G51260
AT4G34450	AT5G66140
AT4G34450	AT3G51260
AT5G19990	AT5G66140
AT5G19990	AT3G51260
AT1G03370	AT5G66140
AT1G03370	AT3G51260
AT5G42040	AT5G66140
AT5G42040	AT3G51260
AT5G16070	AT5G66140
AT5G16070	AT3G51260
AT3G02530	AT5G66140
AT3G02530	AT3G51260
AT5G20000	AT5G66140
AT5G20000	AT3G51260
AT3G26340	AT5G66140
AT3G26340	AT3G51260
AT1G64520	AT5G66140
AT1G64520	AT3G51260
AT1G29900	AT1G05180
AT1G29900	AT3G25880
AT1G29900	AT2G32410
AT2G19940	AT1G05180
AT2G19940	AT3G25880
AT2G19940	AT2G32410
AT1G74040	AT1G05180
AT1G74040	AT3G25880
AT1G74040	AT2G32410
AT1G18500	AT1G05180
AT1G18500	AT3G25880
AT1G18500	AT2G32410
AT2G16960	AT5G19820
AT2G16950	AT5G19820
AT5G12860	AT5G01530
AT5G12860	AT3G08940
AT5G12860	AT2G40100
AT3G48850	AT5G01530
AT3G48850	AT3G08940
AT3G48850	AT2G40100
AT5G12850	AT5G01530
AT5G12850	AT3G08940
AT5G12850	AT2G40100
AT5G13440	AT5G01530
AT5G13440	AT3G08940
AT5G13440	AT2G40100
AT5G14040	AT5G01530
AT5G14040	AT3G08940
AT5G14040	AT2G40100
AT5G13430	AT5G01530
AT5G13430	AT3G08940
AT5G13430	AT2G40100
AT1G09590	AT3G09200
AT1G09590	AT3G11250
AT1G09590	AT2G40010
AT1G74060	AT3G09200
AT1G74060	AT3G11250
AT1G74060	AT2G40010
AT3G48930	AT3G09200
AT3G48930	AT3G11250
AT3G48930	AT2G40010
AT1G33140	AT3G09200
AT1G33140	AT3G11250
AT1G33140	AT2G40010
AT4G34670	AT3G09200
AT4G34670	AT3G11250
AT4G34670	AT2G40010
AT2G18020	AT3G09200
AT2G18020	AT3G11250
AT2G18020	AT2G40010
AT5G35530	AT3G09200
AT5G35530	AT3G11250
AT5G35530	AT2G40010
AT2G47570	AT3G09200
AT2G47570	AT3G11250
AT2G47570	AT2G40010
AT1G74050	AT3G09200
AT1G74050	AT3G11250
AT1G74050	AT2G40010
AT5G59240	AT3G09200
AT5G59240	AT3G11250
AT5G59240	AT2G40010
AT4G16030	AT3G09200
AT4G16030	AT3G11250
AT4G16030	AT2G40010
AT4G02230	AT3G09200
AT4G02230	AT3G11250
AT4G02230	AT2G40010
AT4G10450	AT3G09200
AT4G10450	AT3G11250
AT4G10450	AT2G40010
AT5G10360	AT3G09200
AT5G10360	AT3G11250
AT5G10360	AT2G40010
AT3G05590	AT3G09200
AT3G05590	AT3G11250
AT3G05590	AT2G40010
AT5G27850	AT3G09200
AT5G27850	AT3G11250
AT5G27850	AT2G40010
AT1G02780	AT3G09200
AT1G02780	AT3G11250
AT1G02780	AT2G40010
AT1G57860	AT3G09200
AT1G57860	AT3G11250
AT1G57860	AT2G40010
AT1G18540	AT3G09200
AT1G18540	AT3G11250
AT1G18540	AT2G40010
AT4G18760	AT3G09200
AT4G18760	AT3G11250
AT4G18760	AT2G40010
AT1G09690	AT3G09200
AT1G09690	AT3G11250
AT1G09690	AT2G40010
AT3G51190	AT3G09200
AT3G51190	AT3G11250
AT3G51190	AT2G40010
AT1G57660	AT3G09200
AT1G57660	AT3G11250
AT1G57660	AT2G40010
AT4G30800	AT3G09200
AT4G30800	AT3G11250
AT4G30800	AT2G40010
AT1G33120	AT3G09200
AT1G33120	AT3G11250
AT1G33120	AT2G40010
AT4G31700	AT3G09200
AT4G31700	AT3G11250
AT4G31700	AT2G40010
AT3G16780	AT3G09200
AT3G16780	AT3G11250
AT3G16780	AT2G40010
AT3G53870	AT3G09200
AT3G53870	AT3G11250
AT3G53870	AT2G40010
AT5G58290	AT3G09200
AT5G58290	AT3G11250
AT5G58290	AT2G40010
AT3G04840	AT3G09200
AT3G04840	AT3G11250
AT3G04840	AT2G40010
AT2G31610	AT3G09200
AT2G31610	AT3G11250
AT2G31610	AT2G40010
AT5G20290	AT3G09200
AT5G20290	AT3G11250
AT5G20290	AT2G40010
AT5G23740	AT3G09200
AT5G23740	AT3G11250
AT5G23740	AT2G40010
AT4G36130	AT3G09200
AT4G36130	AT3G11250
AT4G36130	AT2G40010
AT3G24830	AT5G46070
AT3G24830	AT5G44510
AT4G13170	AT5G46070
AT4G13170	AT5G44510
AT3G07110	AT5G46070
AT3G07110	AT5G44510
AT5G48760	AT5G46070
AT5G48760	AT5G44510
AT2G42370	AT3G44530
AT5G16270	AT3G44530
AT3G02950	AT3G44530
AT3G52670	AT3G44530
AT3G58110	AT3G44530
AT3G22990	AT3G44530
AT5G16790	AT3G44530
AT5G26710	AT3G04600
AT2G40660	AT3G04600
AT1G05190	AT2G43030
AT4G01310	AT2G43030
AT5G36210	AT1G17650
AT5G36210	AT3G25530
AT2G40490	AT1G17650
AT2G40490	AT3G25530
AT5G36210	AT5G36880
AT1G20950	AT4G08876
AT1G20950	AT1G12000
AT1G20950	AT4G04040
AT1G76550	AT4G08876
AT1G76550	AT1G12000
AT1G76550	AT4G04040
AT4G24840	AT1G31780
AT5G16300	AT1G31780
AT1G73430	AT1G31780
AT5G26830	AT2G33840
AT5G26830	AT1G28350
AT1G18130	AT2G33840
AT1G18130	AT1G28350
AT1G17960	AT2G33840
AT1G17960	AT1G28350
AT5G52040	AT2G45640
AT4G25500	AT2G45640
AT1G57660	AT3G60770
AT1G57660	AT4G00100
AT2G31610	AT3G60770
AT2G31610	AT4G00100
AT1G33140	AT3G60770
AT1G33140	AT4G00100
AT5G10360	AT3G60770
AT5G10360	AT4G00100
AT1G33120	AT3G60770
AT1G33120	AT4G00100
AT5G20290	AT3G60770
AT5G20290	AT4G00100
AT1G74050	AT3G60770
AT1G74050	AT4G00100
AT5G59240	AT3G60770
AT5G59240	AT4G00100
AT2G40010	AT3G60770
AT2G40010	AT4G00100
AT4G18760	AT3G60770
AT4G18760	AT4G00100
AT4G16030	AT3G60770
AT4G16030	AT4G00100
AT5G35530	AT3G60770
AT5G35530	AT4G00100
AT4G31700	AT3G60770
AT4G31700	AT4G00100
AT1G09690	AT3G60770
AT1G09690	AT4G00100
AT1G18540	AT3G60770
AT1G18540	AT4G00100
AT3G11940	AT3G60770
AT3G11940	AT4G00100
AT4G02230	AT3G60770
AT4G02230	AT4G00100
AT3G48930	AT3G60770
AT3G48930	AT4G00100
AT3G53870	AT3G60770
AT3G53870	AT4G00100
AT2G47570	AT3G60770
AT2G47570	AT4G00100
AT1G74060	AT3G60770
AT1G74060	AT4G00100
AT1G09590	AT3G60770
AT1G09590	AT4G00100
AT4G34670	AT3G60770
AT4G34670	AT4G00100
AT3G11250	AT3G60770
AT3G11250	AT4G00100
AT4G10450	AT3G60770
AT4G10450	AT4G00100
AT3G09200	AT3G60770
AT3G09200	AT4G00100
AT4G36130	AT3G60770
AT4G36130	AT4G00100
AT3G04840	AT3G60770
AT3G04840	AT4G00100
AT5G27850	AT3G60770
AT5G27850	AT4G00100
AT3G16780	AT3G60770
AT3G16780	AT4G00100
AT1G02780	AT3G60770
AT1G02780	AT4G00100
AT3G05590	AT3G60770
AT3G05590	AT4G00100
AT3G51190	AT3G60770
AT3G51190	AT4G00100
AT4G30800	AT3G60770
AT4G30800	AT4G00100
AT1G57860	AT3G60770
AT1G57860	AT4G00100
AT2G18020	AT3G60770
AT2G18020	AT4G00100
AT5G23740	AT3G60770
AT5G23740	AT4G00100
AT5G58290	AT3G60770
AT5G58290	AT4G00100
AT2G37270	AT3G60770
AT2G37270	AT4G00100
AT2G18020	AT2G37190
AT2G18020	AT3G53430
AT2G18020	AT5G60670
AT3G51190	AT2G37190
AT3G51190	AT3G53430
AT3G51190	AT5G60670
AT1G33140	AT2G37190
AT1G33140	AT3G53430
AT1G33140	AT5G60670
AT5G59240	AT2G37190
AT5G59240	AT3G53430
AT5G59240	AT5G60670
AT1G18540	AT2G37190
AT1G18540	AT3G53430
AT1G18540	AT5G60670
AT5G20290	AT2G37190
AT5G20290	AT3G53430
AT5G20290	AT5G60670
AT1G33120	AT2G37190
AT1G33120	AT3G53430
AT1G33120	AT5G60670
AT2G40010	AT2G37190
AT2G40010	AT3G53430
AT2G40010	AT5G60670
AT4G10450	AT2G37190
AT4G10450	AT3G53430
AT4G10450	AT5G60670
AT3G11250	AT2G37190
AT3G11250	AT3G53430
AT3G11250	AT5G60670
AT3G09200	AT2G37190
AT3G09200	AT3G53430
AT3G09200	AT5G60670
AT4G36130	AT2G37190
AT4G36130	AT3G53430
AT4G36130	AT5G60670
AT2G47570	AT2G37190
AT2G47570	AT3G53430
AT2G47570	AT5G60670
AT1G74060	AT2G37190
AT1G74060	AT3G53430
AT1G74060	AT5G60670
AT3G05590	AT2G37190
AT3G05590	AT3G53430
AT3G05590	AT5G60670
AT5G27850	AT2G37190
AT5G27850	AT3G53430
AT5G27850	AT5G60670
AT4G00100	AT2G37190
AT4G00100	AT3G53430
AT4G00100	AT5G60670
AT3G60770	AT2G37190
AT3G60770	AT3G53430
AT3G60770	AT5G60670
AT1G74050	AT2G37190
AT1G74050	AT3G53430
AT1G74050	AT5G60670
AT5G65620	AT4G33090
AT5G36210	AT4G33090
AT3G24170	AT4G33090
AT5G10540	AT4G33090
AT3G54660	AT4G33090
AT1G57860	AT3G06850
AT1G57660	AT3G06850
AT1G09590	AT3G06850
AT1G09690	AT3G06850
AT4G22285	AT2G13540
AT4G22290	AT2G13540
AT4G22350	AT2G13540
AT4G22410	AT2G13540
AT5G42920	AT1G24706
AT3G02950	AT1G24706
AT5G16790	AT1G24706
AT3G22990	AT1G24706
AT5G65950	AT5G16280
AT5G20000	AT3G22630
AT5G20000	AT4G14800
AT3G51260	AT3G22630
AT3G51260	AT4G14800
AT5G58290	AT3G22630
AT5G58290	AT4G14800
AT5G66140	AT3G22630
AT5G66140	AT4G14800
AT1G53780	AT3G22630
AT1G53780	AT4G14800
AT3G26340	AT3G22630
AT3G26340	AT4G14800
AT1G64520	AT3G22630
AT1G64520	AT4G14800
AT1G53750	AT3G22630
AT1G53750	AT4G14800
AT1G13060	AT3G22630
AT1G13060	AT4G14800
AT5G19990	AT3G22630
AT5G19990	AT4G14800
AT5G42040	AT3G22630
AT5G42040	AT4G14800
AT3G08940	AT5G19760
AT2G40100	AT5G19760
AT5G14040	AT5G19760
AT5G01530	AT5G19760
AT3G48850	AT5G19760
AT1G74060	AT2G17360
AT1G74060	AT5G07090
AT1G74060	AT5G58420
AT3G60770	AT2G17360
AT3G60770	AT5G07090
AT3G60770	AT5G58420
AT5G19990	AT2G17360
AT5G19990	AT5G07090
AT5G19990	AT5G58420
AT1G09690	AT2G17360
AT1G09690	AT5G07090
AT1G09690	AT5G58420
AT2G18020	AT2G17360
AT2G18020	AT5G07090
AT2G18020	AT5G58420
AT1G74050	AT2G17360
AT1G74050	AT5G07090
AT1G74050	AT5G58420
AT3G51190	AT2G17360
AT3G51190	AT5G07090
AT3G51190	AT5G58420
AT1G53750	AT2G17360
AT1G53750	AT5G07090
AT1G53750	AT5G58420
AT1G09590	AT2G17360
AT1G09590	AT5G07090
AT1G09590	AT5G58420
AT3G53870	AT2G17360
AT3G53870	AT5G07090
AT3G53870	AT5G58420
AT4G31700	AT2G17360
AT4G31700	AT5G07090
AT4G31700	AT5G58420
AT5G58290	AT2G17360
AT5G58290	AT5G07090
AT5G58290	AT5G58420
AT2G40010	AT2G17360
AT2G40010	AT5G07090
AT2G40010	AT5G58420
AT1G18540	AT2G17360
AT1G18540	AT5G07090
AT1G18540	AT5G58420
AT3G11940	AT2G17360
AT3G11940	AT5G07090
AT3G11940	AT5G58420
AT3G05590	AT2G17360
AT3G05590	AT5G07090
AT3G05590	AT5G58420
AT4G18760	AT2G17360
AT4G18760	AT5G07090
AT4G18760	AT5G58420
AT3G11250	AT2G17360
AT3G11250	AT5G07090
AT3G11250	AT5G58420
AT4G36130	AT2G17360
AT4G36130	AT5G07090
AT4G36130	AT5G58420
AT5G20000	AT2G17360
AT5G20000	AT5G07090
AT5G20000	AT5G58420
AT5G23740	AT2G17360
AT5G23740	AT5G07090
AT5G23740	AT5G58420
AT3G09200	AT2G17360
AT3G09200	AT5G07090
AT3G09200	AT5G58420
AT5G10360	AT2G17360
AT5G10360	AT5G07090
AT5G10360	AT5G58420
AT4G34670	AT2G17360
AT4G34670	AT5G07090
AT4G34670	AT5G58420
AT3G16780	AT2G17360
AT3G16780	AT5G07090
AT3G16780	AT5G58420
AT3G04840	AT2G17360
AT3G04840	AT5G07090
AT3G04840	AT5G58420
AT1G33120	AT2G17360
AT1G33120	AT5G07090
AT1G33120	AT5G58420
AT4G00100	AT2G17360
AT4G00100	AT5G07090
AT4G00100	AT5G58420
AT1G53780	AT2G17360
AT1G53780	AT5G07090
AT1G53780	AT5G58420
AT4G16030	AT2G17360
AT4G16030	AT5G07090
AT4G16030	AT5G58420
AT5G59240	AT2G17360
AT5G59240	AT5G07090
AT5G59240	AT5G58420
AT5G35530	AT2G17360
AT5G35530	AT5G07090
AT5G35530	AT5G58420
AT2G47570	AT2G17360
AT2G47570	AT5G07090
AT2G47570	AT5G58420
AT1G57860	AT2G17360
AT1G57860	AT5G07090
AT1G57860	AT5G58420
AT5G27850	AT2G17360
AT5G27850	AT5G07090
AT5G27850	AT5G58420
AT1G02780	AT2G17360
AT1G02780	AT5G07090
AT1G02780	AT5G58420
AT4G02230	AT2G17360
AT4G02230	AT5G07090
AT4G02230	AT5G58420
AT4G20850	AT2G17360
AT4G20850	AT5G07090
AT4G20850	AT5G58420
AT2G37270	AT2G17360
AT2G37270	AT5G07090
AT2G37270	AT5G58420
AT1G33140	AT2G17360
AT1G33140	AT5G07090
AT1G33140	AT5G58420
AT2G31610	AT2G17360
AT2G31610	AT5G07090
AT2G31610	AT5G58420
AT4G10450	AT2G17360
AT4G10450	AT5G07090
AT4G10450	AT5G58420
AT1G57660	AT2G17360
AT1G57660	AT5G07090
AT1G57660	AT5G58420
AT3G48930	AT2G17360
AT3G48930	AT5G07090
AT3G48930	AT5G58420
AT5G20290	AT2G17360
AT5G20290	AT5G07090
AT5G20290	AT5G58420
AT4G30800	AT2G17360
AT4G30800	AT5G07090
AT4G30800	AT5G58420
AT1G36280	AT3G19480
AT1G36280	AT1G17745
AT1G36280	AT4G34200
AT1G48850	AT3G19480
AT1G48850	AT1G17745
AT1G48850	AT4G34200
AT4G18440	AT3G19480
AT4G18440	AT1G17745
AT4G18440	AT4G34200
AT3G49920	AT3G15110
AT5G67500	AT3G15110
AT3G02950	AT2G47980
AT3G22990	AT2G47980
AT3G01890	AT2G47980
AT2G38770	AT2G47980
AT5G58230	AT2G47980
AT5G16790	AT2G47980
AT3G60830	AT2G47980
AT5G14170	AT2G47980
AT5G44510	AT5G65780
AT5G44510	AT5G65770
AT5G46070	AT5G65780
AT5G46070	AT5G65770
AT1G09620	AT5G56680
AT1G09620	AT1G68420
AT1G09620	AT1G70980
AT1G09620	AT5G38750
AT2G23080	AT3G54650
AT2G23080	AT2G44680
AT2G23080	AT3G60250
AT3G50000	AT3G54650
AT3G50000	AT2G44680
AT3G50000	AT3G60250
AT2G23070	AT3G54650
AT2G23070	AT2G44680
AT2G23070	AT3G60250
AT5G67380	AT3G54650
AT5G67380	AT2G44680
AT5G67380	AT3G60250
AT4G39710	AT2G39470
AT1G15850	AT2G38730
AT1G80670	AT2G38730
AT1G48850	AT1G29870
AT1G48850	AT1G29880
AT1G48850	AT3G44740
AT1G17960	AT3G02760
AT1G18130	AT3G02760
AT1G09620	AT3G02760
AT1G14610	AT3G02760
AT3G11710	AT3G02760
AT1G27160	AT3G02760
AT3G30805	AT3G02760
AT5G26830	AT3G02760
AT5G23250	AT2G35690
AT5G23250	AT4G16760
AT5G08300	AT2G35690
AT5G08300	AT4G16760
AT1G33140	AT1G08360
AT1G33140	AT5G22440
AT1G33140	AT2G27530
AT4G18760	AT1G08360
AT4G18760	AT5G22440
AT4G18760	AT2G27530
AT2G47570	AT1G08360
AT2G47570	AT5G22440
AT2G47570	AT2G27530
AT4G00100	AT1G08360
AT4G00100	AT5G22440
AT4G00100	AT2G27530
AT5G23740	AT1G08360
AT5G23740	AT5G22440
AT5G23740	AT2G27530
AT5G27850	AT1G08360
AT5G27850	AT5G22440
AT5G27850	AT2G27530
AT3G05590	AT1G08360
AT3G05590	AT5G22440
AT3G05590	AT2G27530
AT3G51190	AT1G08360
AT3G51190	AT5G22440
AT3G51190	AT2G27530
AT4G34670	AT1G08360
AT4G34670	AT5G22440
AT4G34670	AT2G27530
AT3G09200	AT1G08360
AT3G09200	AT5G22440
AT3G09200	AT2G27530
AT2G18020	AT1G08360
AT2G18020	AT5G22440
AT2G18020	AT2G27530
AT3G53430	AT1G08360
AT3G53430	AT5G22440
AT3G53430	AT2G27530
AT3G60770	AT1G08360
AT3G60770	AT5G22440
AT3G60770	AT2G27530
AT2G17360	AT1G08360
AT2G17360	AT5G22440
AT2G17360	AT2G27530
AT3G04840	AT1G08360
AT3G04840	AT5G22440
AT3G04840	AT2G27530
AT4G36130	AT1G08360
AT4G36130	AT5G22440
AT4G36130	AT2G27530
AT1G02780	AT1G08360
AT1G02780	AT5G22440
AT1G02780	AT2G27530
AT2G40010	AT1G08360
AT2G40010	AT5G22440
AT2G40010	AT2G27530
AT4G30800	AT1G08360
AT4G30800	AT5G22440
AT4G30800	AT2G27530
AT3G16780	AT1G08360
AT3G16780	AT5G22440
AT3G16780	AT2G27530
AT1G18540	AT1G08360
AT1G18540	AT5G22440
AT1G18540	AT2G27530
AT5G58420	AT1G08360
AT5G58420	AT5G22440
AT5G58420	AT2G27530
AT5G20290	AT1G08360
AT5G20290	AT5G22440
AT5G20290	AT2G27530
AT5G07090	AT1G08360
AT5G07090	AT5G22440
AT5G07090	AT2G27530
AT4G16030	AT1G08360
AT4G16030	AT5G22440
AT4G16030	AT2G27530
AT1G74050	AT1G08360
AT1G74050	AT5G22440
AT1G74050	AT2G27530
AT1G57660	AT1G08360
AT1G57660	AT5G22440
AT1G57660	AT2G27530
AT1G09690	AT1G08360
AT1G09690	AT5G22440
AT1G09690	AT2G27530
AT3G11250	AT1G08360
AT3G11250	AT5G22440
AT3G11250	AT2G27530
AT1G09590	AT1G08360
AT1G09590	AT5G22440
AT1G09590	AT2G27530
AT5G59240	AT1G08360
AT5G59240	AT5G22440
AT5G59240	AT2G27530
AT1G74060	AT1G08360
AT1G74060	AT5G22440
AT1G74060	AT2G27530
AT4G02230	AT1G08360
AT4G02230	AT5G22440
AT4G02230	AT2G27530
AT1G57860	AT1G08360
AT1G57860	AT5G22440
AT1G57860	AT2G27530
AT2G37190	AT1G08360
AT2G37190	AT5G22440
AT2G37190	AT2G27530
AT4G10450	AT1G08360
AT4G10450	AT5G22440
AT4G10450	AT2G27530
AT1G33120	AT1G08360
AT1G33120	AT5G22440
AT1G33120	AT2G27530
AT5G60670	AT1G08360
AT5G60670	AT5G22440
AT5G60670	AT2G27530
AT3G48930	AT1G08360
AT3G48930	AT5G22440
AT3G48930	AT2G27530
AT5G16790	AT4G15570
AT5G60040	AT4G15570
AT5G45140	AT4G15570
AT3G02950	AT4G15570
AT3G22990	AT4G15570
AT1G53750	AT1G56450
AT3G51260	AT1G56450
AT3G20050	AT1G56450
AT5G66140	AT1G56450
AT5G58290	AT1G56450
AT1G53780	AT1G56450
AT5G19990	AT1G56450
AT1G64520	AT1G56450
AT5G20000	AT1G56450
AT3G11830	AT1G56450
AT5G42040	AT1G56450
AT3G22630	AT1G56450
AT4G14800	AT1G56450
AT3G16680	AT1G56450
AT1G13060	AT1G56450
AT3G26340	AT1G56450
AT3G22320	AT1G56450
AT2G47980	AT4G21130
AT2G47980	AT4G05410
AT2G23070	AT1G71220
AT5G67380	AT1G71220
AT2G23080	AT1G71220
AT3G50000	AT1G71220
AT3G08560	AT3G58730
AT1G64200	AT3G58730
AT4G11150	AT3G58730
AT1G80410	AT4G18330
AT1G80410	AT2G18720
AT1G80410	AT2G14060
AT1G80410	AT1G04170
AT3G07920	AT4G18330
AT3G07920	AT2G18720
AT3G07920	AT2G14060
AT3G07920	AT1G04170
AT5G01940	AT4G18330
AT5G01940	AT2G18720
AT5G01940	AT2G14060
AT5G01940	AT1G04170
AT5G67380	AT4G18330
AT5G67380	AT2G18720
AT5G67380	AT2G14060
AT5G67380	AT1G04170
AT5G05470	AT4G18330
AT5G05470	AT2G18720
AT5G05470	AT2G14060
AT5G05470	AT1G04170
AT2G23080	AT4G18330
AT2G23080	AT2G18720
AT2G23080	AT2G14060
AT2G23080	AT1G04170
AT3G50000	AT4G18330
AT3G50000	AT2G18720
AT3G50000	AT2G14060
AT3G50000	AT1G04170
AT5G20920	AT4G18330
AT5G20920	AT2G18720
AT5G20920	AT2G14060
AT5G20920	AT1G04170
AT2G23070	AT4G18330
AT2G23070	AT2G18720
AT2G23070	AT2G14060
AT2G23070	AT1G04170
AT2G40290	AT4G18330
AT2G40290	AT2G18720
AT2G40290	AT2G14060
[truncated: 71,961 more rows]
